# Supplementary material for: Exploiting a multicomponent domino reaction strategy for the tailoring of versatile environmentally sensitive fluorophore-based nicotinonitriles incorporating pyrene and fluorene moieties
Source: Royal Society of Chemistry journal article supplement (doi:10.1039/c9ra09379f), 2019-01-01

## SUPPORTING INFORMATION FOR

**Exploiting a multicomponent domino reaction strategy for the tailoring of versatile environmentally sensitive fluorophore-based nicotinonitriles incorporating pyrene and fluorene moieties**

Essam M. Hussein<sup>a,b</sup>, Nizar El Guesmi<sup>a,c</sup> and Saleh A. Ahmed<sup>a,b</sup>

<sup>a</sup> *Department of Chemistry, Faculty of Applied Science, Umm Al-Qura University, 21955*

*Makkah, Saudi Arabia*

<sup>b</sup> *Department of Chemistry, Faculty of Science, Assiut university, 71516 Assiut, Egypt*

<sup>c</sup> *Département de chimie, Faculté des Sciences de Monastir, Avenue de l'Environnement,*

*5019 Monastir, Tunisia*

Correspondence may be addressed to:

Saleh A. Ahmed: E-mail addresses: \*E-mail: [saahmed@uqu.edu.sa](mailto:saahmed@uqu.edu.sa), [saleh.a.ahmed@aun.edu.eg](mailto:saleh.a.ahmed@aun.edu.eg),  
[saleh\\_63@hotmail.com](mailto:saleh_63@hotmail.com)

Tel./Fax: + 966 530435760

|                                                                                                                          |            |
|--------------------------------------------------------------------------------------------------------------------------|------------|
| <b><sup>1</sup>H NMR spectrum of 2-(9H-fluoren-2-yl)-4-phenyl-6-(pyren-1-yl)nicotinonitrile (5a)</b>                     | <b>S7</b>  |
| <b><sup>13</sup>C NMR spectrum of 2-(9H-fluoren-2-yl)-4-phenyl-6-(pyren-1-yl)nicotinonitrile (5a)</b>                    | <b>S8</b>  |
| <b>Expanded <sup>13</sup>C NMR spectrum of 2-(9H-fluoren-2-yl)-4-phenyl-6-(pyren-1-yl)nicotinonitrile (5a)</b>           | <b>S9</b>  |
| <b>DEPT-135 NMR spectrum of 2-(9H-fluoren-2-yl)-4-phenyl-6-(pyren-1-yl)nicotinonitrile (5a)</b>                          | <b>S10</b> |
| <b><sup>1</sup>H NMR spectrum of 4-(4-(Dimethylamino)phenyl)-2-(9H-fluoren-2-yl)-6-(pyren-1-yl)nicotinonitrile (5b)</b>  | <b>S11</b> |
| <b><sup>13</sup>C NMR spectrum of 4-(4-(Dimethylamino)phenyl)-2-(9H-fluoren-2-yl)-6-(pyren-1-yl)nicotinonitrile (5b)</b> | <b>S12</b> |
| <b>DEPT-135 NMR spectrum of 4-(4-(Dimethylamino)phenyl)-2-(9H-fluoren-2-yl)-6-(pyren-1-yl)nicotinonitrile (5b)</b>       | <b>S13</b> |
| <b><sup>1</sup>H NMR Spectrum of 2-(9H-fluoren-2-yl)-4-(4-methoxyphenyl)-6-(pyren-1-yl)nicotinonitrile (5c)</b>          | <b>S14</b> |
| <b><sup>13</sup>C-NMR Spectrum of 2-(9H-fluoren-2-yl)-4-(4-methoxyphenyl)-6-(pyren-1-yl)nicotinonitrile (5c)</b>         | <b>S15</b> |
| <b>DEPT-135 NMR Spectrum of 2-(9H-fluoren-2-yl)-4-(4-methoxyphenyl)-6-(pyren-1-yl)nicotinonitrile (5c)</b>               | <b>S16</b> |
| <b><sup>1</sup>H NMR spectrum of 4-(4-Chlorophenyl)-2-(9H-fluoren-2-yl)-6-(pyren-1-yl)nicotinonitrile (5d)</b>           | <b>S17</b> |
| <b><sup>13</sup>C NMR spectrum of 4-(4-Chlorophenyl)-2-(9H-fluoren-2-yl)-6-(pyren-1-yl)nicotinonitrile (5d)</b>          | <b>S18</b> |
| <b><sup>13</sup>C NMR spectrum of 4-(4-Chlorophenyl)-2-(9H-fluoren-2-yl)-6-(pyren-1-yl)nicotinonitrile (5d)</b>          | <b>S19</b> |
| <b>DEPT-135 NMR spectrum of 4-(4-Chlorophenyl)-2-(9H-fluoren-2-yl)-6-(pyren-1-yl)nicotinonitrile (5d)</b>                | <b>S20</b> |
| <b><sup>1</sup>H NMR spectrum of 4-(4-Cyanophenyl)-2-(9H-fluoren-2-yl)-6-(pyren-1-yl)nicotinonitrile (5e)</b>            | <b>S21</b> |
| <b><sup>13</sup>C NMR spectrum of 4-(4-Cyanophenyl)-2-(9H-fluoren-2-yl)-6-(pyren-1-yl)nicotinonitrile (5e)</b>           | <b>S22</b> |

|                                                                                                          |     |
|----------------------------------------------------------------------------------------------------------|-----|
| DEPT-135 NMR spectrum of 4-(4-Cyanophenyl)-2-(9H-fluoren-2-yl)-6-(pyren-1-yl)nicotinonitrile (5e)        | S23 |
| <sup>1</sup> H NMR spectrum of 2-(9H-fluoren-2-yl)-4-(4-nitrophenyl)-6-(pyren-1-yl)nicotinonitrile (5f)  | S24 |
| <sup>13</sup> C NMR spectrum of 2-(9H-fluoren-2-yl)-4-(4-nitrophenyl)-6-(pyren-1-yl)nicotinonitrile (5f) | S25 |
| DEPT-135 NMR spectrum of 2-(9H-fluoren-2-yl)-4-(4-nitrophenyl)-6-(pyren-1-yl)nicotinonitrile (5f)        | S26 |
| <sup>1</sup> H NMR spectrum of 4-Phenyl-2,6-di(pyren-1-yl)nicotinonitrile (6a)                           | S27 |
| <sup>13</sup> C NMR spectrum of 4-Phenyl-2,6-di(pyren-1-yl)nicotinonitrile (6a)                          | S28 |
| DEPT-135 NMR spectrum of 4-Phenyl-2,6-di(pyren-1-yl)nicotinonitrile (6a)                                 | S29 |
| <sup>1</sup> H NMR spectrum 4-(4-(Dimethylamino)phenyl)-2,6-di(pyren-1-yl)nicotinonitrile (6b)           | S30 |
| <sup>13</sup> C NMR spectrum 4-(4-(Dimethylamino)phenyl)-2,6-di(pyren-1-yl)nicotinonitrile (6b)          | S31 |
| DEPT-135 NMR spectrum 4-(4-(Dimethylamino)phenyl)-2,6-di(pyren-1-yl)nicotinonitrile (6b)                 | S32 |
| <sup>1</sup> H-NMR spectrum of 4-(4-Methoxyphenyl)-2,6-di(pyren-1-yl)nicotinonitrile (6c)                | S33 |
| <sup>13</sup> C NMR spectrum of 4-(4-Methoxyphenyl)-2,6-di(pyren-1-yl)nicotinonitrile (6c)               | S34 |
| DEPT-135 NMR spectrum of 4-(4-Methoxyphenyl)-2,6-di(pyren-1-yl)nicotinonitrile (6c)                      | S35 |
| <sup>1</sup> H-NMR spectrum of 4-(4-Chlorophenyl)-2,6-di(pyren-1-yl)nicotinonitrile (6d)                 | S36 |
| <sup>13</sup> C NMR spectrum of 4-(4-Chlorophenyl)-2,6-di(pyren-1-yl)nicotinonitrile (6d)                | S37 |
| DEPT-135 NMR spectrum of 4-(4-Chlorophenyl)-2,6-di(pyren-1-yl)nicotinonitrile (6d)                       | S38 |
| <sup>1</sup> H NMR spectrum 4-(4-Cyanophenyl)-2,6-di(pyren-1-yl)nicotinonitrile (6e)                     | S39 |
| <sup>13</sup> C NMR spectrum 4-(4-Cyanophenyl)-2,6-di(pyren-1-yl)nicotinonitrile (6e)                    | S40 |

|                                                                                                         |     |
|---------------------------------------------------------------------------------------------------------|-----|
| DEPT-135 NMR spectrum of 4-(4-Cyanophenyl)-2,6-di(pyren-1-yl)nicotinonitrile (6e)                       | S41 |
| <sup>1</sup> H NMR spectrum of 4-(4-Nitrophenyl)-2,6-di(pyren-1-yl)nicotinonitrile (6f)                 | S42 |
| <sup>13</sup> C NMR spectrum of 4-(4-Nitrophenyl)-2,6-di(pyren-1-yl)nicotinonitrile (6f)                | S43 |
| DEPT-135 NMR spectrum of 4-(4-Nitrophenyl)-2,6-di(pyren-1-yl)nicotinonitrile (6f)                       | S44 |
| <sup>1</sup> H NMR spectrum of 2,6-Di(9H-fluoren-2-yl)-4-phenylnicotinonitrile (7a)                     | S45 |
| <sup>13</sup> C-NMR spectrum of 2,6-Di(9H-fluoren-2-yl)-4-phenylnicotinonitrile (7a)                    | S46 |
| DEPT-135 NMR spectrum of 2,6-Di(9H-fluoren-2-yl)-4-phenylnicotinonitrile (7a)                           | S47 |
| <sup>1</sup> H NMR spectrum of 4-(4-(Dimethylamino)phenyl)-2,6-di(9H-fluoren-2-yl)nicotinonitrile (7b)  | S48 |
| <sup>13</sup> C NMR spectrum of 4-(4-(Dimethylamino)phenyl)-2,6-di(9H-fluoren-2-yl)nicotinonitrile (7b) | S49 |
| DEPT-135 NMR spectrum of 4-(4-(Dimethylamino)phenyl)-2,6-di(9H-fluoren-2-yl)nicotinonitrile (7b)        | S50 |
| <sup>1</sup> H NMR spectrum of 2,6-Di(9H-fluoren-2-yl)-4-(4-methoxyphenyl)nicotinonitrile (7c)          | S51 |
| <sup>13</sup> C NMR spectrum of 2,6-Di(9H-fluoren-2-yl)-4-(4-methoxyphenyl)nicotinonitrile (7c)         | S52 |
| DEPT-135 NMR spectrum of 2,6-Di(9H-fluoren-2-yl)-4-(4-methoxyphenyl)nicotinonitrile (7c)                | S53 |
| <sup>1</sup> H NMR spectrum of 4-(4-Chlorophenyl)-2,6-di(9H-fluoren-2-yl)nicotinonitrile (7d)           | S54 |
| <sup>13</sup> C NMR spectrum of 4-(4-Chlorophenyl)-2,6-di(9H-fluoren-2-yl)nicotinonitrile (7d)          | S55 |
| DEPT-135 NMR spectrum of 4-(4-Chlorophenyl)-2,6-di(9H-fluoren-2-yl)nicotinonitrile (7d)                 | S56 |
| <sup>1</sup> H NMR spectrum of 4-(4-Cyanophenyl)-2,6-di(9H-fluoren-2-yl)nicotinonitrile (7e)            | S57 |
| <sup>13</sup> C NMR spectrum of 4-(4-Cyanophenyl)-2,6-di(9H-fluoren-2-yl)nicotinonitrile (7e)           | S58 |

|                                                                                                                    |     |
|--------------------------------------------------------------------------------------------------------------------|-----|
| DEPT-135 NMR spectrum of 4-(4-Cyanophenyl)-2,6-di(9H-fluoren-2-yl)nicotinonitrile (7e)                             | S59 |
| <sup>1</sup> H NMR spectrum of 2,6-Di(9H-fluoren-2-yl)-4-(4-nitrophenyl)nicotinonitrile (7f)                       | S60 |
| <sup>13</sup> C NMR spectrum of 2,6-Di(9H-fluoren-2-yl)-4-(4-nitrophenyl)nicotinonitrile (7f)                      | S61 |
| DEPT-135 NMR spectrum of 2,6-Di(9H-fluoren-2-yl)-4-(4-nitrophenyl)nicotinonitrile (7f)                             | S62 |
| <sup>1</sup> H NMR spectrum of 6-(9H-fluoren-2-yl)-4-phenyl-2-(pyren-1-yl)nicotinonitrile (8a)                     | S63 |
| <sup>13</sup> C NMR spectrum of 6-(9H-fluoren-2-yl)-4-phenyl-2-(pyren-1-yl)nicotinonitrile (8a)                    | S64 |
| DEPT-135 NMR spectrum of 6-(9H-fluoren-2-yl)-4-phenyl-2-(pyren-1-yl)nicotinonitrile (8a)                           | S65 |
| <sup>1</sup> H NMR spectrum of 4-(4-(Dimethylamino)phenyl)-6-(9H-fluoren-2-yl)-2-(pyren-1-yl)nicotinonitrile (8b)  | S66 |
| <sup>13</sup> C NMR spectrum of 4-(4-(Dimethylamino)phenyl)-6-(9H-fluoren-2-yl)-2-(pyren-1-yl)nicotinonitrile (8b) | S67 |
| DEPT-135 spectrum of 4-(4-(Dimethylamino)phenyl)-6-(9H-fluoren-2-yl)-2-(pyren-1-yl)nicotinonitrile (8b)            | S68 |
| <sup>1</sup> H NMR spectrum of 6-(9H-fluoren-2-yl)-4-(4-methoxyphenyl)-2-(pyren-1-yl)nicotinonitrile (8c)          | S69 |
| <sup>13</sup> C NMR spectrum of 6-(9H-fluoren-2-yl)-4-(4-methoxyphenyl)-2-(pyren-1-yl)nicotinonitrile (8c)         | S70 |
| DEPT-135 NMR spectrum of 6-(9H-fluoren-2-yl)-4-(4-methoxyphenyl)-2-(pyren-1-yl)nicotinonitrile (8c)                | S71 |
| <sup>1</sup> H NMR spectrum of 4-(4-Chlorophenyl)-6-(9H-fluoren-2-yl)-2-(pyren-1-yl)nicotinonitrile (8d)           | S72 |
| <sup>13</sup> C NMR spectrum of 4-(4-Chlorophenyl)-6-(9H-fluoren-2-yl)-2-(pyren-1-yl)nicotinonitrile (8d)          | S73 |
| DEPT-135 NMR spectrum of 4-(4-Chlorophenyl)-6-(9H-fluoren-2-yl)-2-(pyren-1-yl)nicotinonitrile (8d)                 | S74 |
| <sup>1</sup> H NMR spectrum of 4-(4-Cyanophenyl)-6-(9H-fluoren-2-yl)-2-(pyren-1-yl)nicotinonitrile (8e)            | S75 |

|                                                                                                                |            |
|----------------------------------------------------------------------------------------------------------------|------------|
| <b><sup>13</sup>C NMR spectrum of 4-(4-Cyanophenyl)-6-(9H-fluoren-2-yl)-2-(pyren-1-yl)nicotinonitrile (8e)</b> | <b>S76</b> |
| <b>DEPT-135 NMR spectrum of 4-(4-Cyanophenyl)-6-(9H-fluoren-2-yl)-2-(pyren-1-yl)nicotinonitrile (8e)</b>       | <b>S77</b> |
| <b><sup>1</sup>H NMR spectrum of 6-(9H-fluoren-2-yl)-4-(4-nitrophenyl)-2-(pyren-1-yl)nicotinonitrile (8f)</b>  | <b>S78</b> |
| <b><sup>13</sup>C NMR spectrum of 6-(9H-fluoren-2-yl)-4-(4-nitrophenyl)-2-(pyren-1-yl)nicotinonitrile (8f)</b> | <b>S79</b> |
| <b>DEPT-135 NMR spectrum of 6-(9H-fluoren-2-yl)-4-(4-nitrophenyl)-2-(pyren-1-yl)nicotinonitrile (8f)</b>       | <b>S80</b> |

**<sup>1</sup>H NMR spectrum of 2-(9H-fluoren-2-yl)-4-phenyl-6-(pyren-1-yl)nicotinonitrile (5a)**

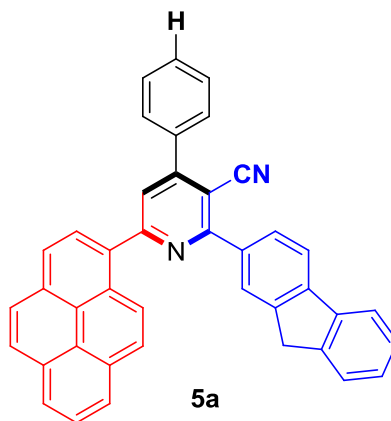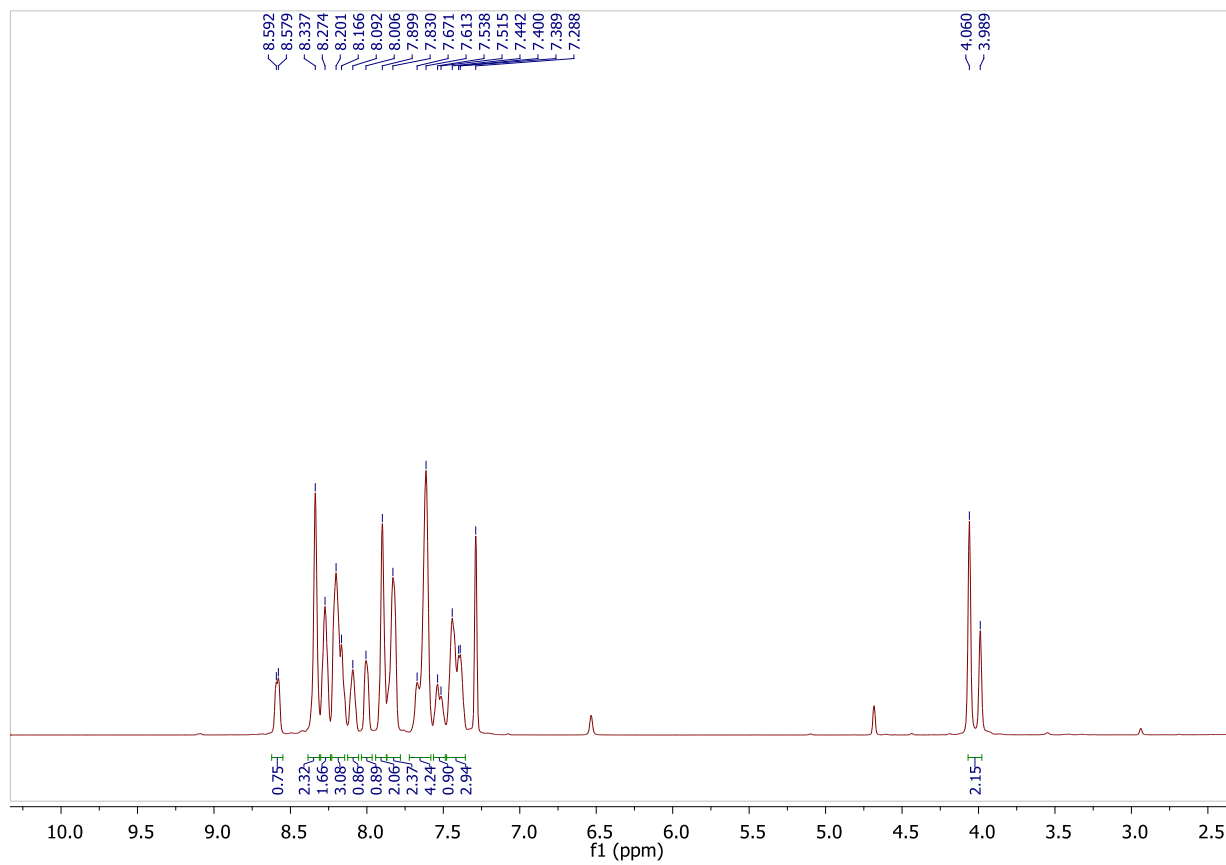

<sup>13</sup>C NMR spectrum of 2-(9H-fluoren-2-yl)-4-phenyl-6-(pyren-1-yl)nicotinonitrile (5a)

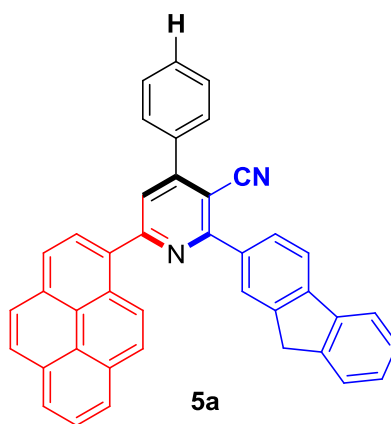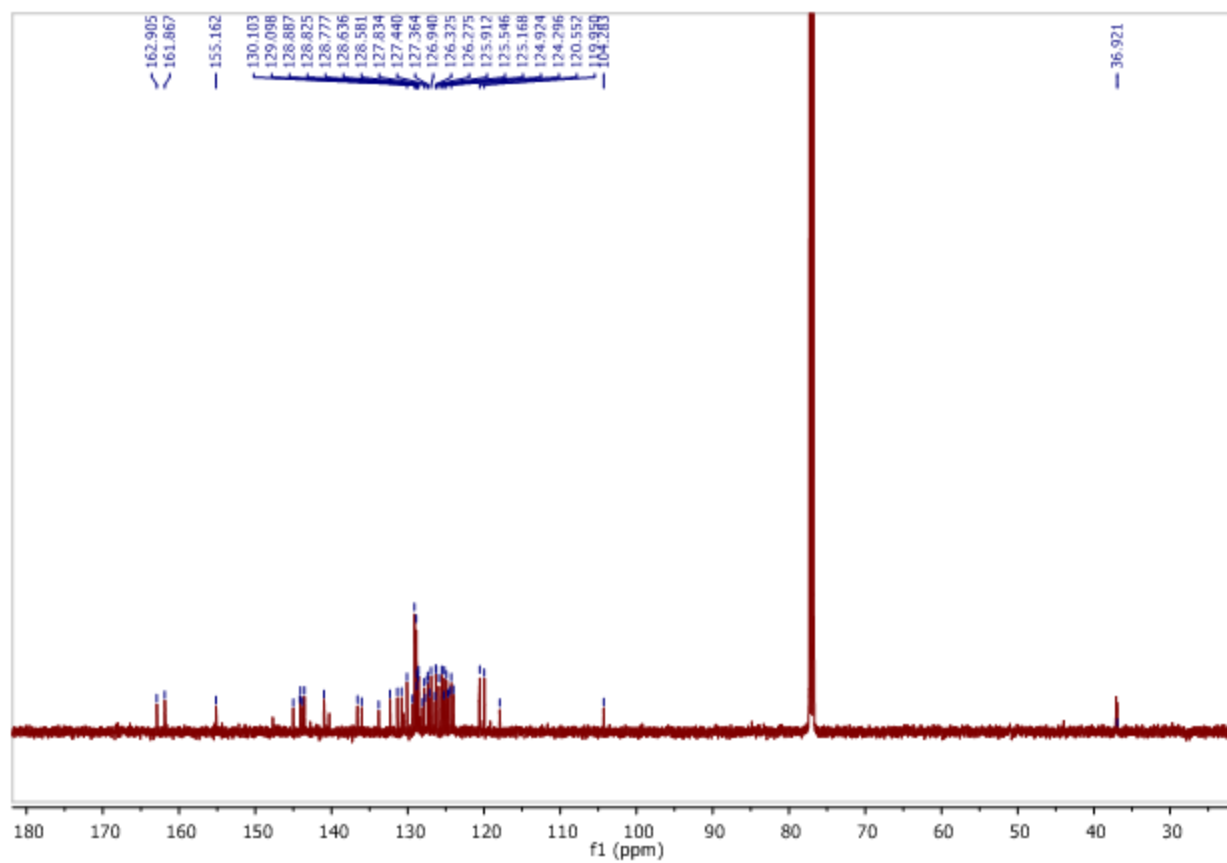



Expanded  $^{13}\text{C}$  NMR spectrum of 2-(9*H*-fluoren-2-yl)-4-phenyl-6-(pyren-1-yl)nicotinonitrile

(5a)

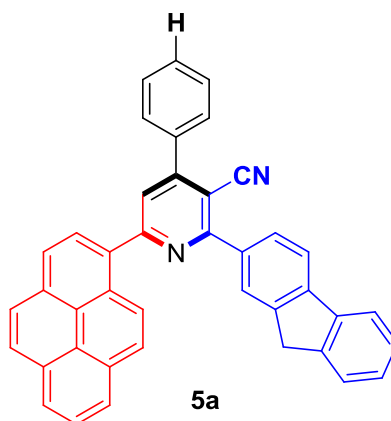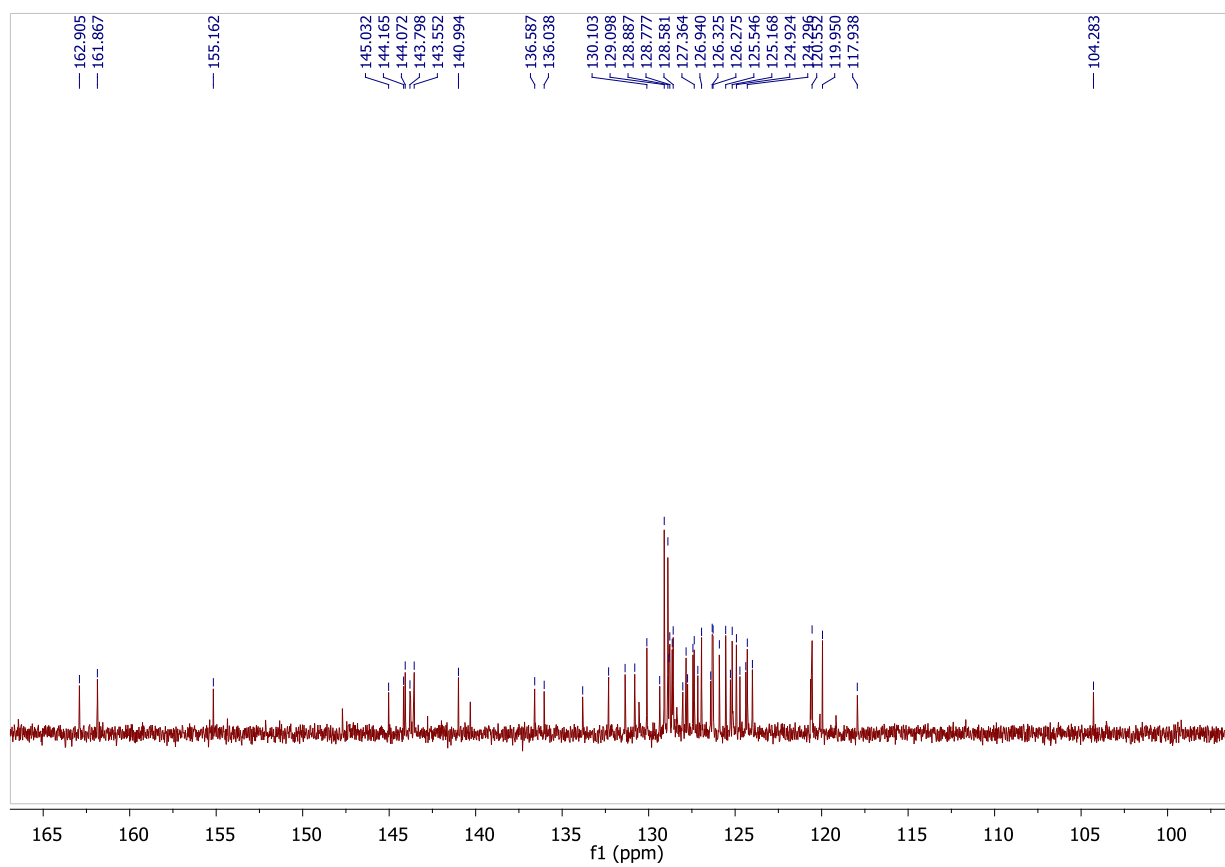

DEPT-135 NMR spectrum of 2-(9H-fluoren-2-yl)-4-phenyl-6-(pyren-1-yl)nicotinonitrile (5a)

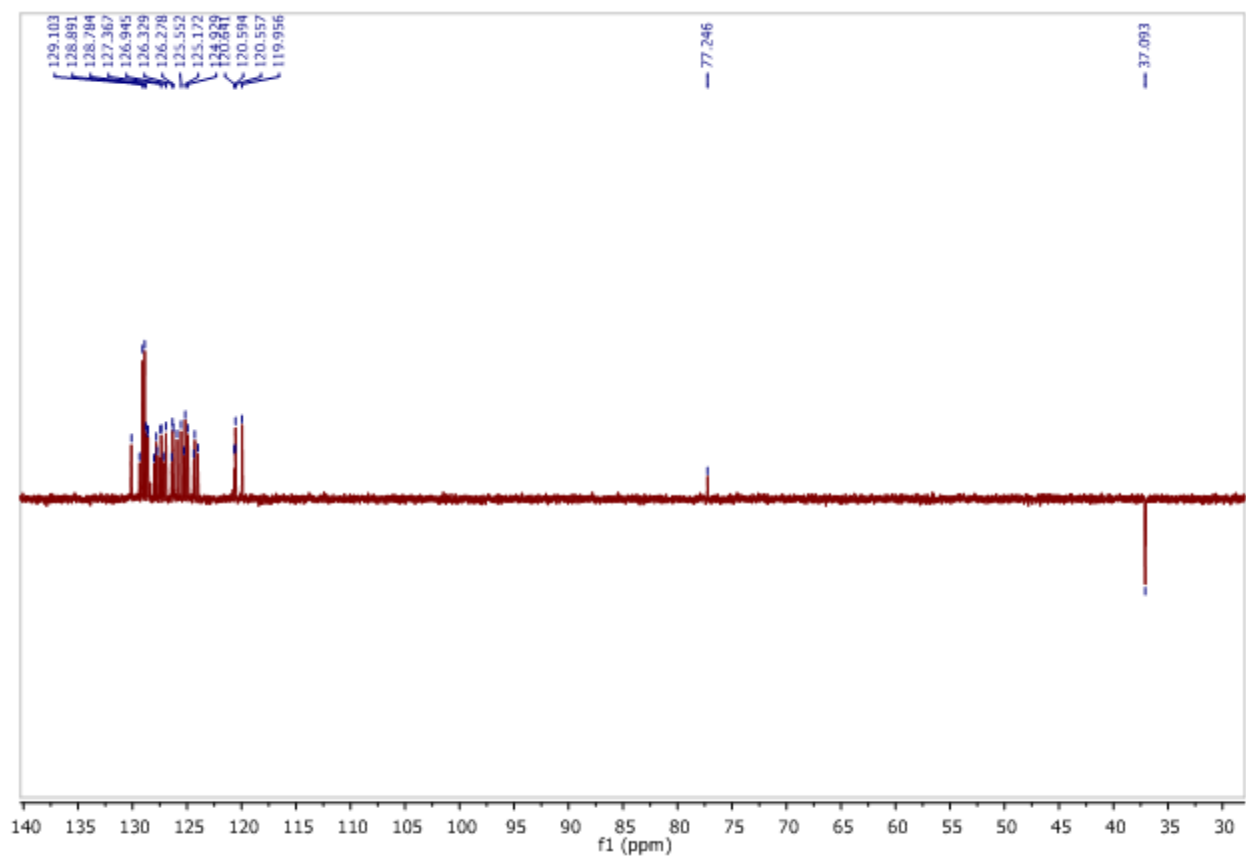

**<sup>1</sup>H NMR spectrum of 4-(4-(dimethylamino)phenyl)-2-(9H-fluoren-2-yl)-6-(pyren-1-yl)nicotinonitrile (5b)**

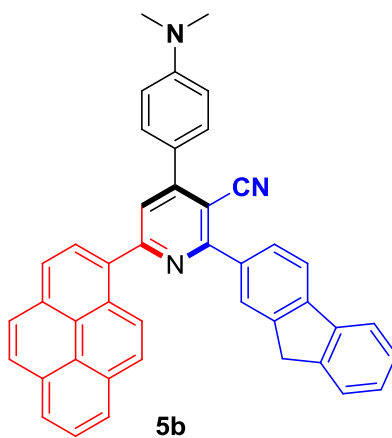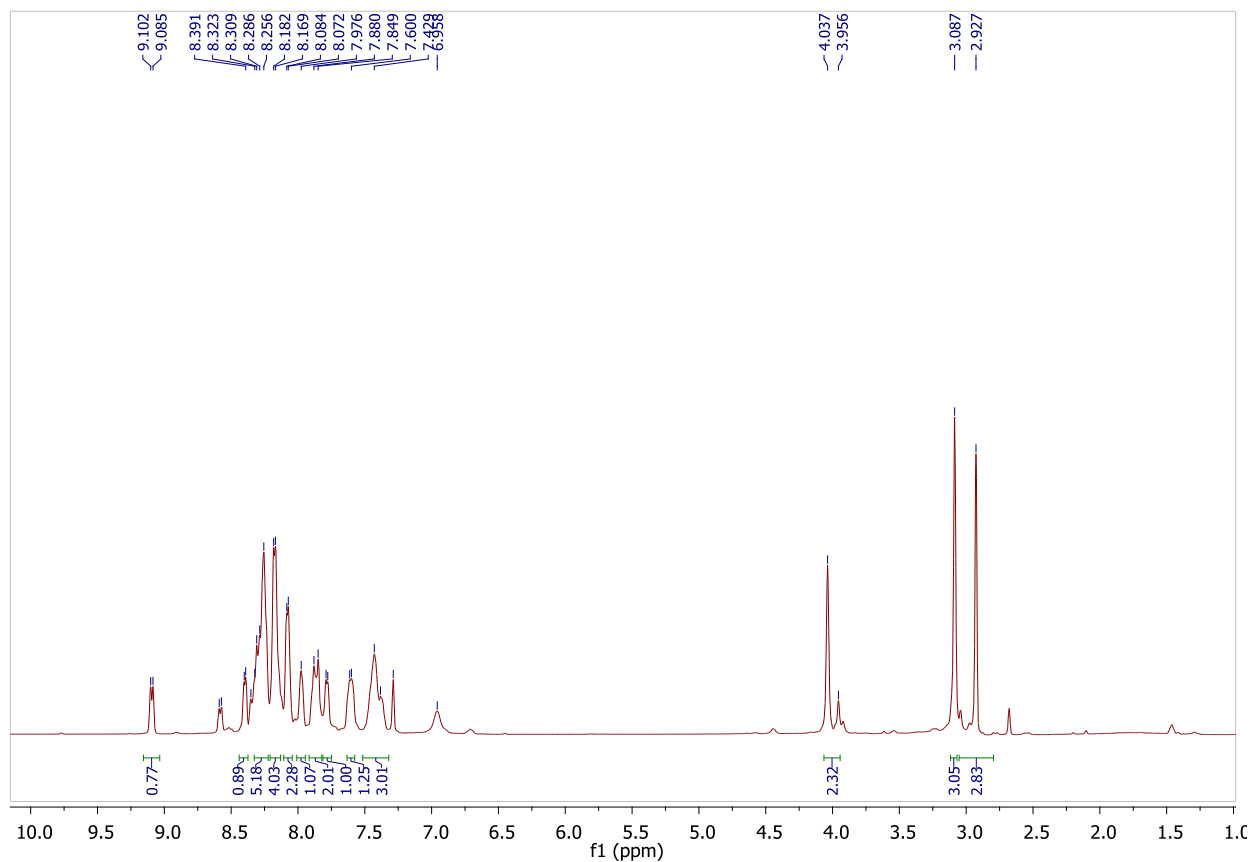

<sup>13</sup>C NMR spectrum of 4-(4-(dimethylamino)phenyl)-2-(9H-fluoren-2-yl)-6-(pyren-1-yl)nicotinonitrile (5b)

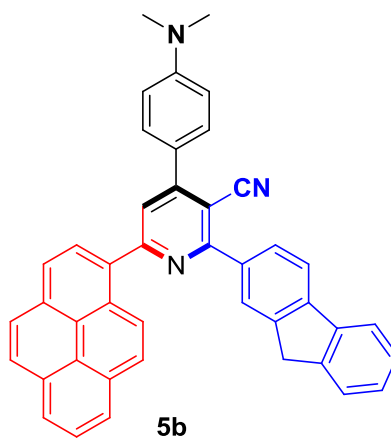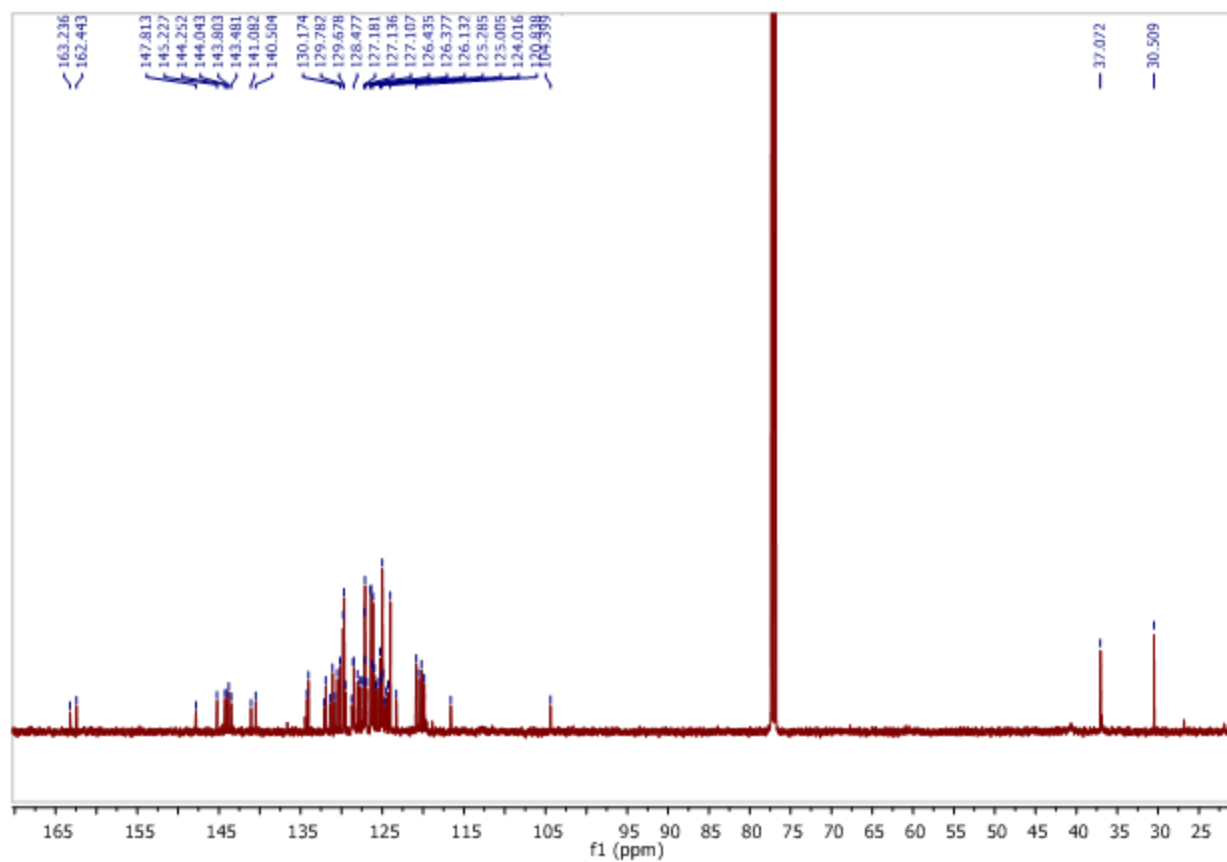

DEPT-135 NMR spectrum of 4-(4-(dimethylamino)phenyl)-2-(9H-fluoren-2-yl)-6-(pyren-1-yl)nicotinonitrile (5b)

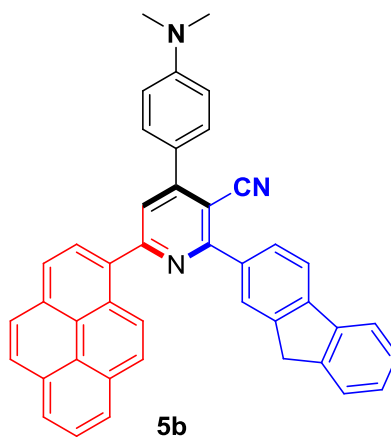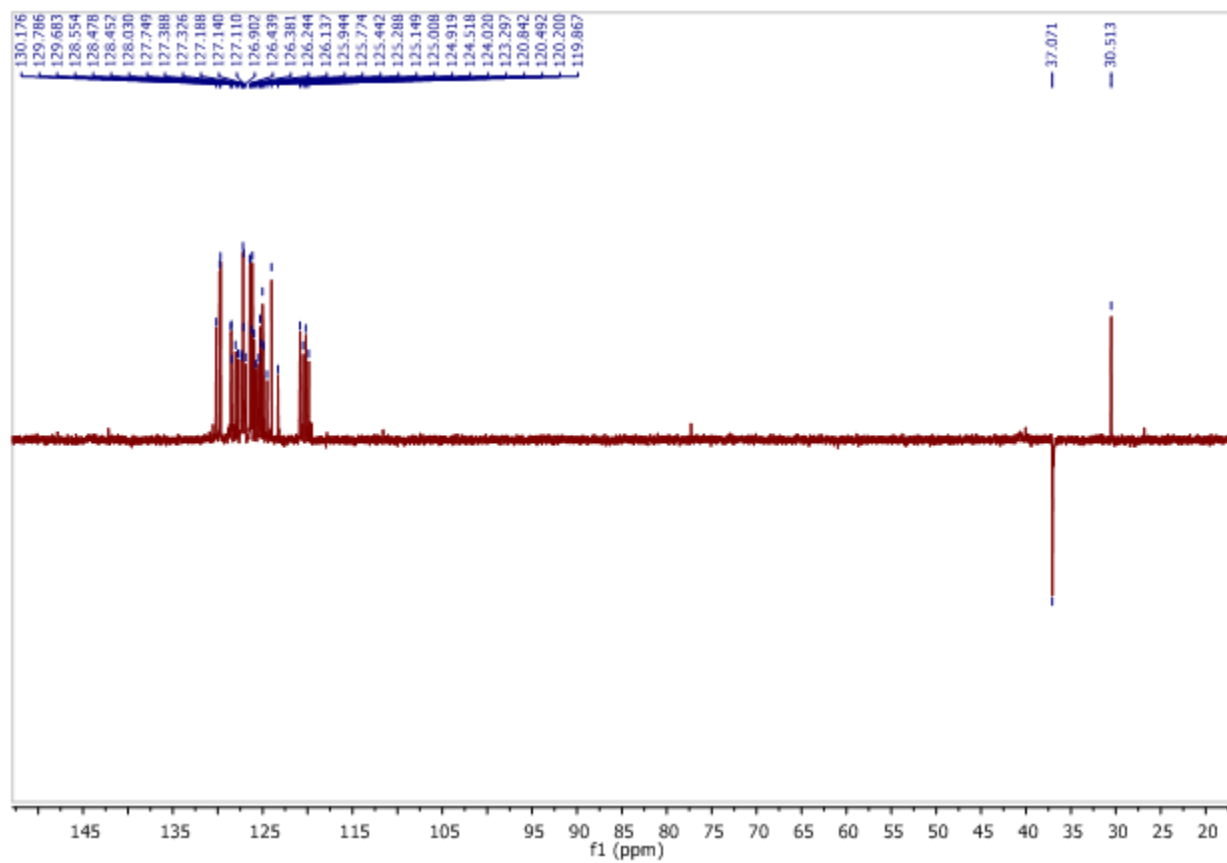

**<sup>1</sup>H NMR Spectrum of 2-(9H-fluoren-2-yl)-4-(4-methoxyphenyl)-6-(pyren-1-yl)nicotinonitrile**

**(5c)**

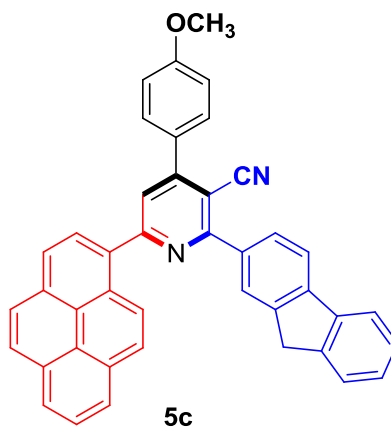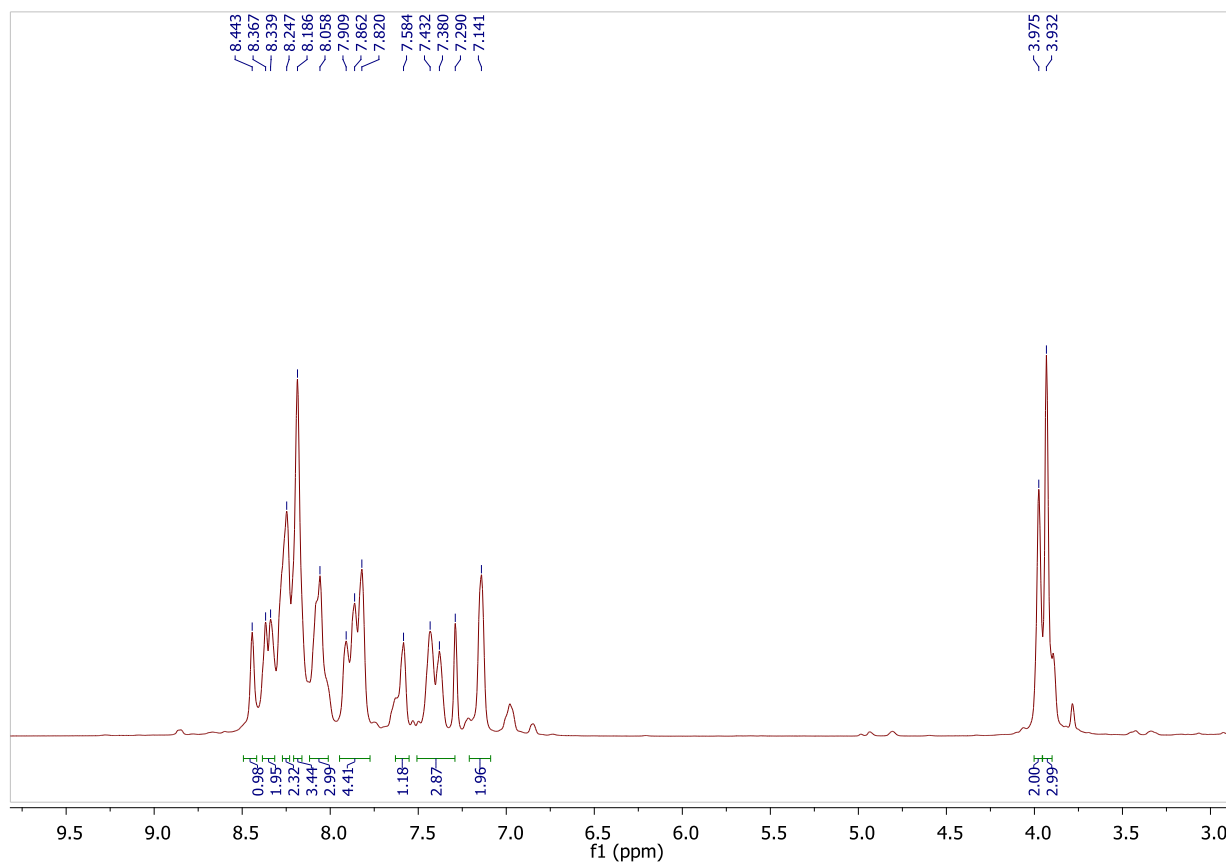

**<sup>13</sup>C NMR Spectrum of 2-(9H-fluoren-2-yl)-4-(4-methoxyphenyl)-6-(pyren-1-yl)nicotinonitrile (5c)**

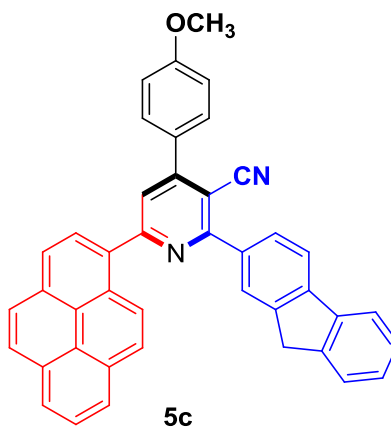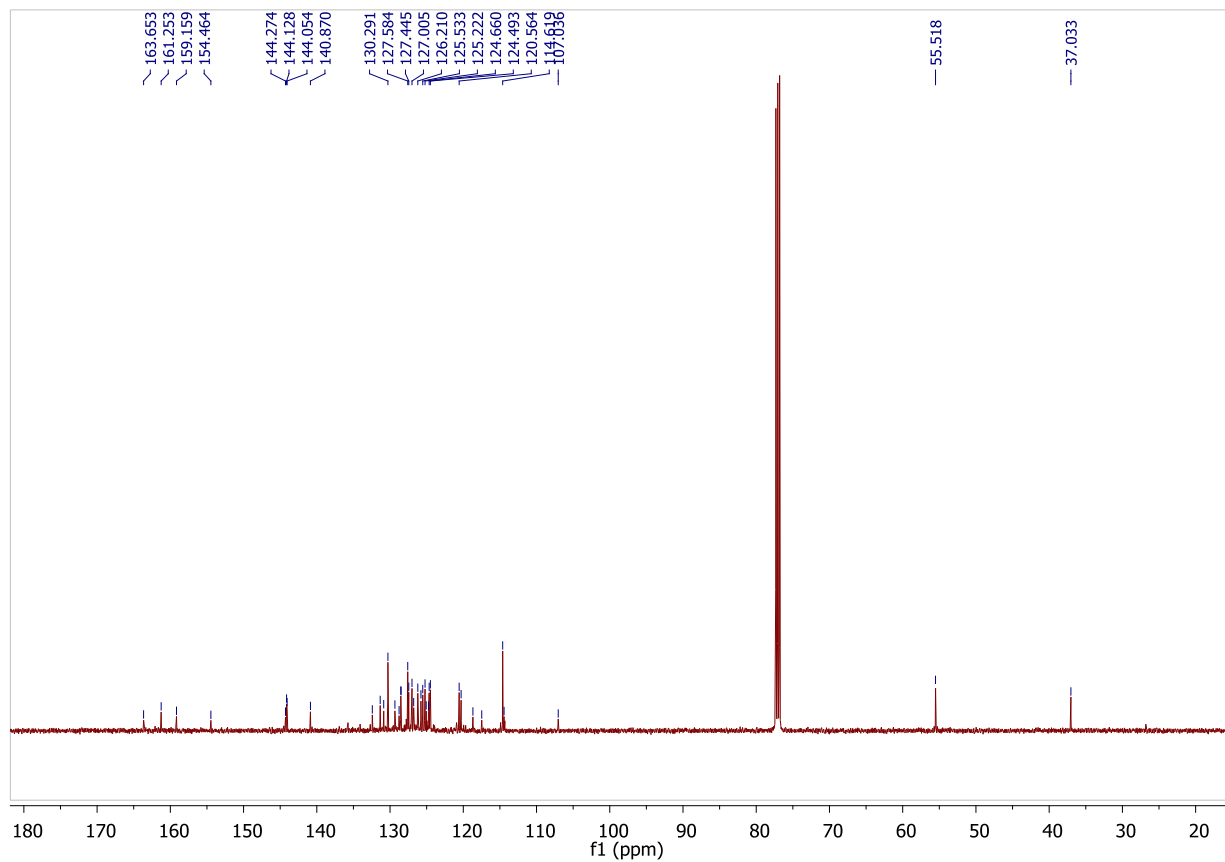

**DEPT-135 NMR Spectrum of 2-(9H-fluoren-2-yl)-4-(4-methoxyphenyl)-6-(pyren-1-yl)nicotinonitrile (5c)**

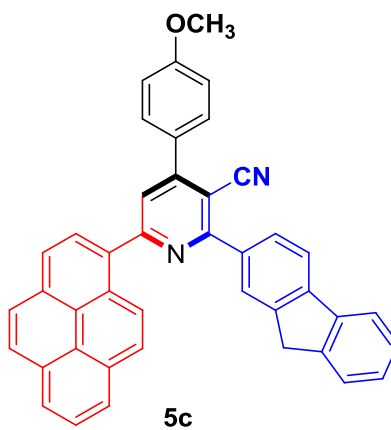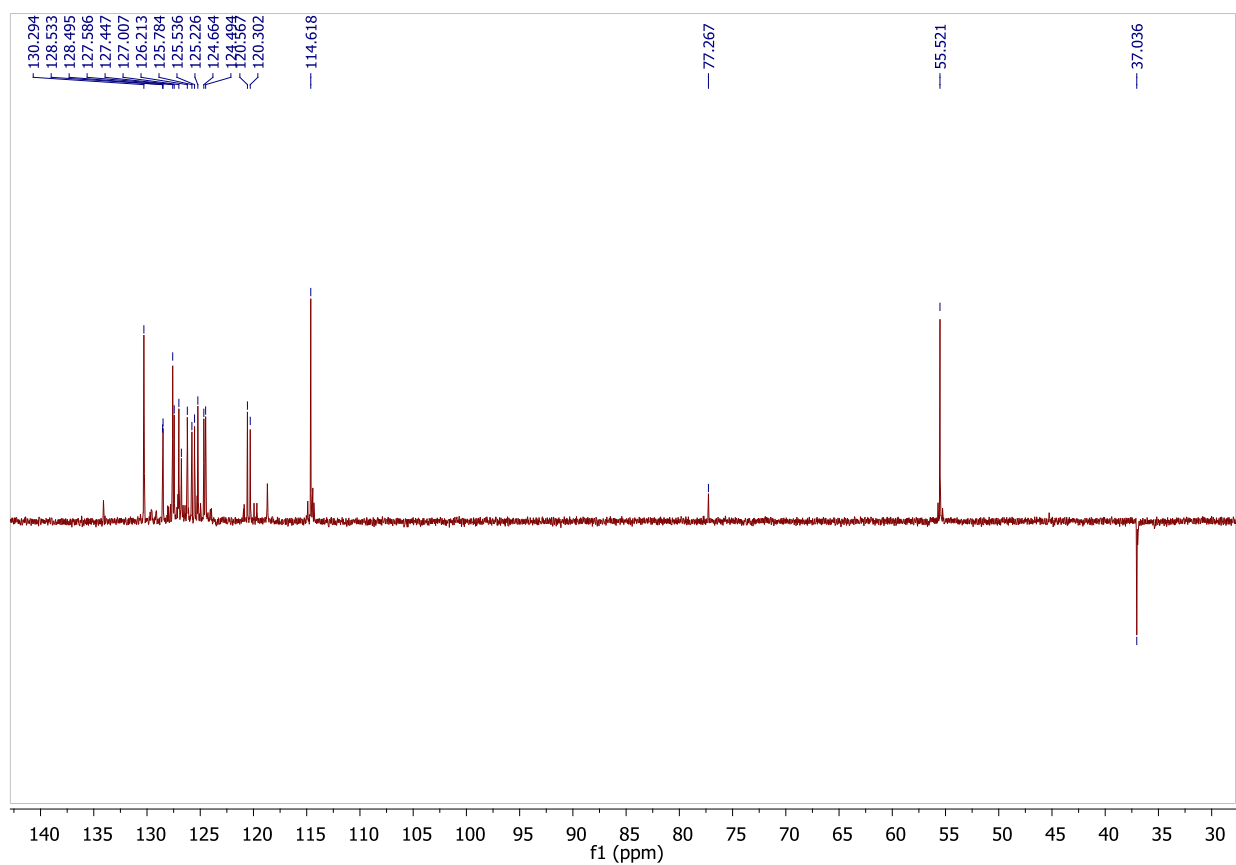



**<sup>1</sup>H NMR spectrum of 4-(4-chlorophenyl)-2-(9H-fluoren-2-yl)-6-(pyren-1-yl)nicotinonitrile**

**(5d)**

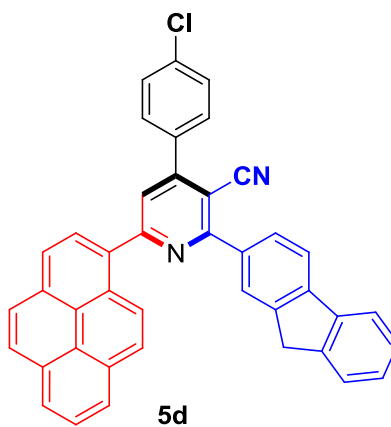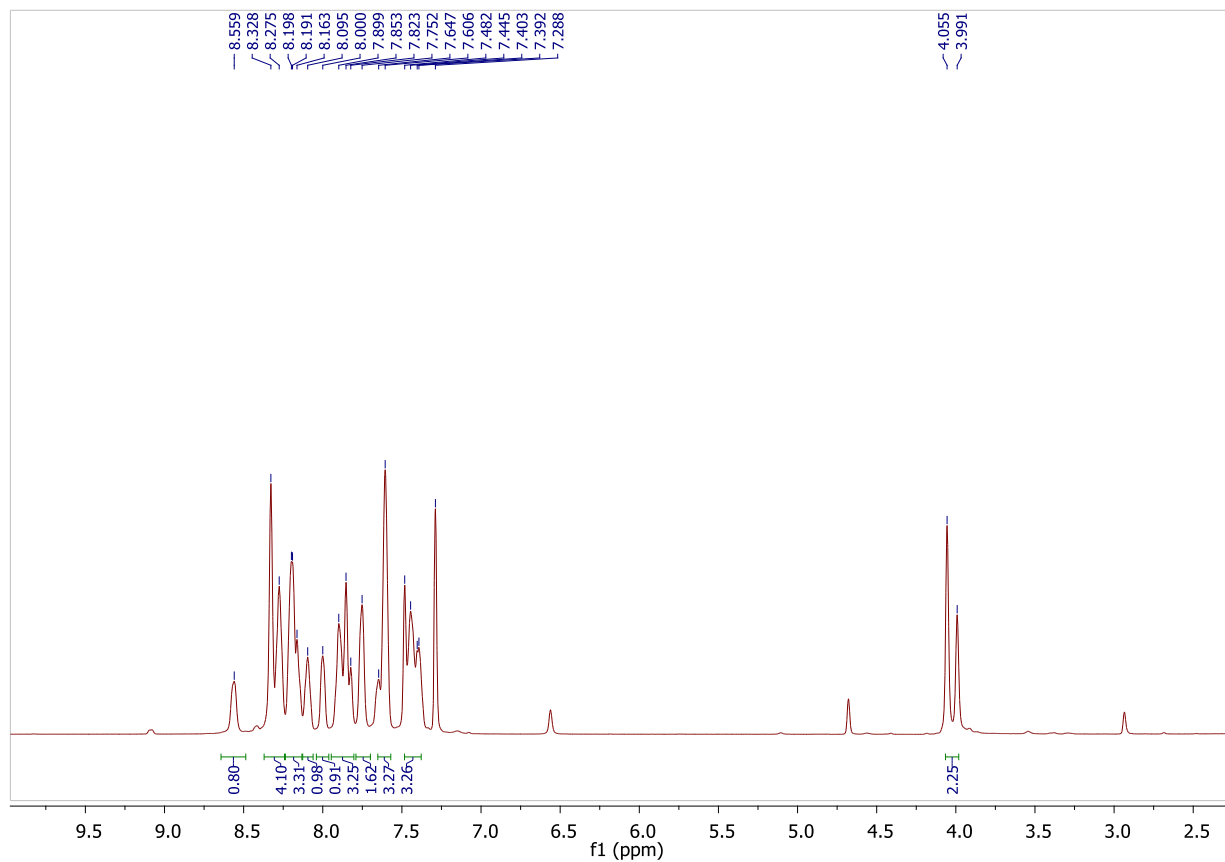

<sup>13</sup>C NMR spectrum of 4-(4-chlorophenyl)-2-(9H-fluoren-2-yl)-6-(pyren-1-yl)nicotinonitrile

(5d)

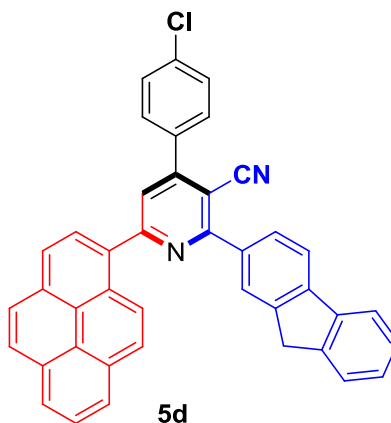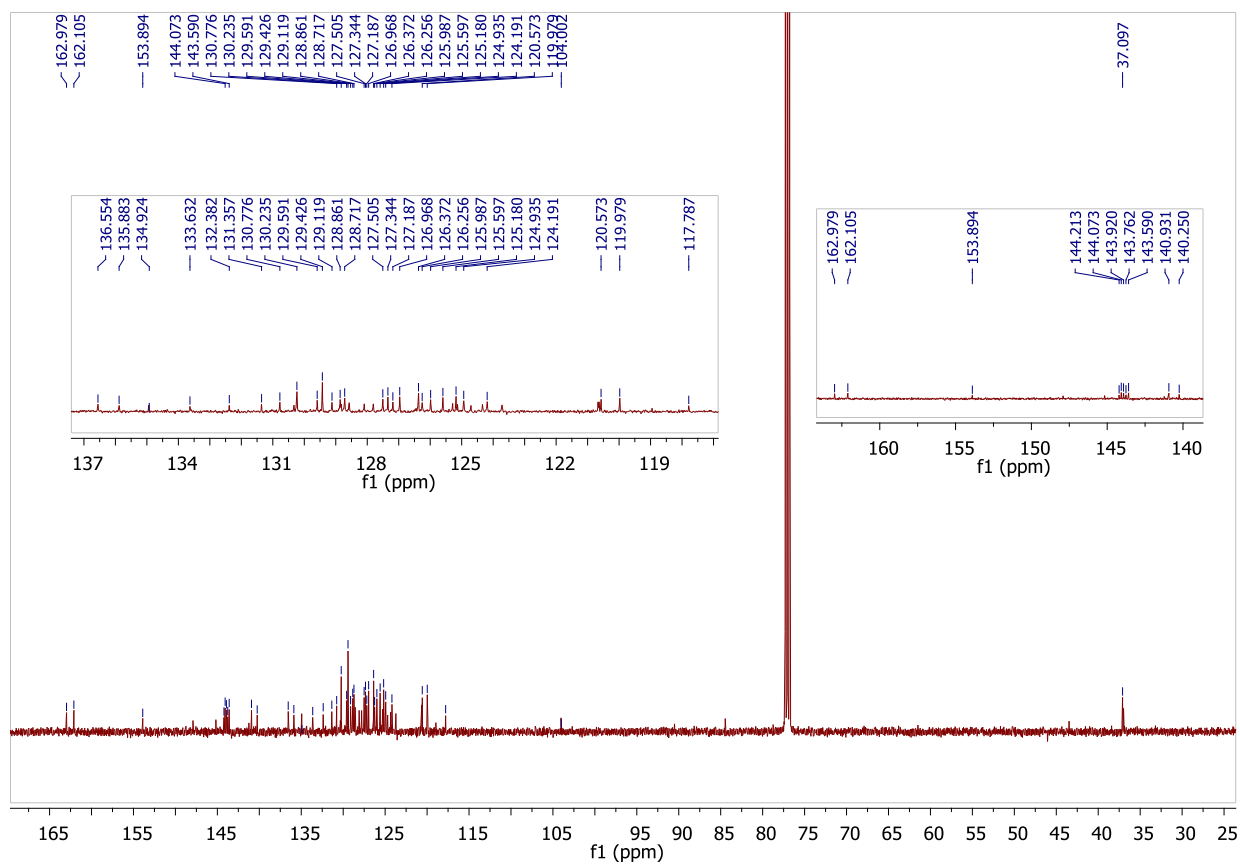

DEPT-135 NMR spectrum of 4-(4-chlorophenyl)-2-(9H-fluoren-2-yl)-6-(pyren-1-yl)nicotinonitrile (5d)

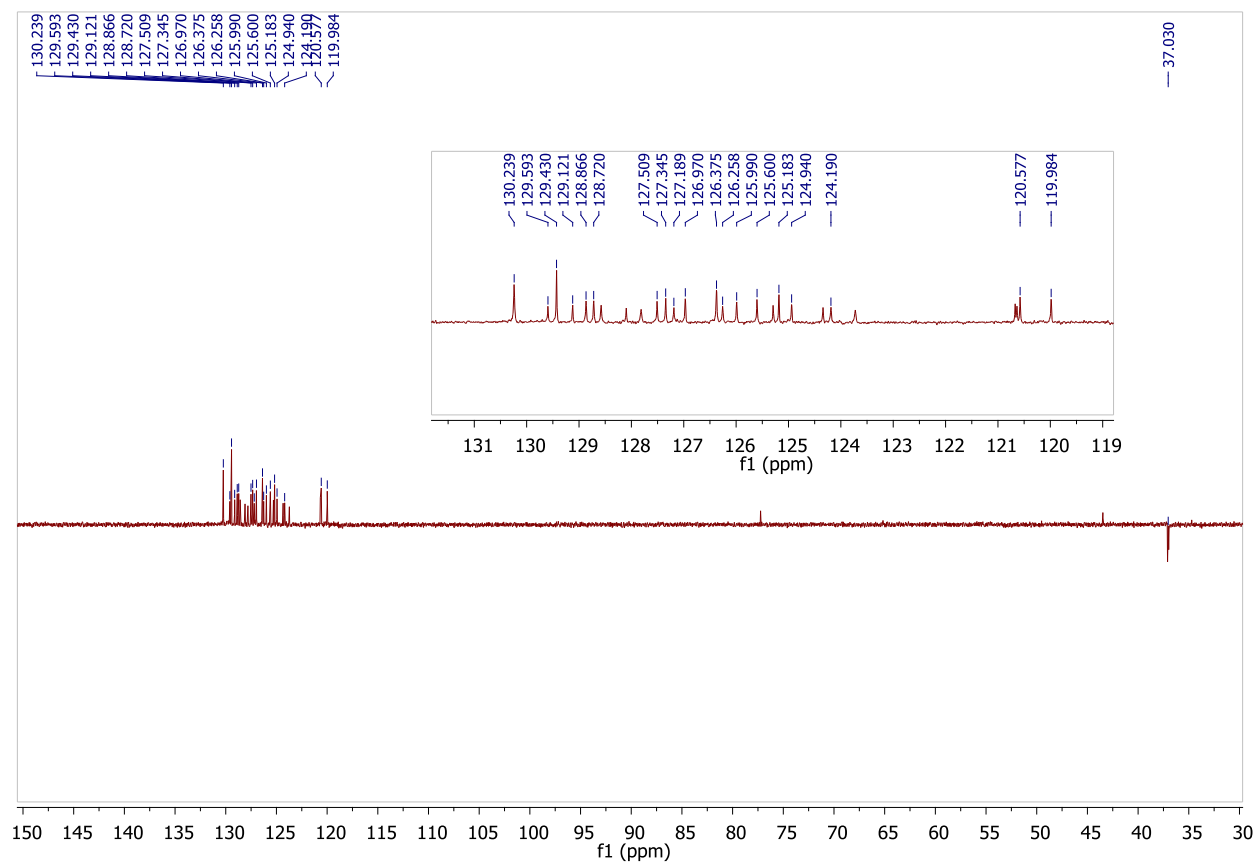

**<sup>1</sup>H NMR spectrum of 4-(4-cyanophenyl)-2-(9H-fluoren-2-yl)-6-(pyren-1-yl)nicotinonitrile**

**(5e)**

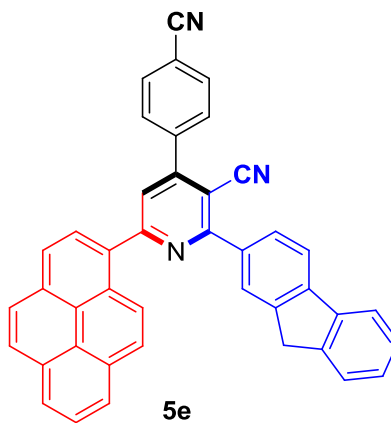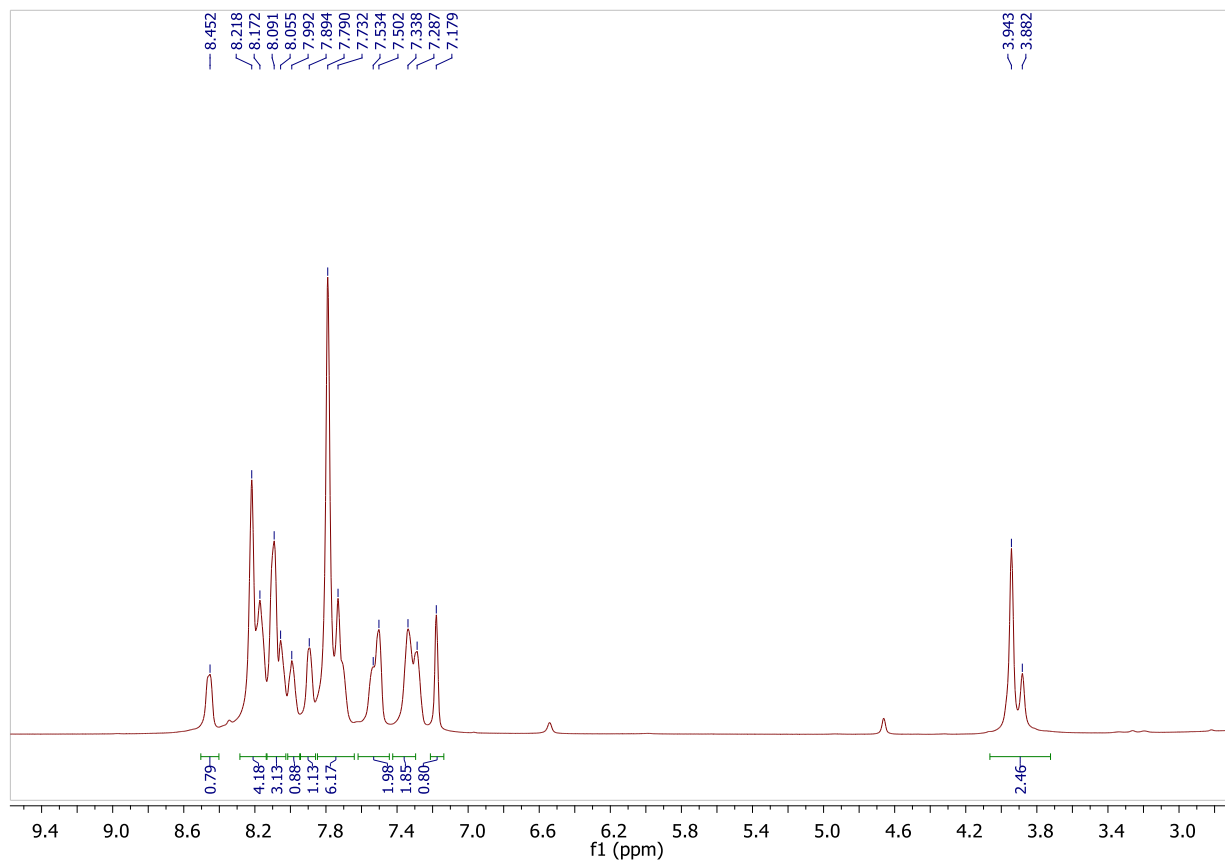

**$^{13}\text{C}$  NMR spectrum of 4-(4-cyanophenyl)-2-(9H-fluoren-2-yl)-6-(pyren-1-yl)nicotinonitrile**

(5e)

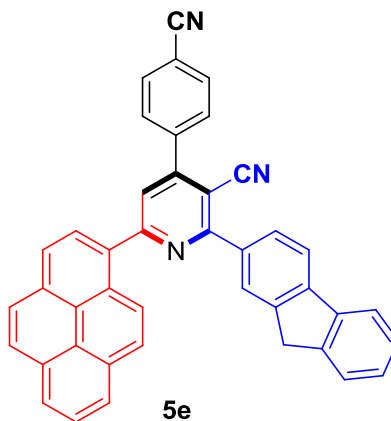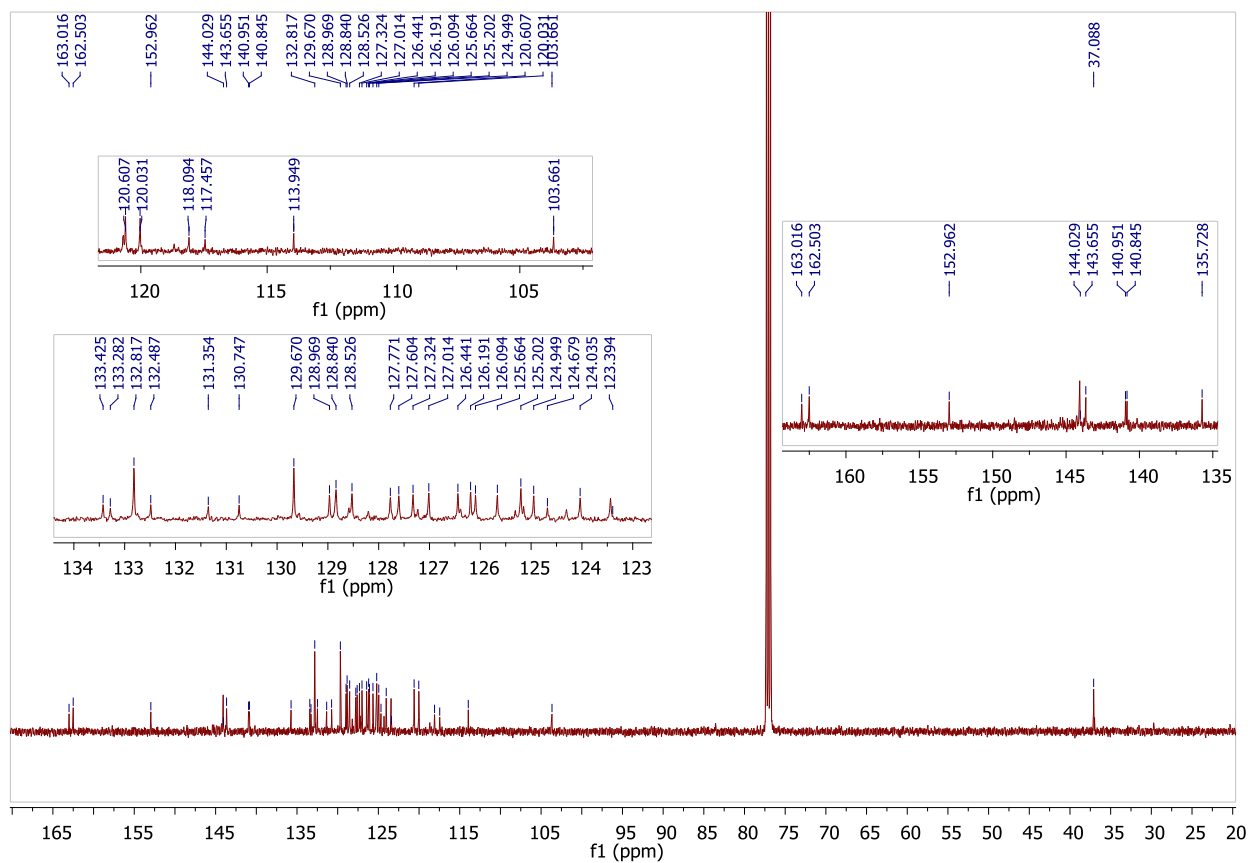

DEPT-135 NMR spectrum of 4-(4-cyanophenyl)-2-(9H-fluoren-2-yl)-6-(pyren-1-yl)nicotinonitrile (5e)

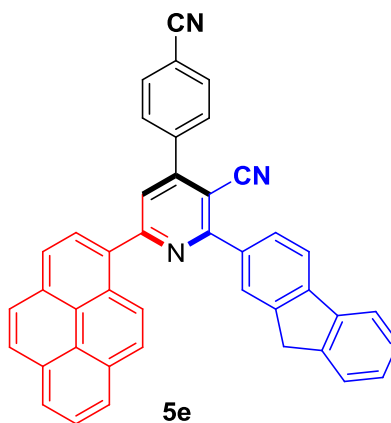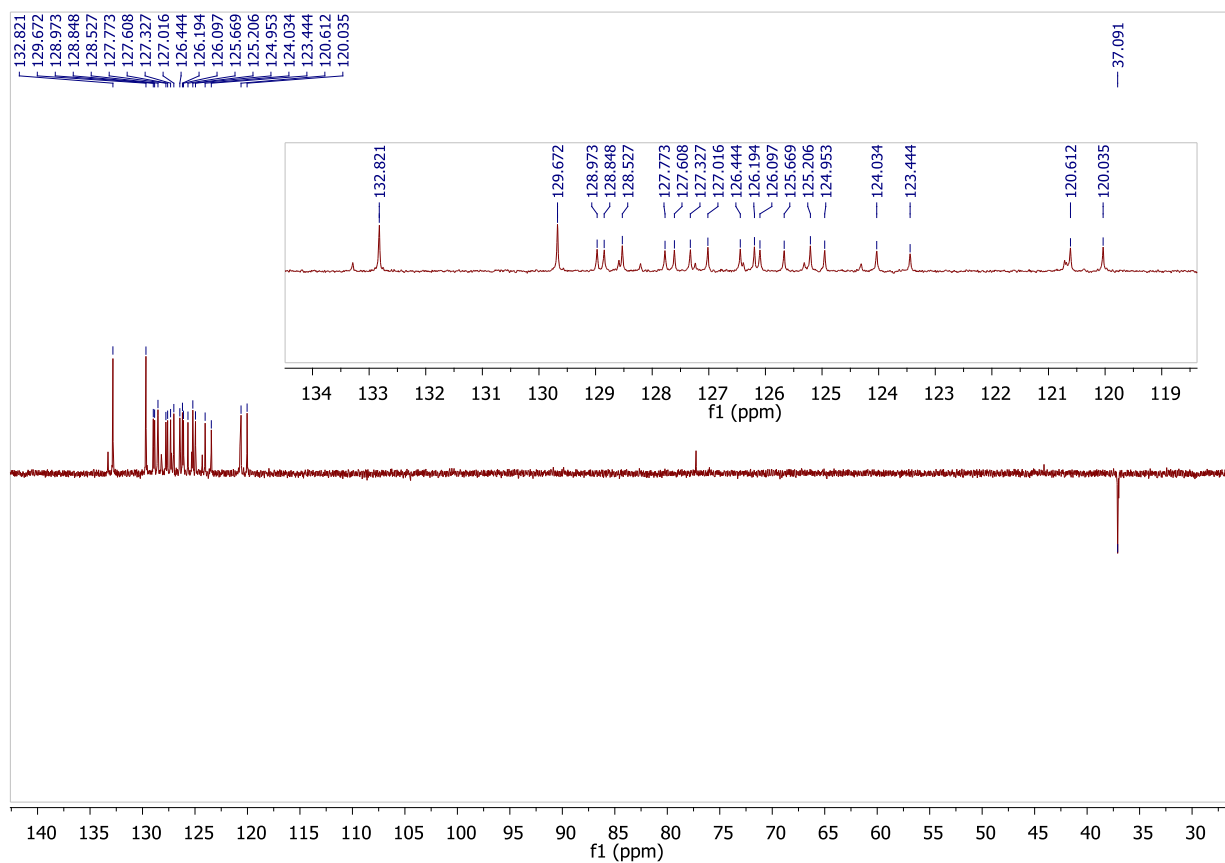

**<sup>1</sup>H NMR spectrum of 2-(9H-fluoren-2-yl)-4-(4-nitrophenyl)-6-(pyren-1-yl)nicotinonitrile (5f)**

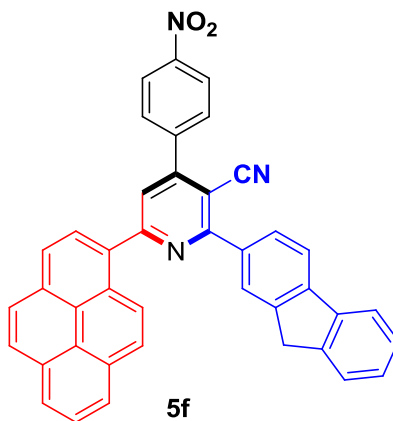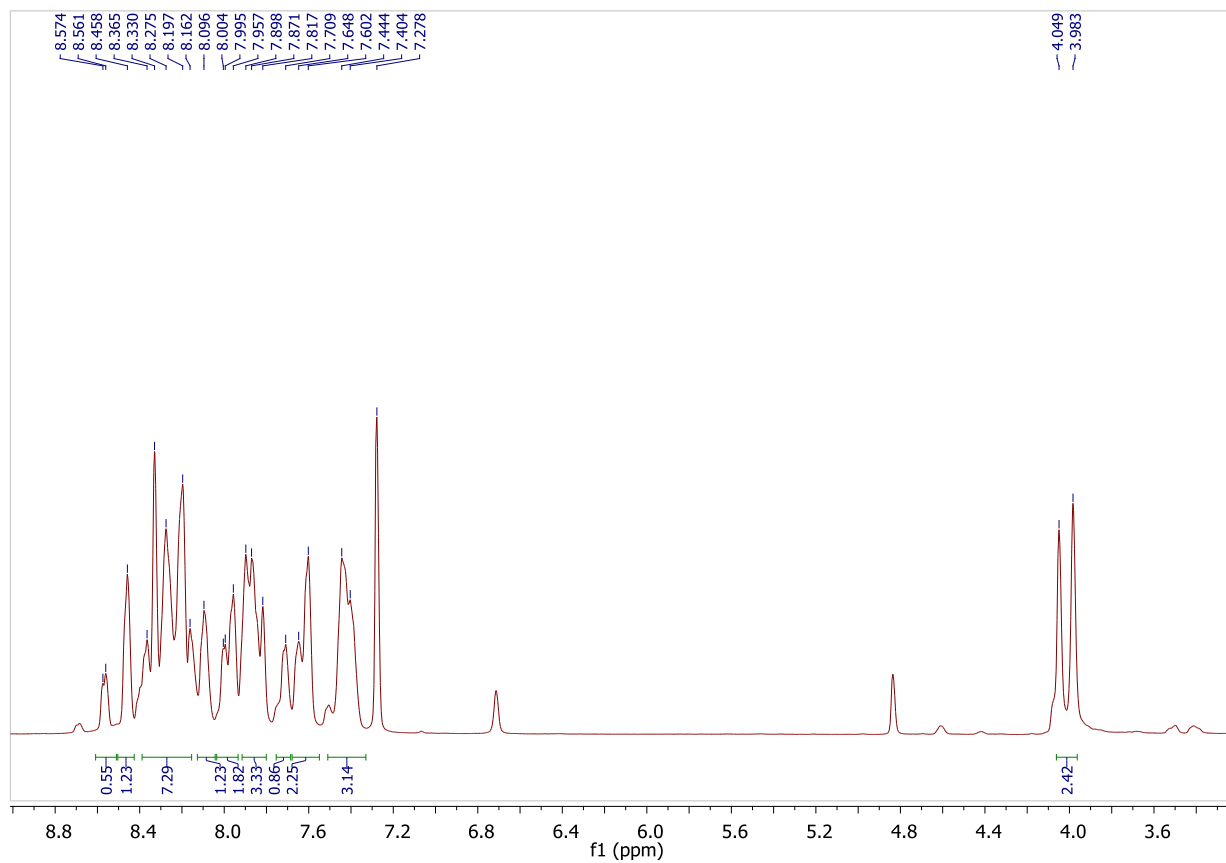

<sup>13</sup>C NMR spectrum of 2-(9H-fluoren-2-yl)-4-(4-nitrophenyl)-6-(pyren-1-yl)nicotinonitrile

(5f)

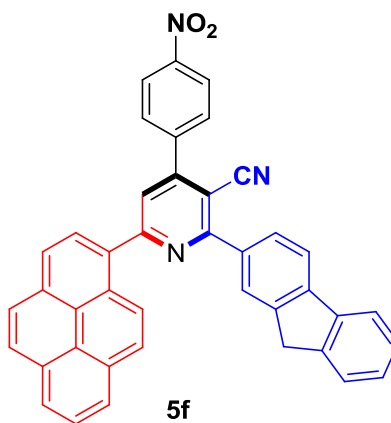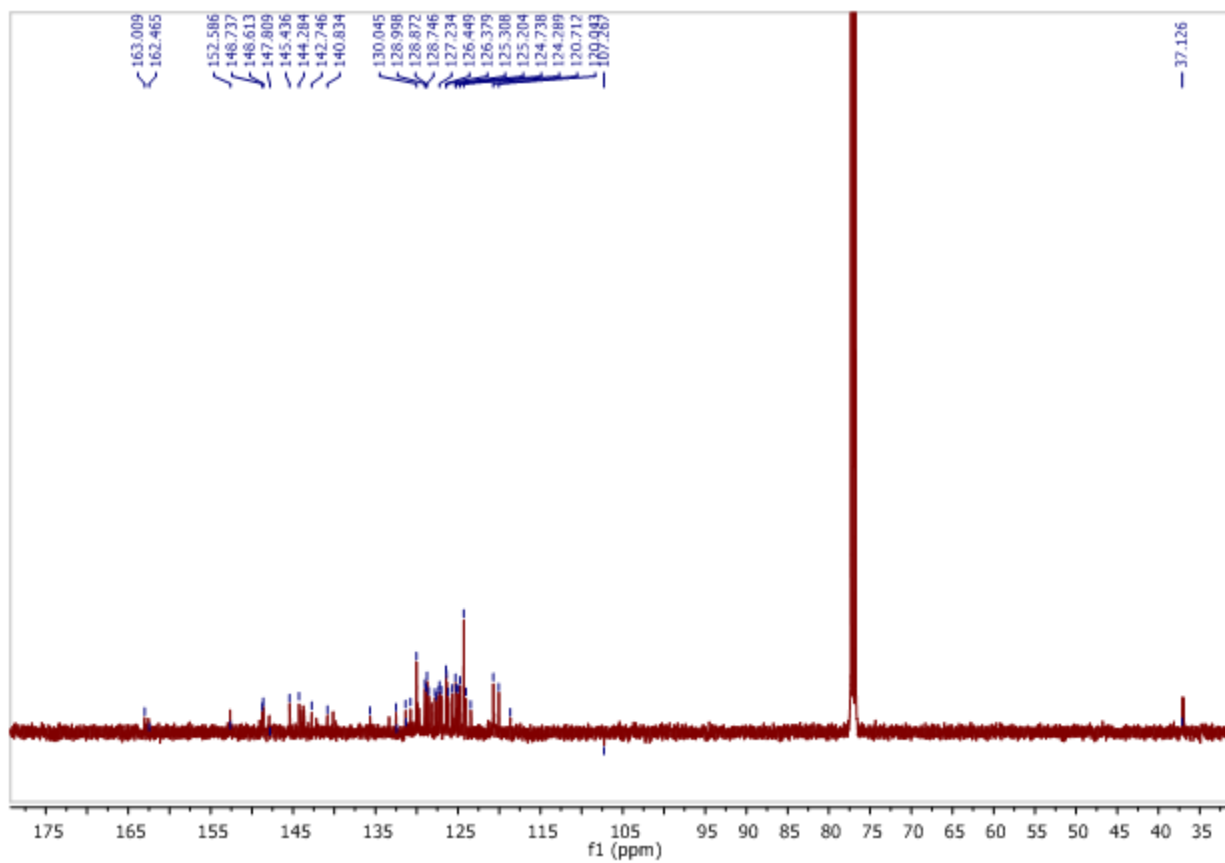



DEPT-135 NMR spectrum of 2-(9H-fluoren-2-yl)-4-(4-nitrophenyl)-6-(pyren-1-yl)nicotinonitrile (5f)

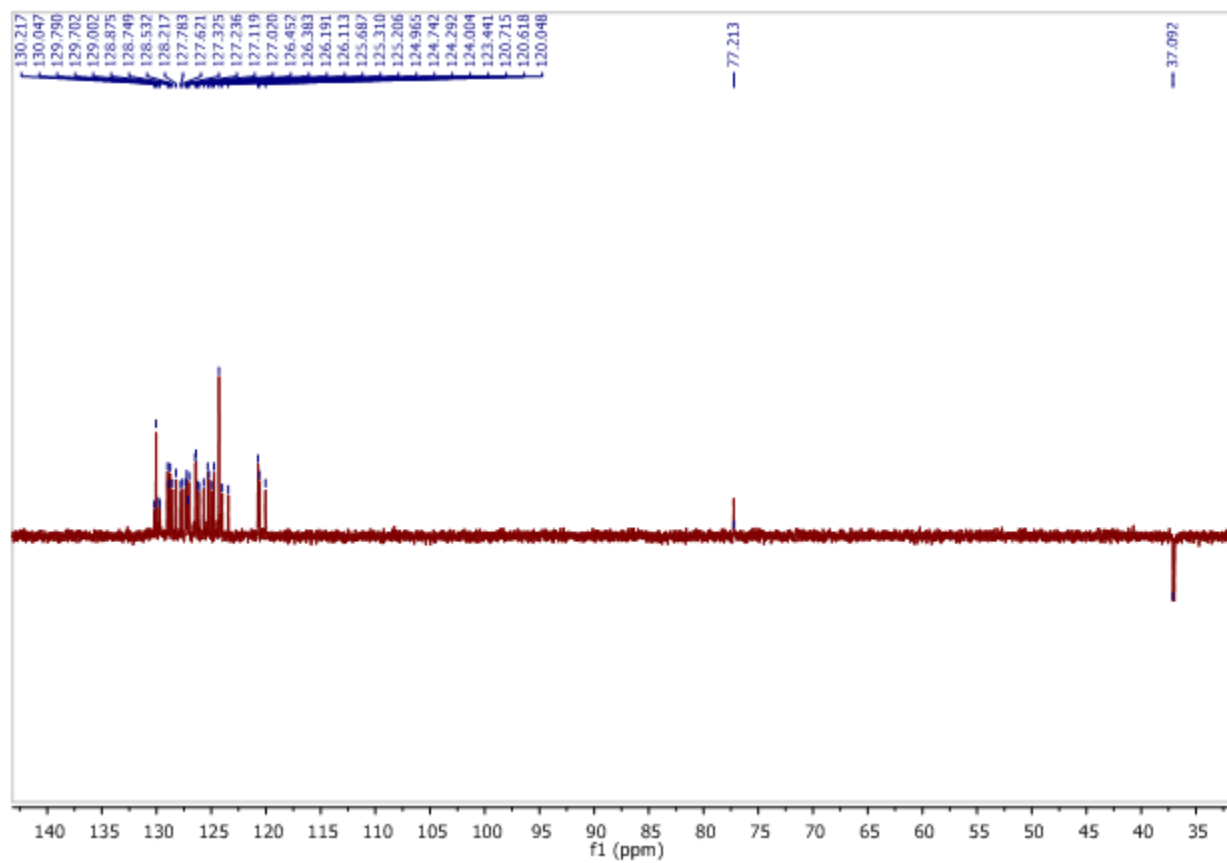

**$^1\text{H}$  NMR spectrum of 4-phenyl-2,6-di(pyren-1-yl)nicotinonitrile (6a)**

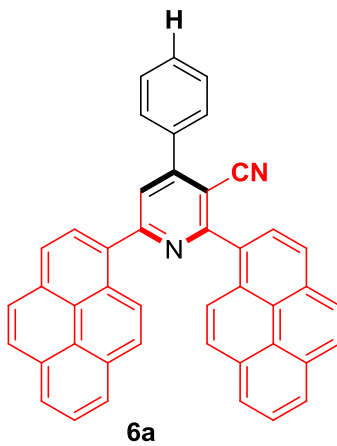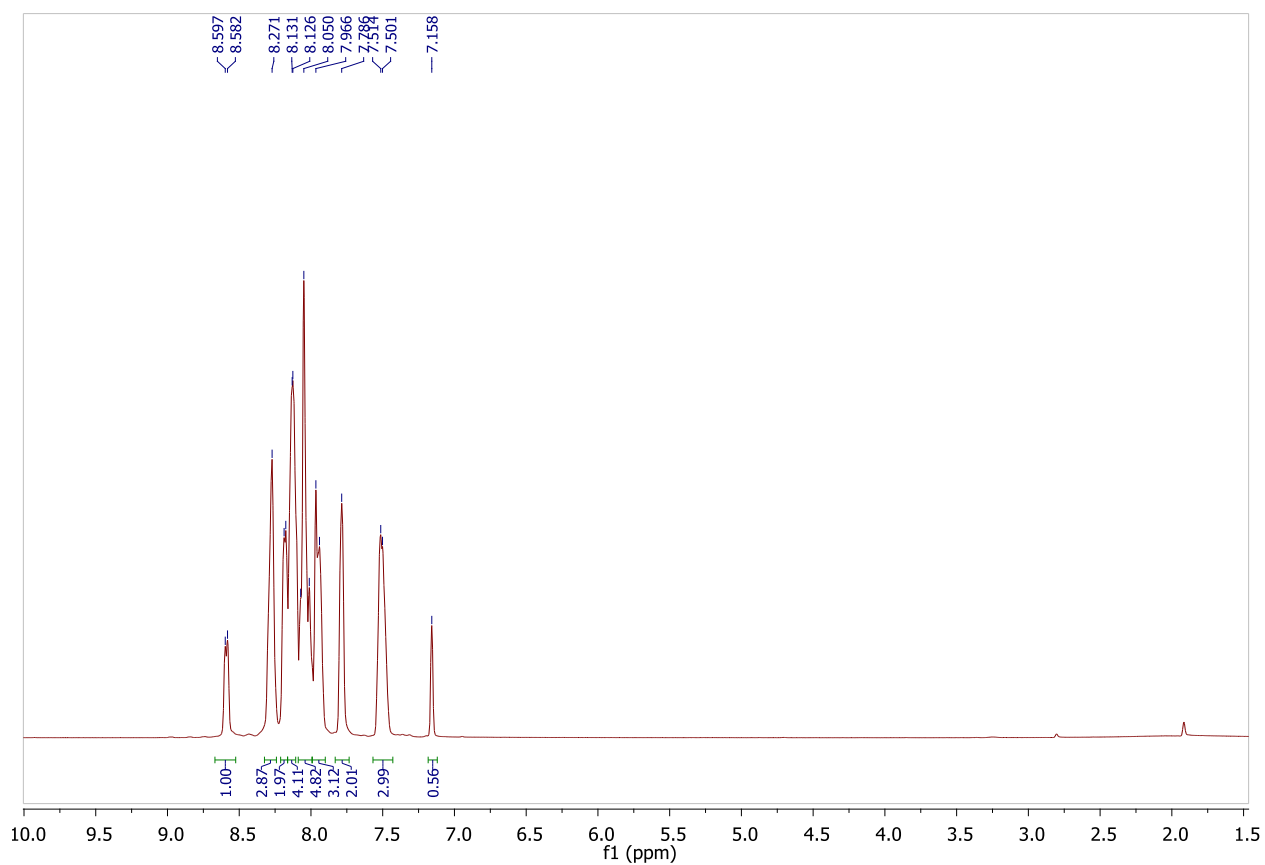

**$^{13}\text{C}$  NMR spectrum of 4-phenyl-2,6-di(pyren-1-yl)nicotinonitrile (6a)**

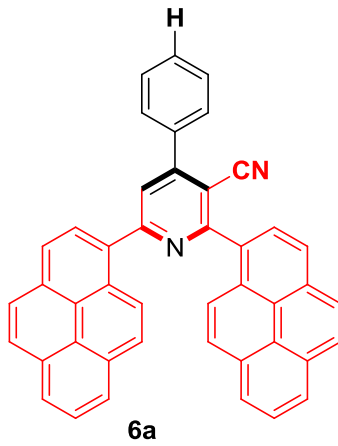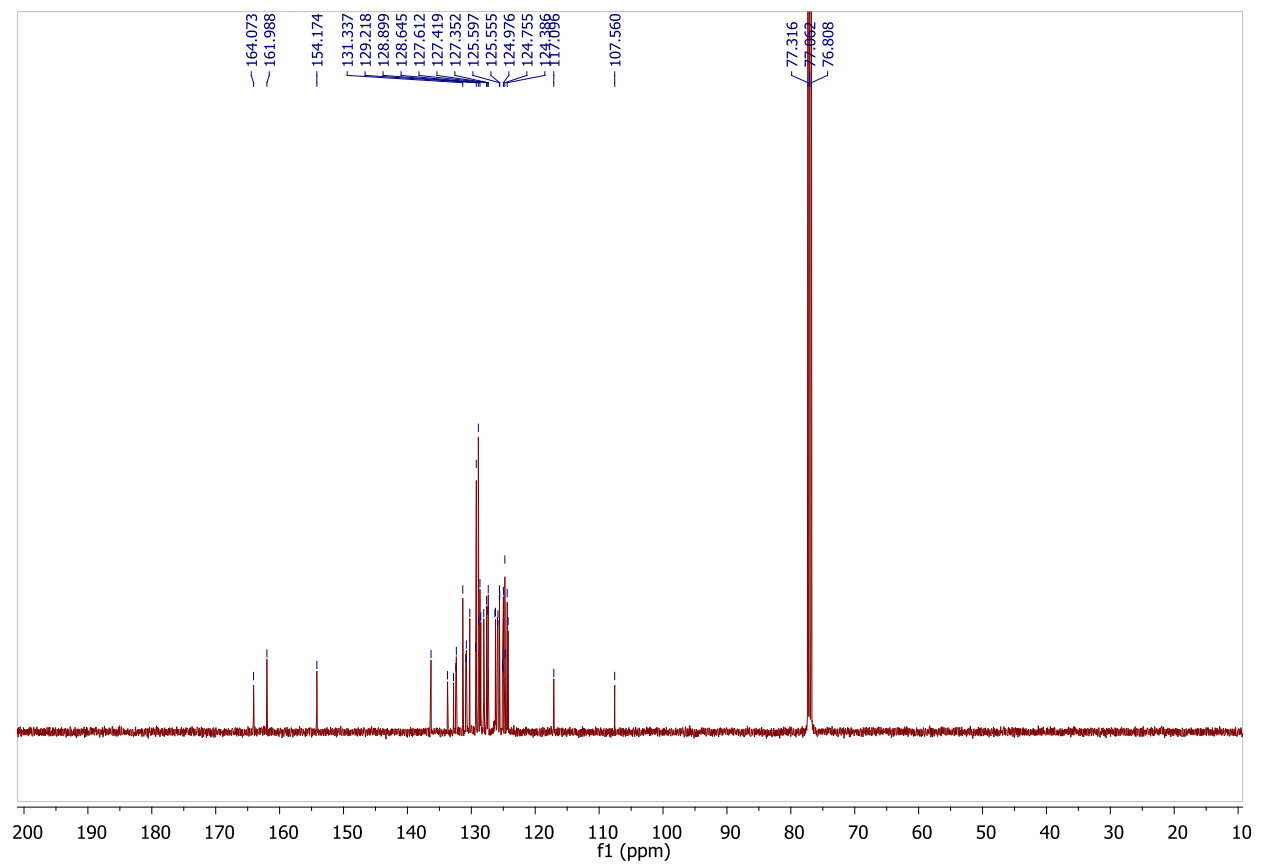

Expanded  $^{13}\text{C}$  NMR spectrum of 4-phenyl-2,6-di(pyren-1-yl)nicotinonitrile (6a)

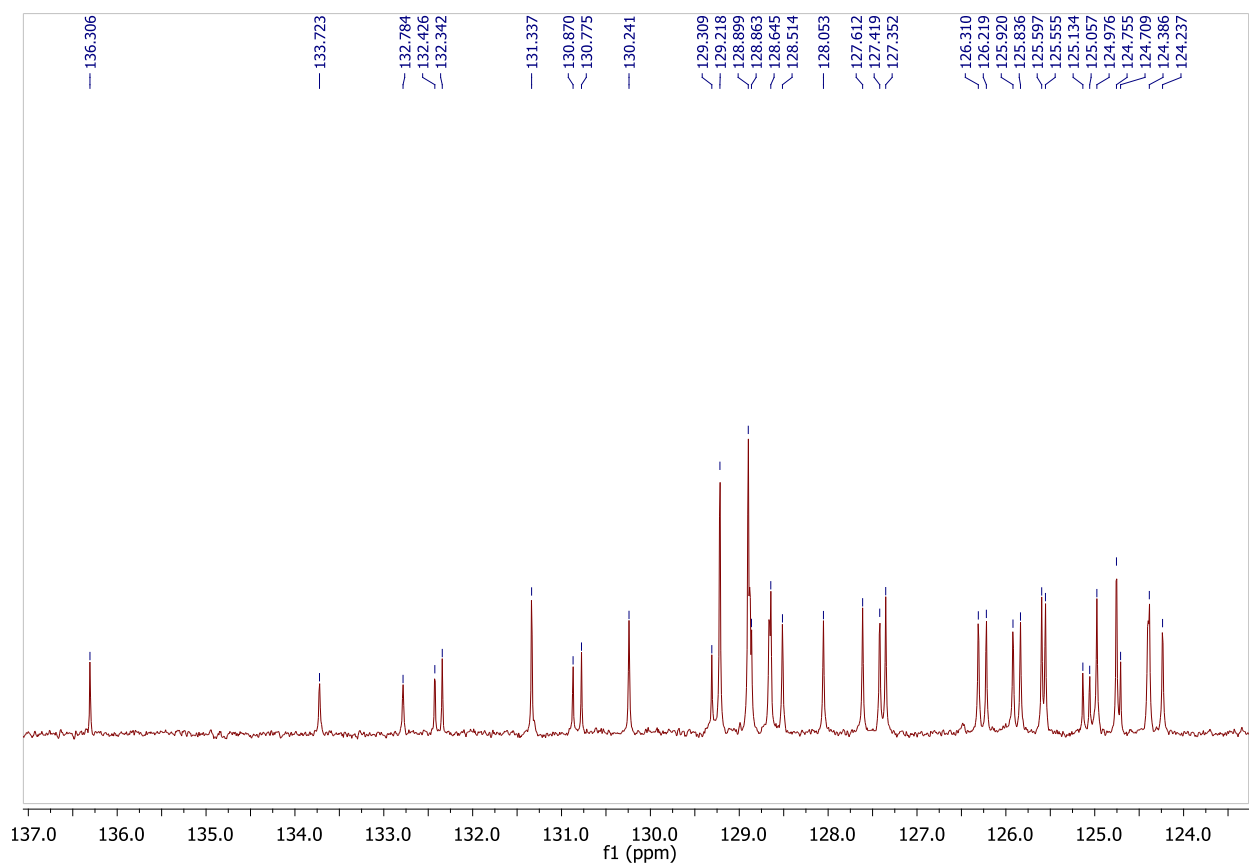

# DEPT-135 NMR spectrum of 4-phenyl-2,6-di(pyren-1-yl)nicotinonitrile (6a)

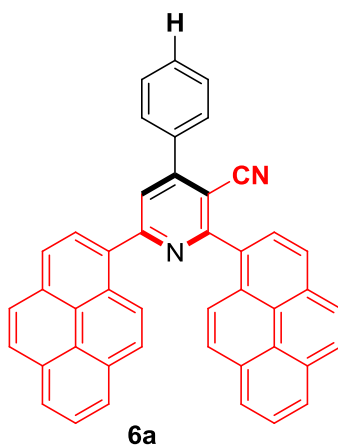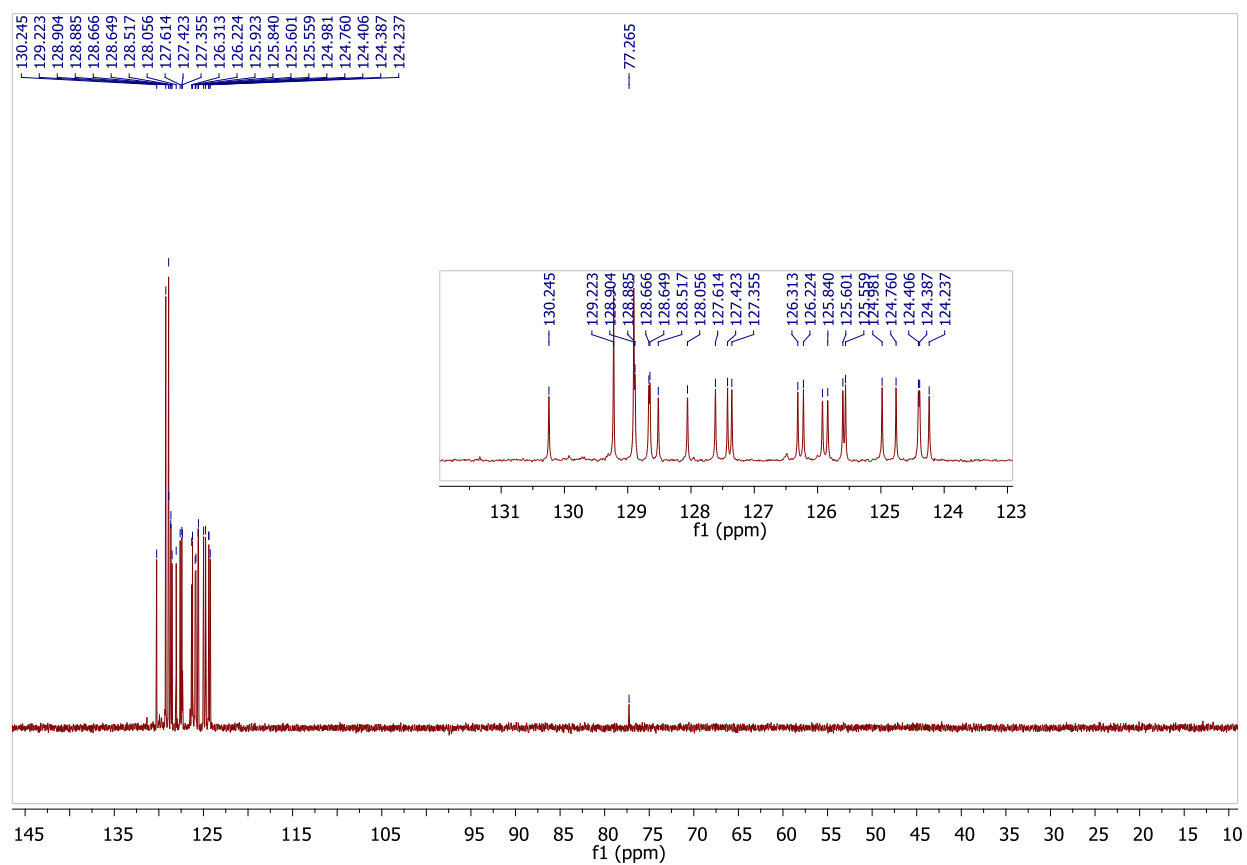

**<sup>1</sup>H NMR spectrum 4-(4-(dimethylamino)phenyl)-2,6-di(pyren-1-yl)nicotinitrile (6b)**

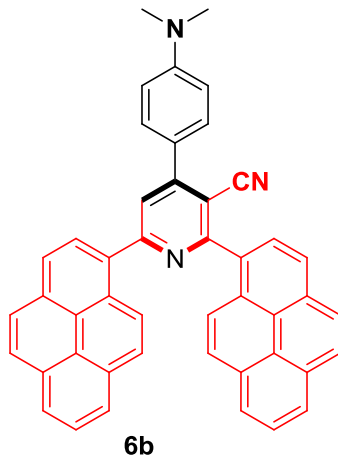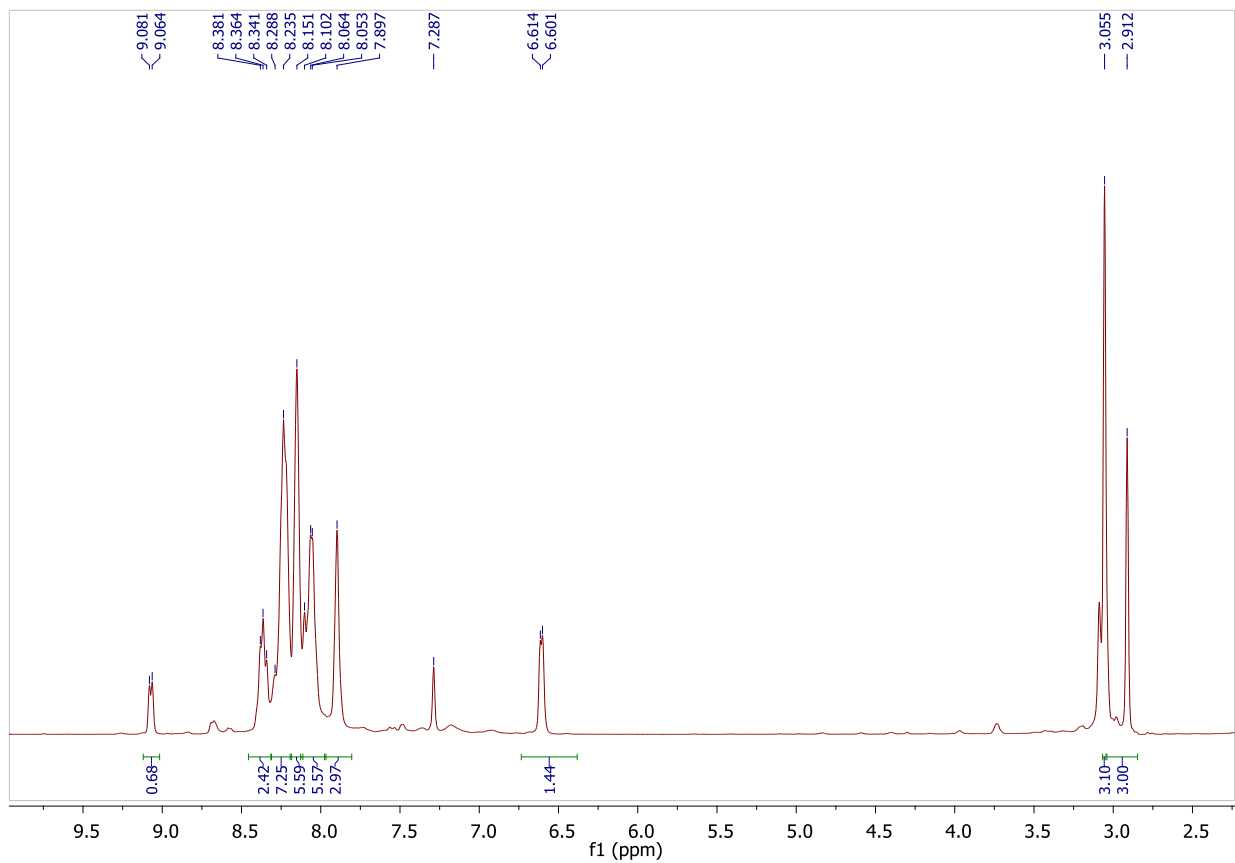

**<sup>13</sup>C NMR spectrum 4-(4-(dimethylamino)phenyl)-2,6-di(pyren-1-yl)nicotinonitrile (6b)**

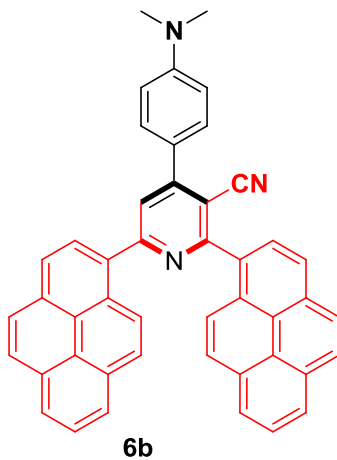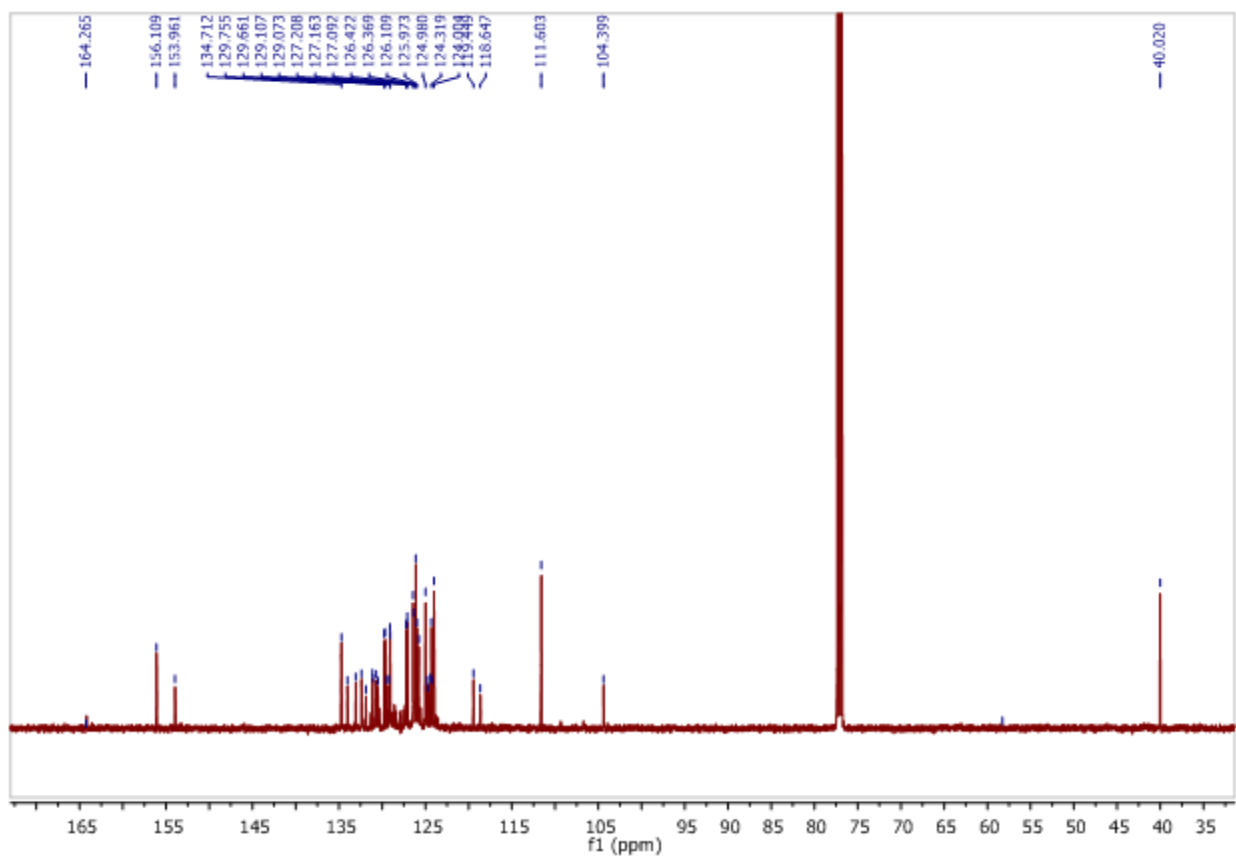

DEPT-135 NMR spectrum 4-(4-(dimethylamino)phenyl)-2,6-di(pyren-1-yl)nicotinonitrile

(6b)

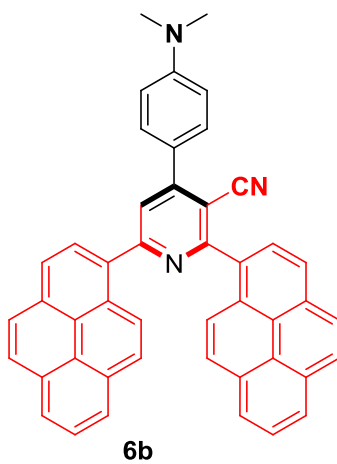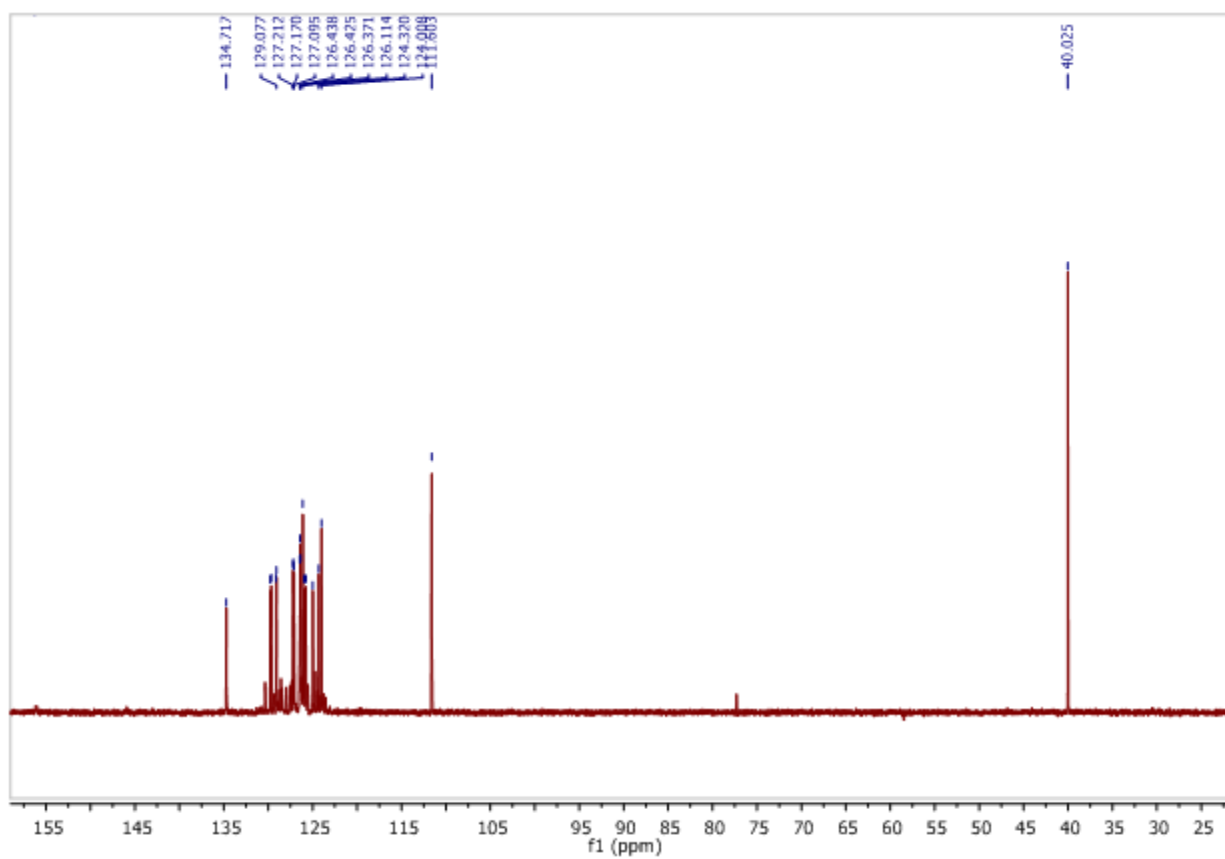



**<sup>1</sup>H NMR spectrum of 4-(4-methoxyphenyl)-2,6-di(pyren-1-yl)nicotinonitrile (6c)**

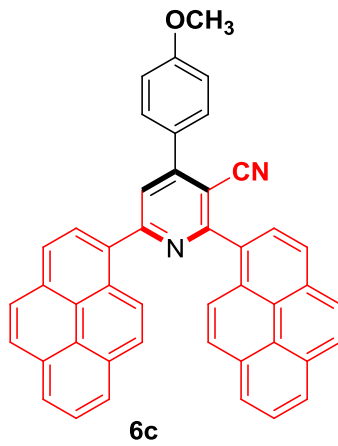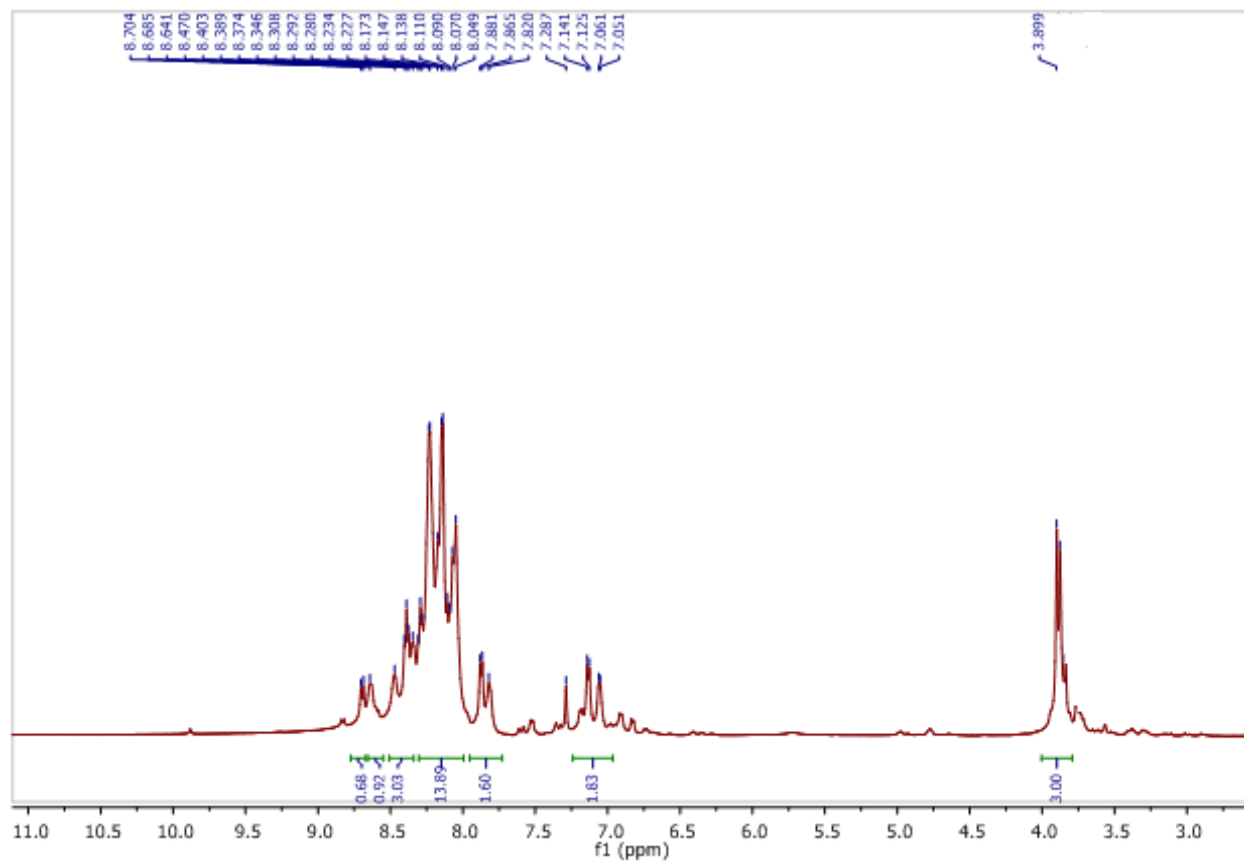

**<sup>13</sup>C NMR spectrum of 4-(4-methoxyphenyl)-2,6-di(pyren-1-yl)nicotinonitrile (6c)**

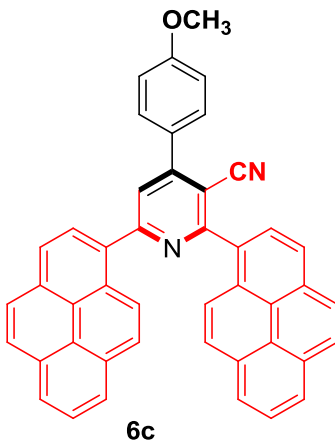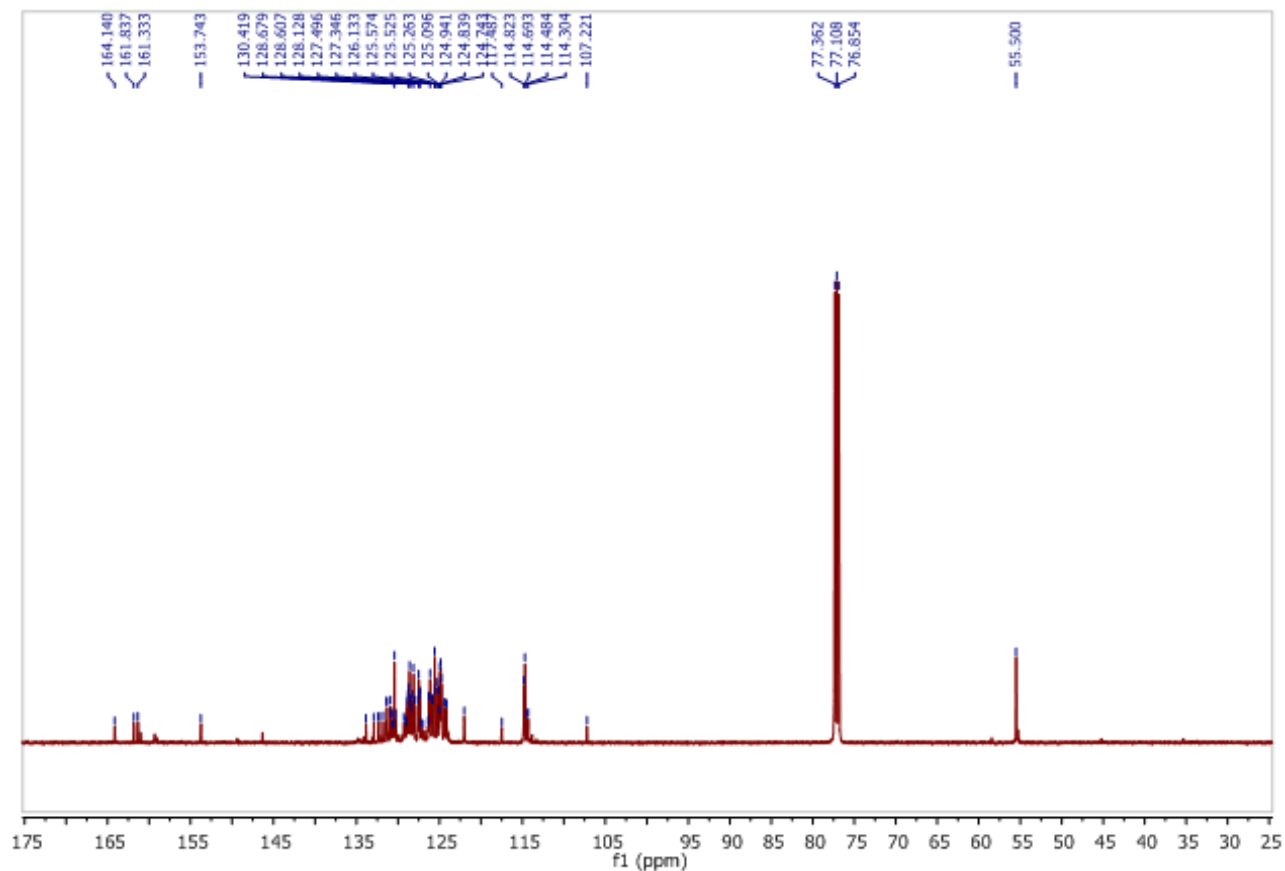

DEPT-135 NMR spectrum of 4-(4-methoxyphenyl)-2,6-di(pyren-1-yl)nicotinonitrile (6c)

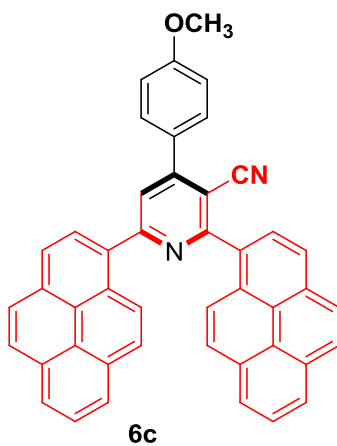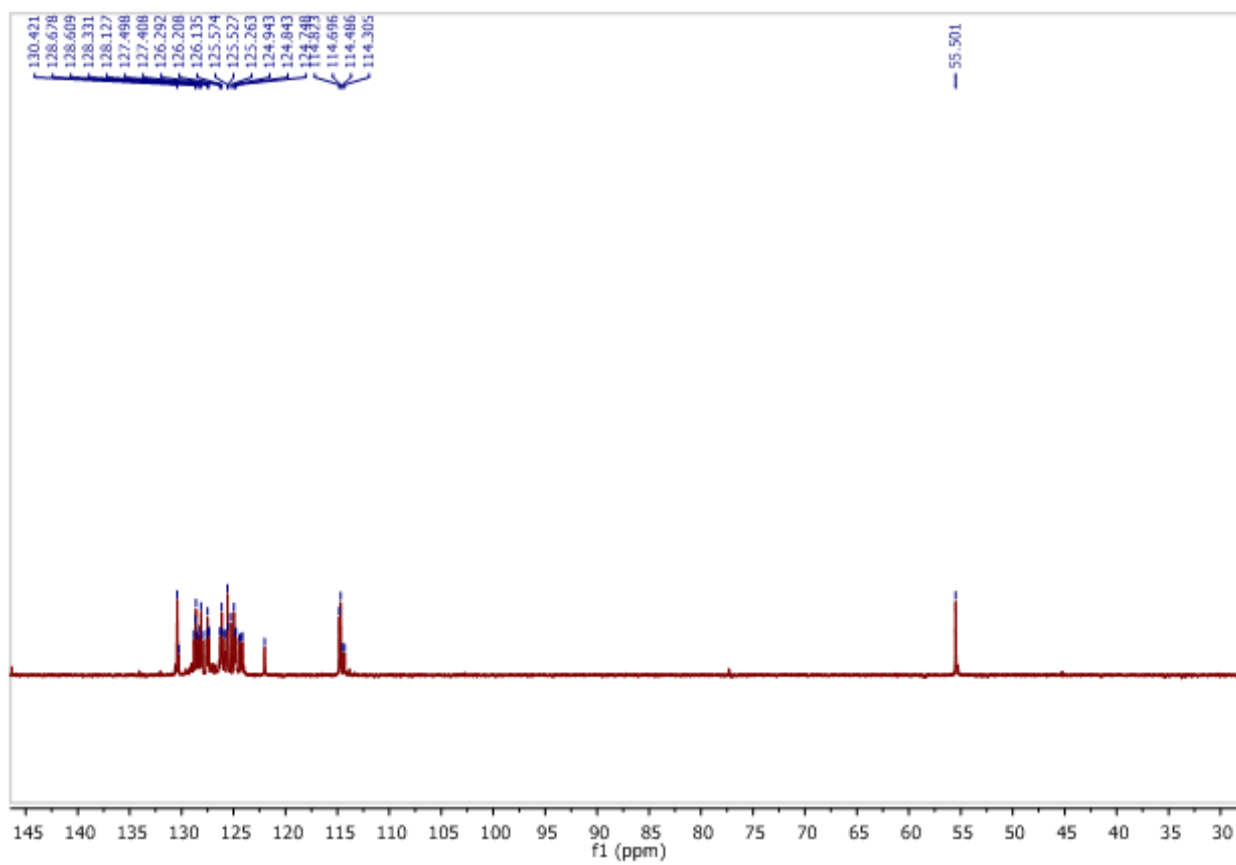

**<sup>1</sup>H NMR spectrum of 4-(4-chlorophenyl)-2,6-di(pyren-1-yl)nicotinonitrile (6d)**

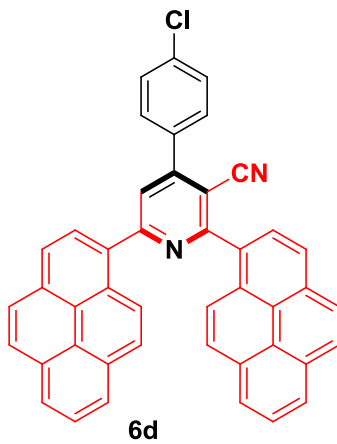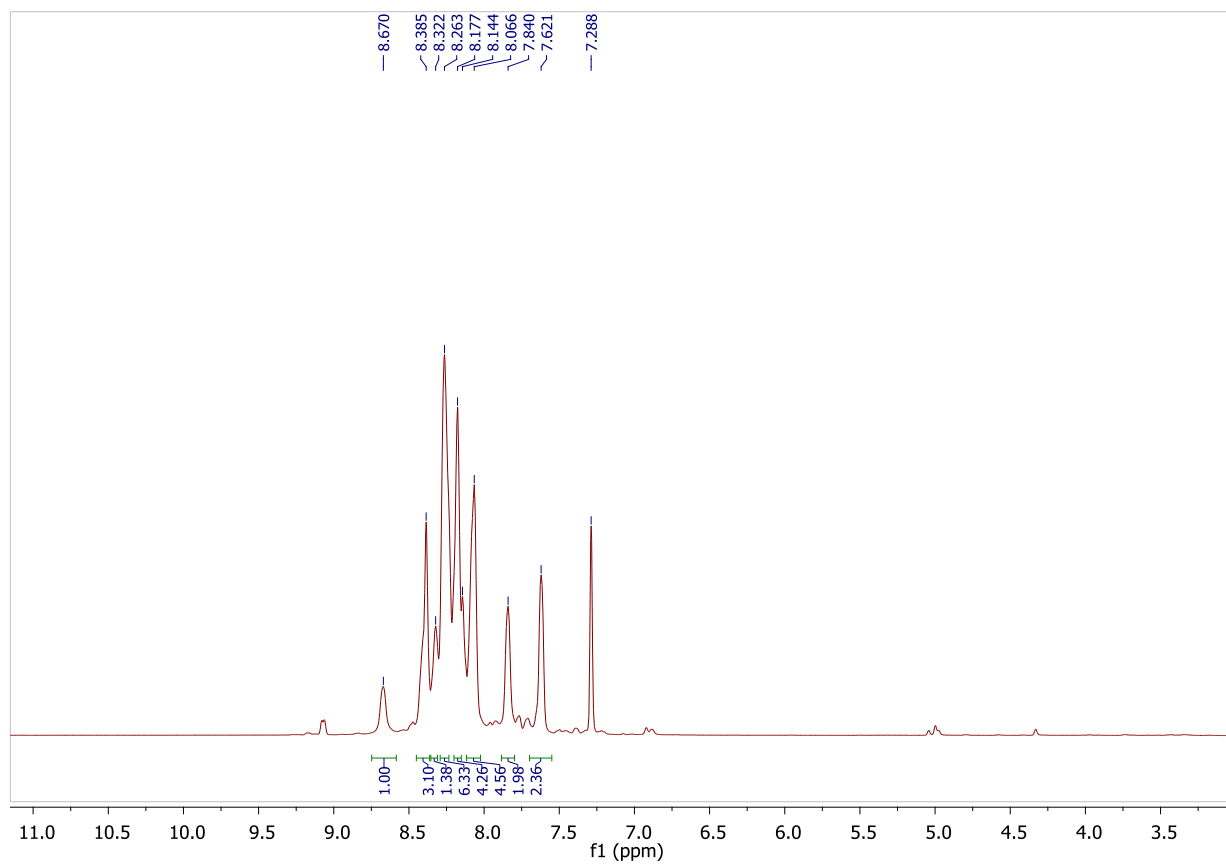

**$^{13}\text{C}$  NMR spectrum of 4-(4-chlorophenyl)-2,6-di(pyren-1-yl)nicotinonitrile (6d)**

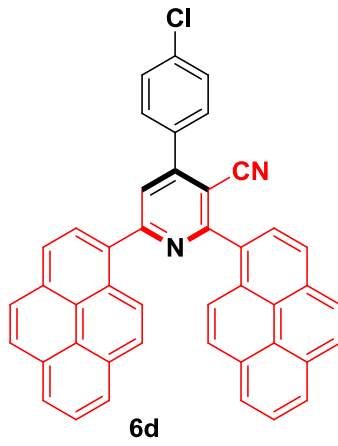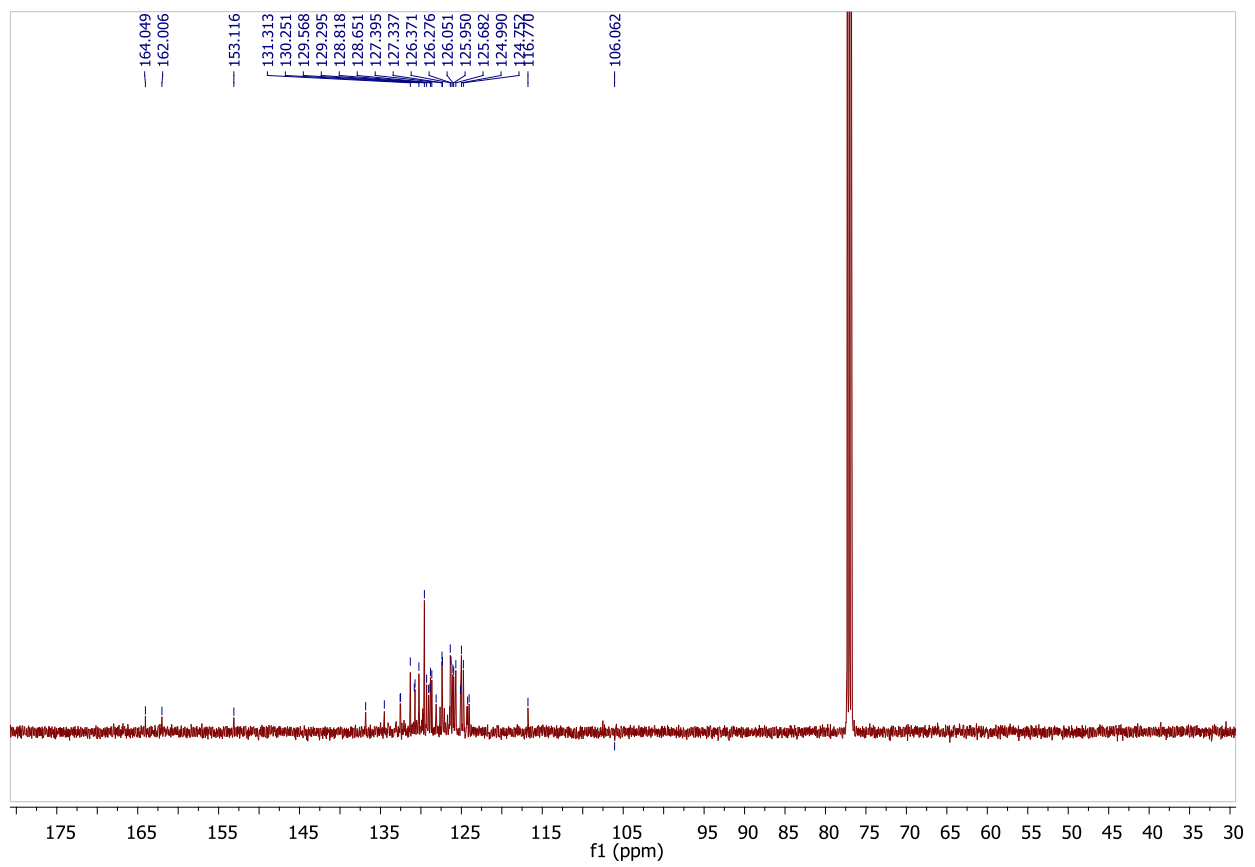

DEPT-135 NMR spectrum of 4-(4-chlorophenyl)-2,6-di(pyren-1-yl)nicotinonitrile (6d)

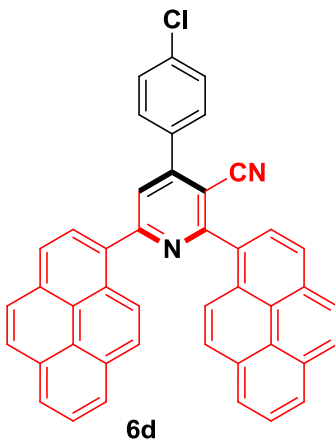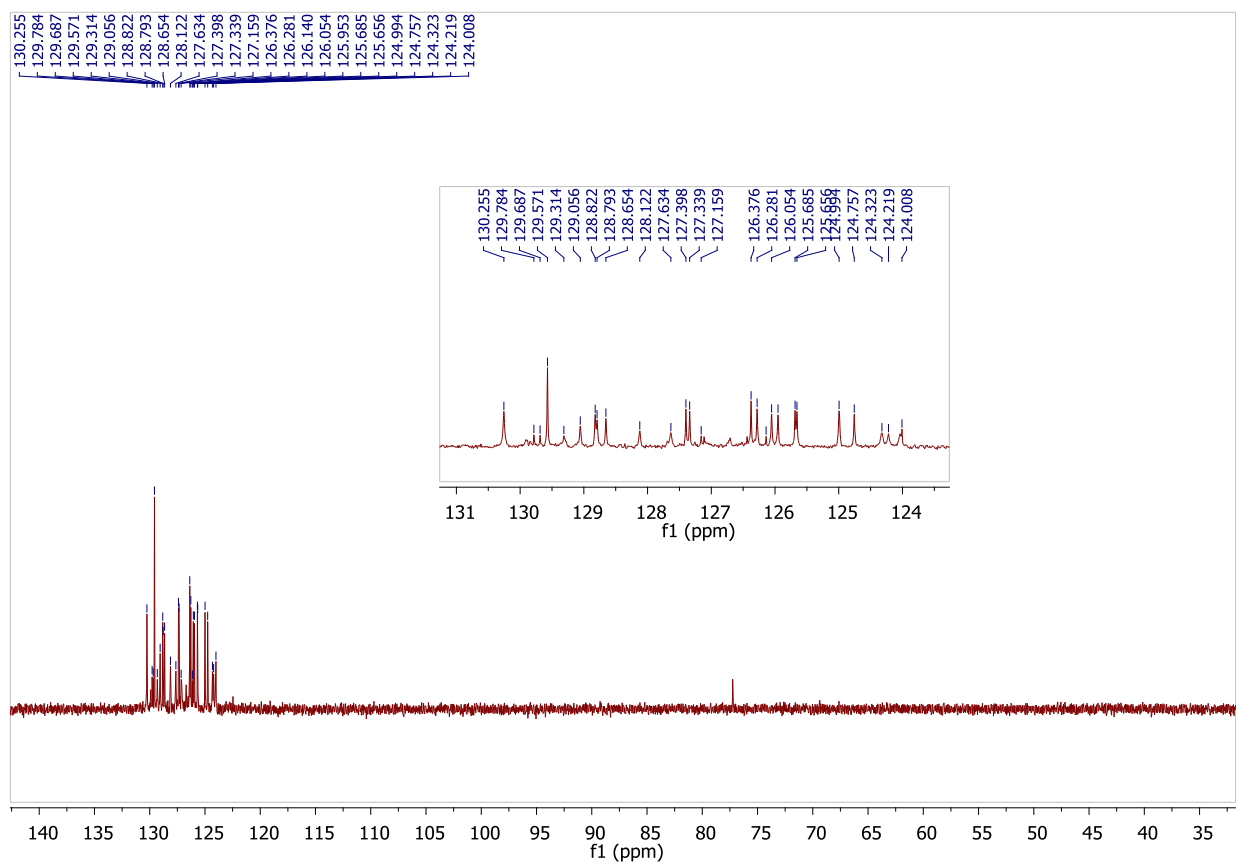

**<sup>1</sup>H NMR spectrum 4-(4-cyanophenyl)-2,6-di(pyren-1-yl)nicotinonitrile (6e)**

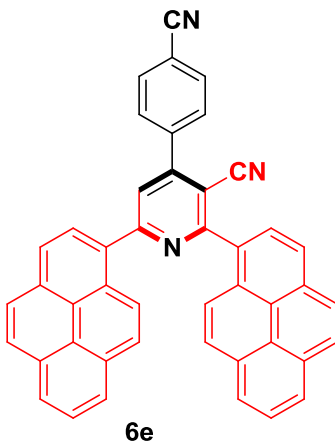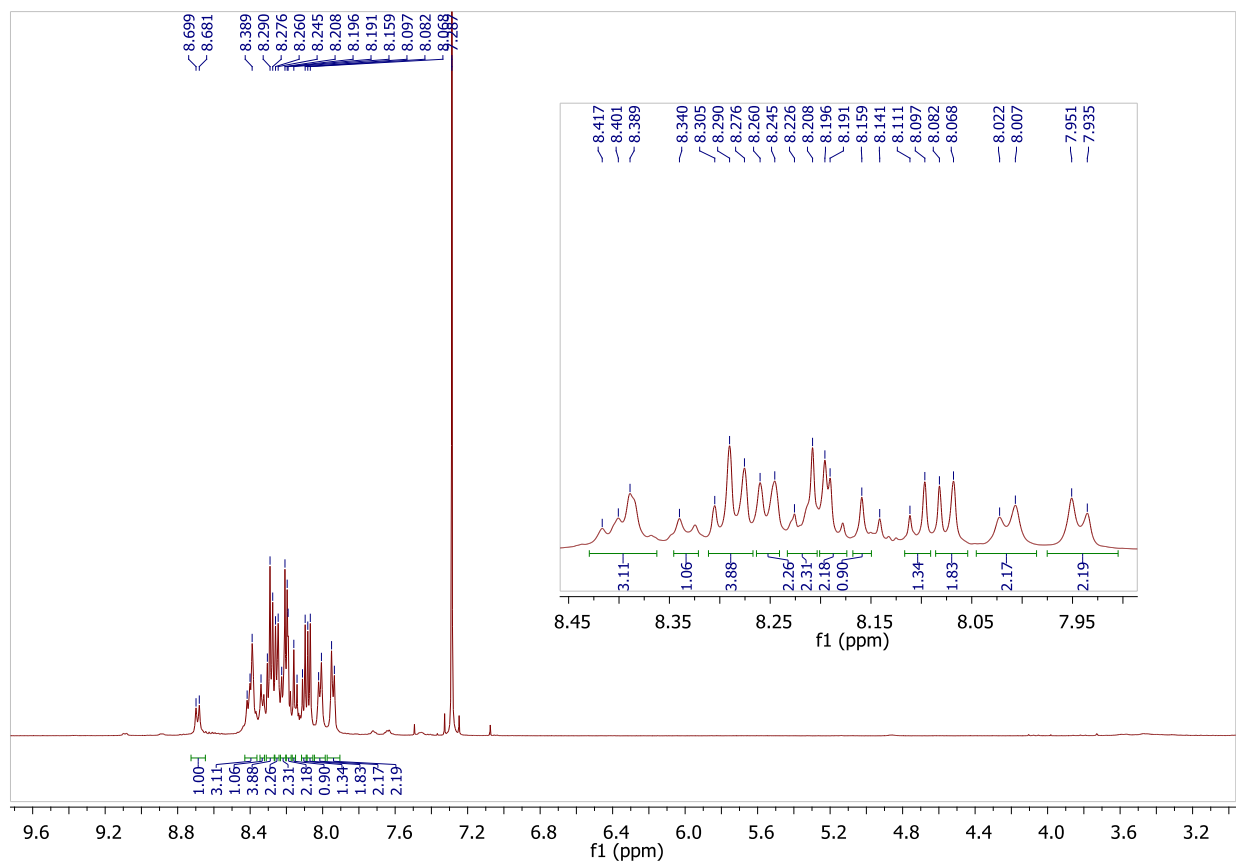

**<sup>13</sup>C NMR spectrum 4-(4-cyanophenyl)-2,6-di(pyren-1-yl)nicotinonitrile (6e)**

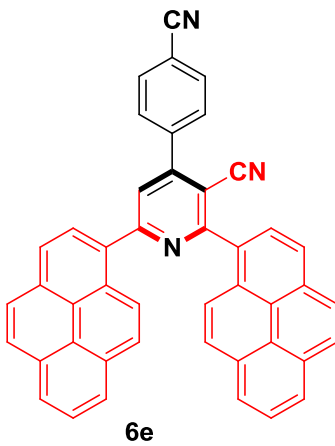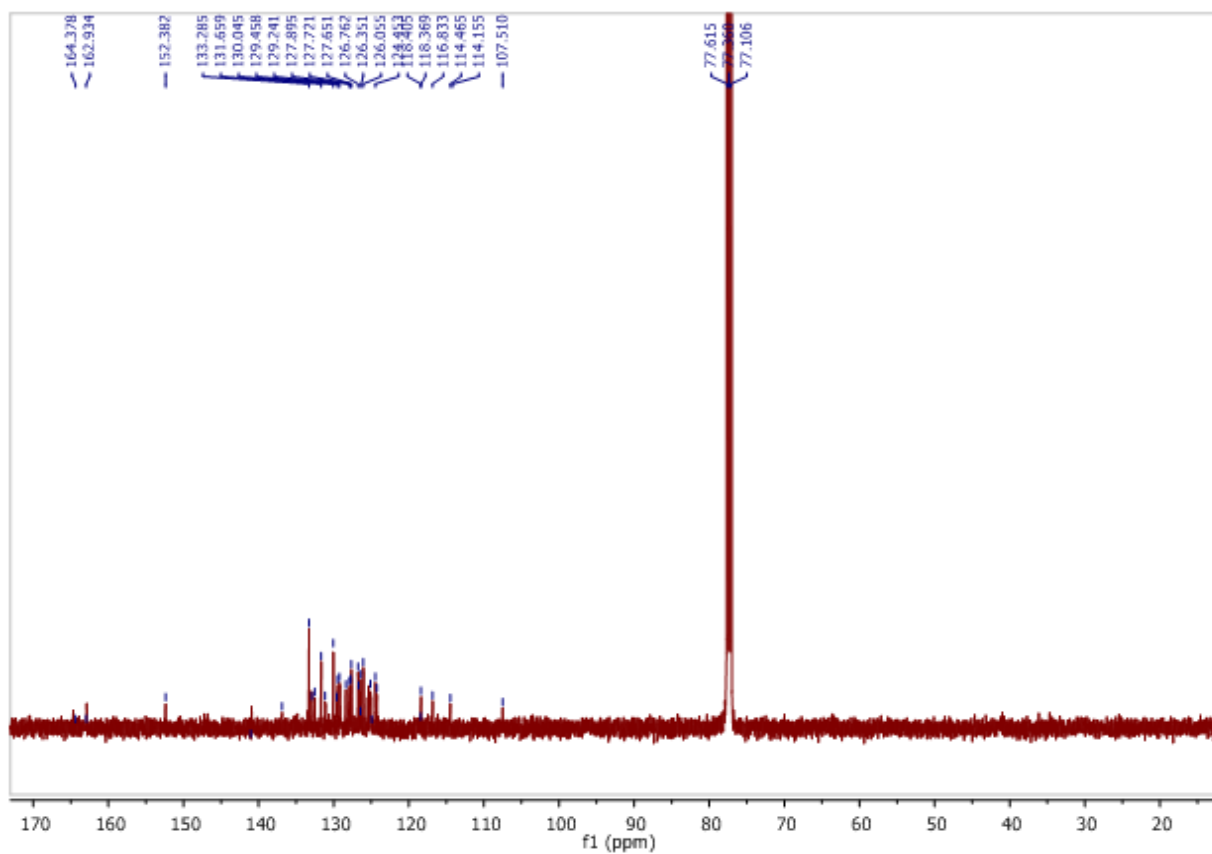



DEPT-135 NMR spectrum 4-(4-cyanophenyl)-2,6-di(pyren-1-yl)nicotinonitrile (6e)

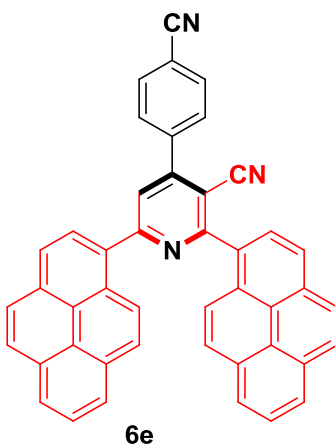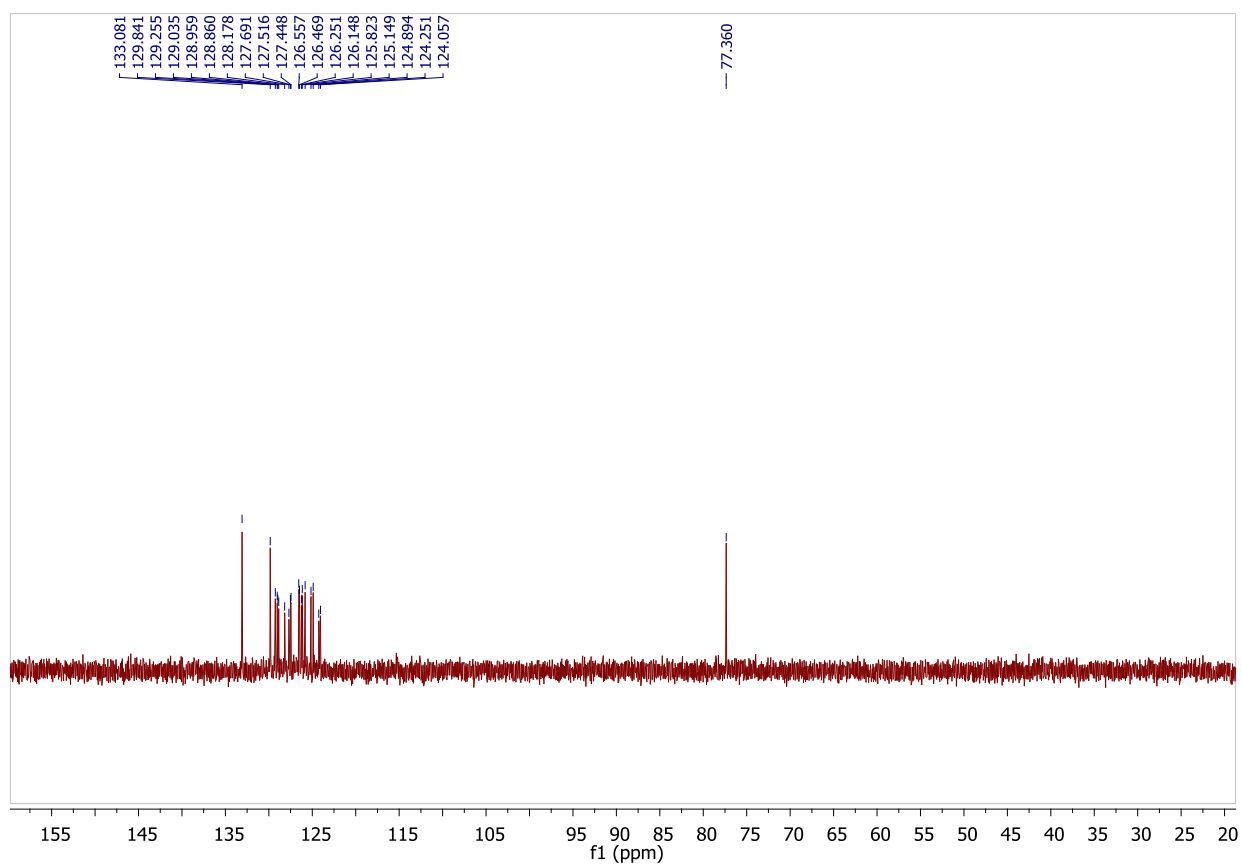



**$^{13}\text{C}$  NMR spectrum of 4-(4-nitrophenyl)-2,6-di(pyren-1-yl)nicotinonitrile (6f)**

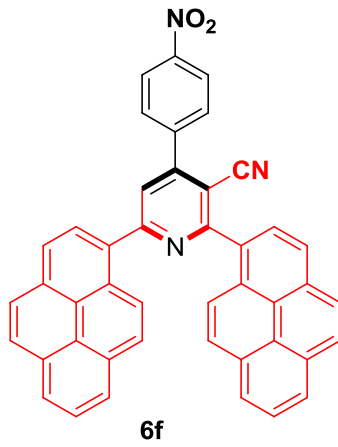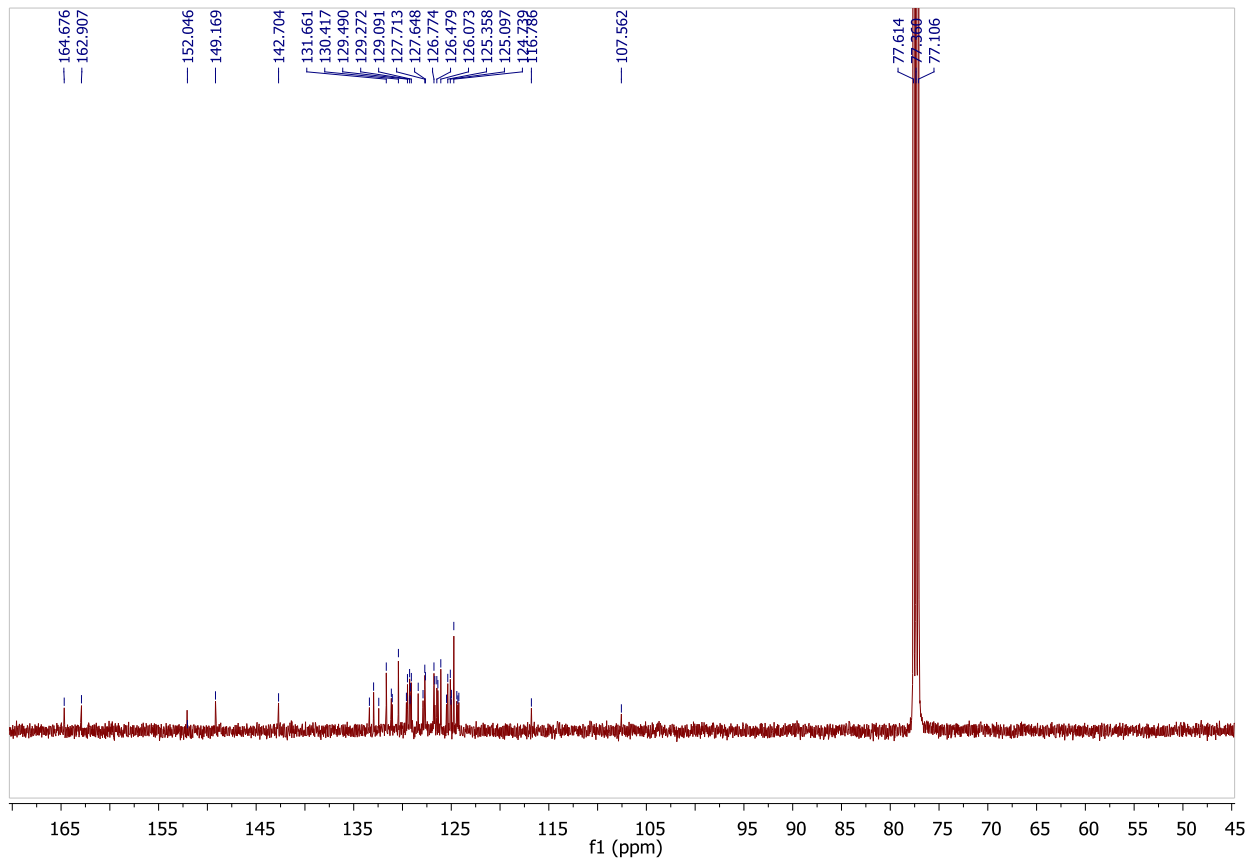

DEPT-135 NMR spectrum of 4-(4-nitrophenyl)-2,6-di(pyren-1-yl)nicotinonitrile (6f)

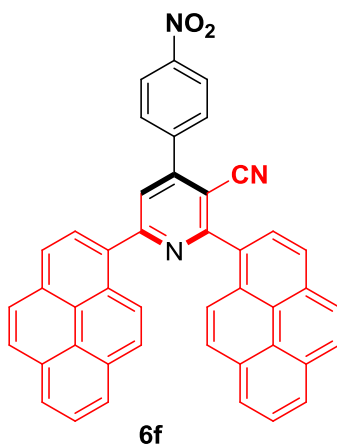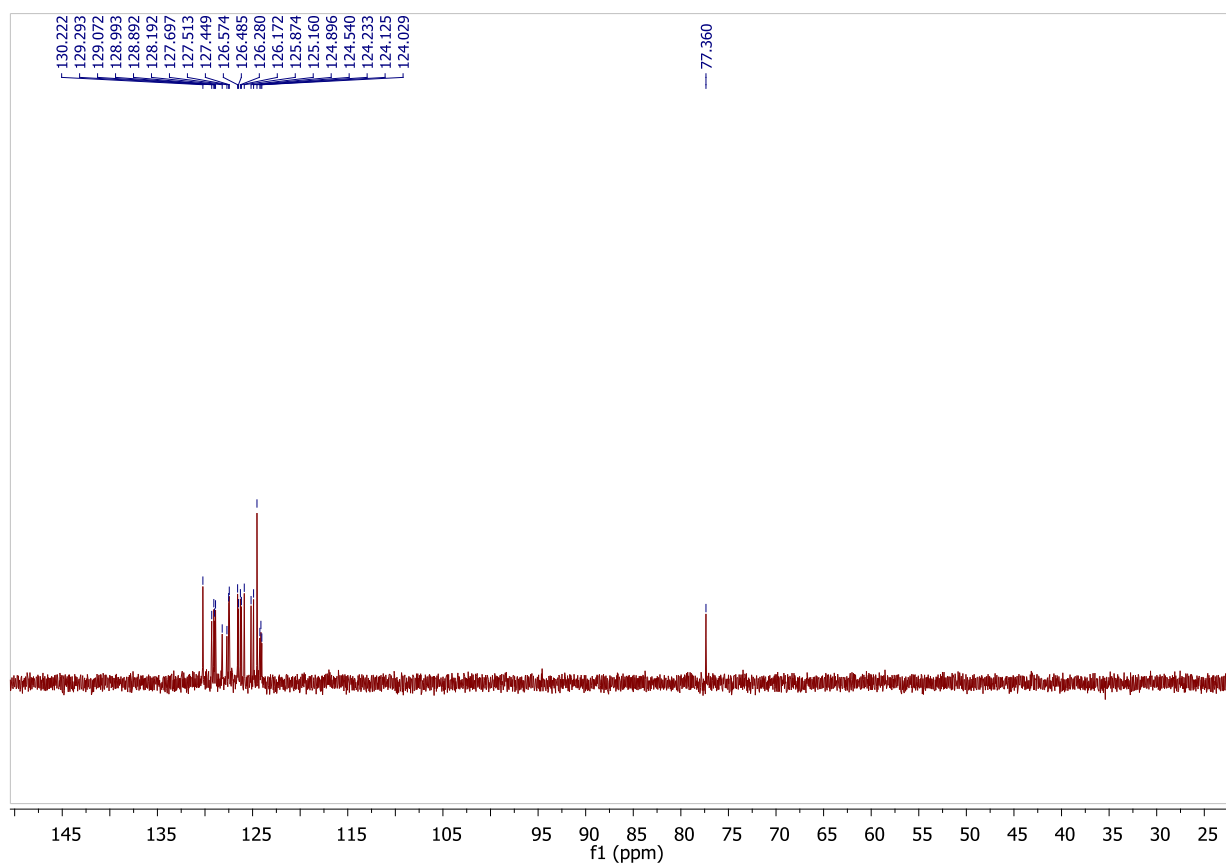

**<sup>1</sup>H NMR spectrum of 2,6-di(9H-fluoren-2-yl)-4-phenylnicotinonitrile (7a)**

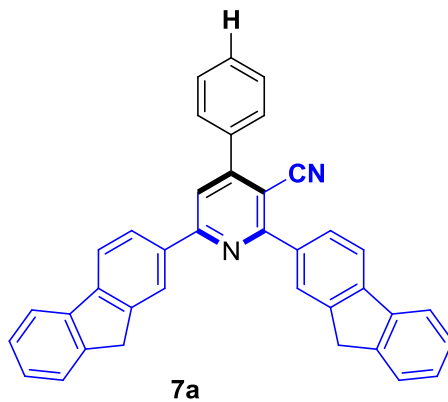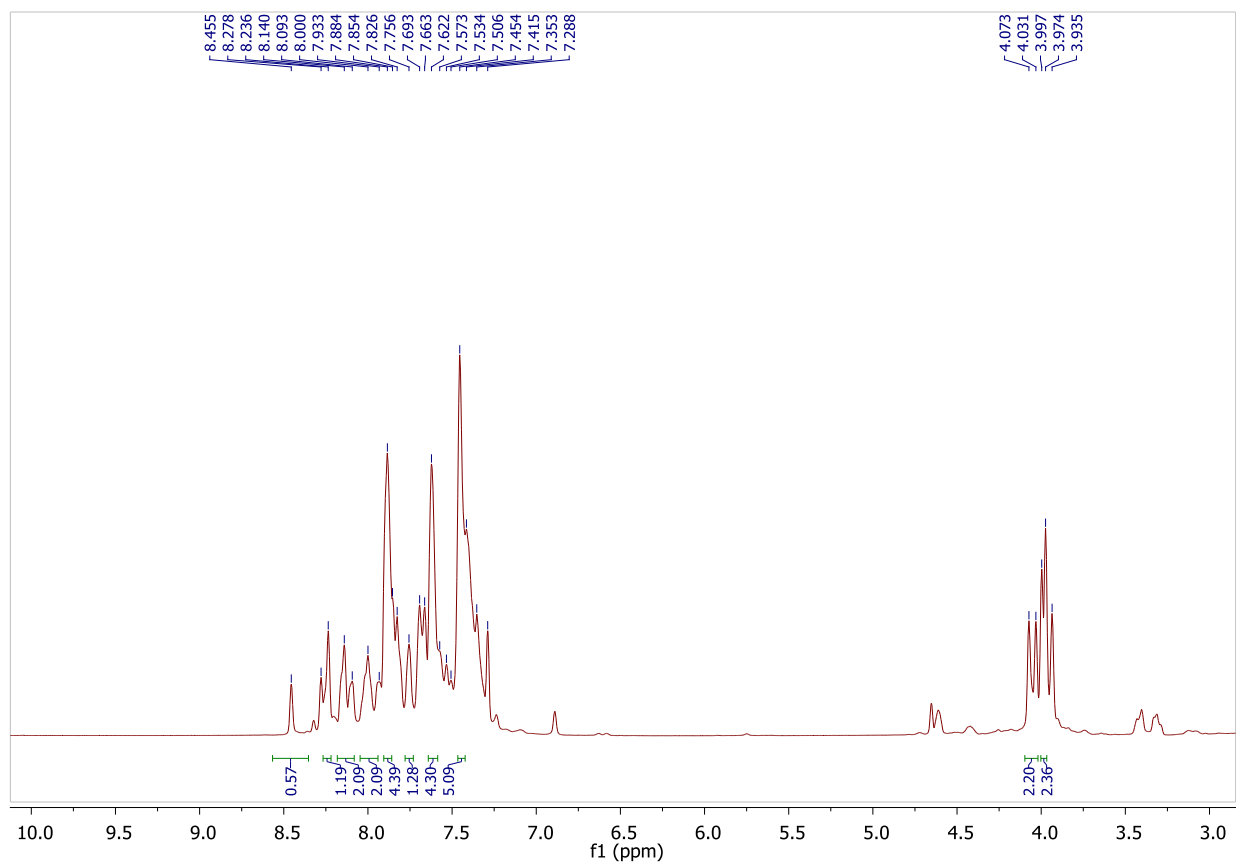

**<sup>13</sup>C NMR spectrum of 2,6-di(9*H*-fluoren-2-yl)-4-phenylnicotinonitrile (7a)**

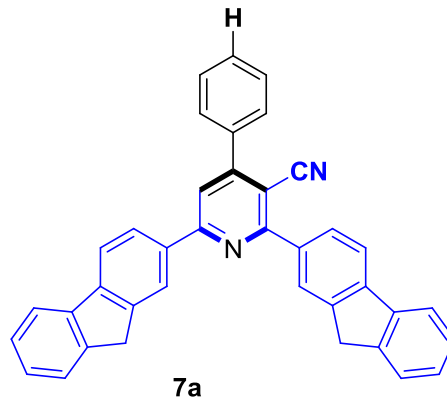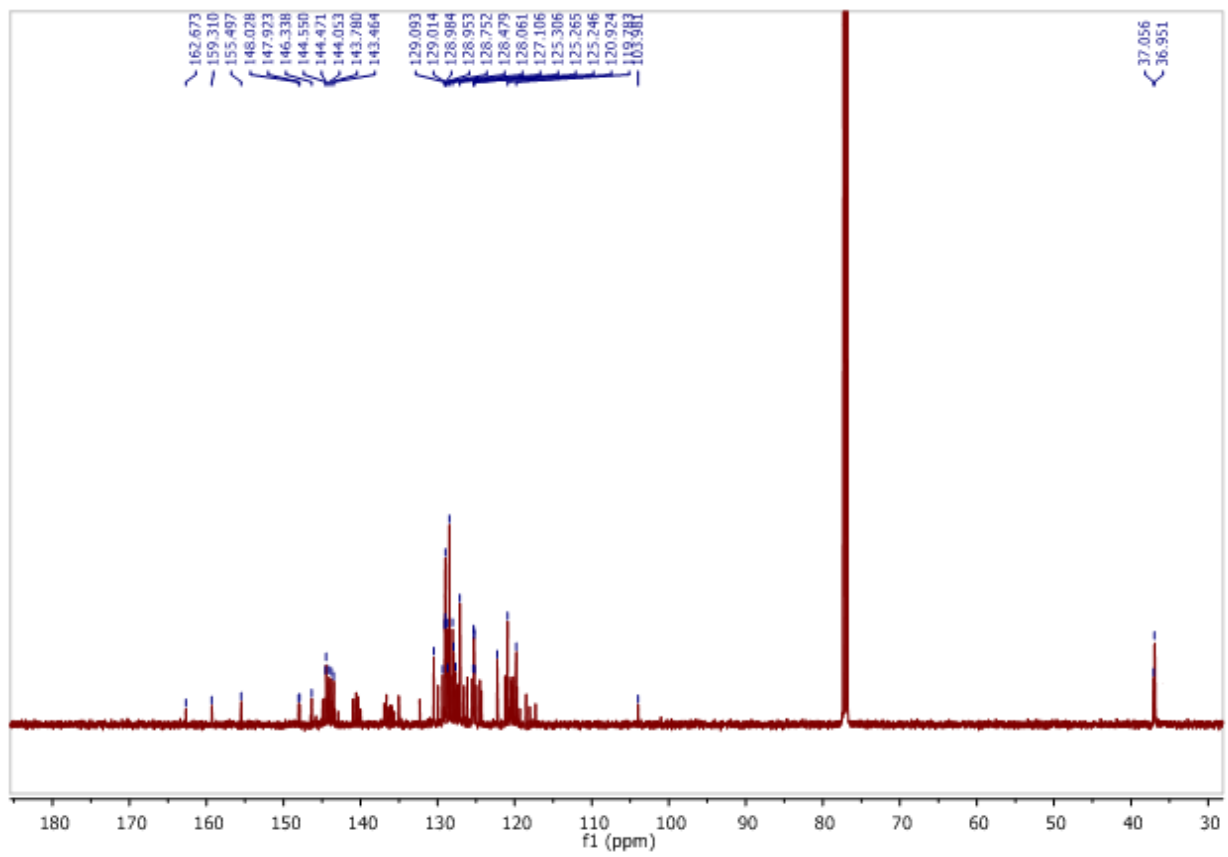

DEPT-135 NMR spectrum of 2,6-di(9*H*-fluoren-2-yl)-4-phenylnicotinonitrile (**7a**)

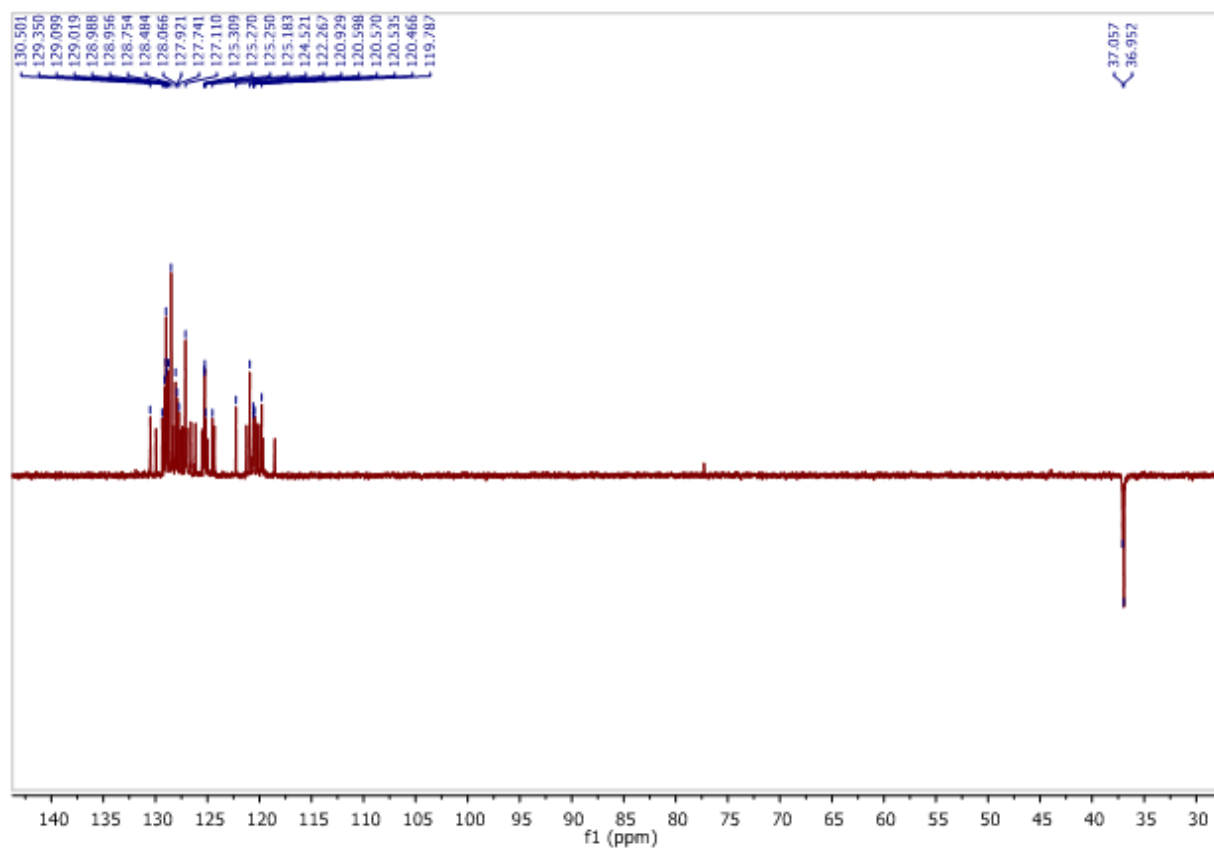

**<sup>1</sup>H NMR spectrum of 4-(4-(dimethylamino)phenyl)-2,6-di(9H-fluoren-2-yl)nicotinonitrile**

**(7b)**

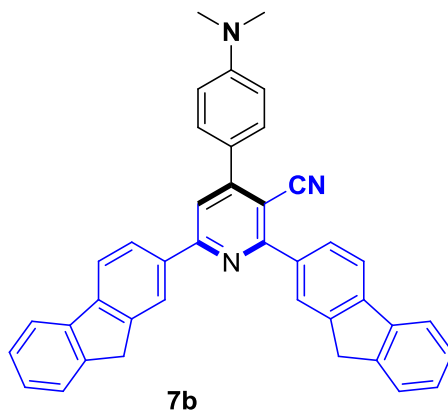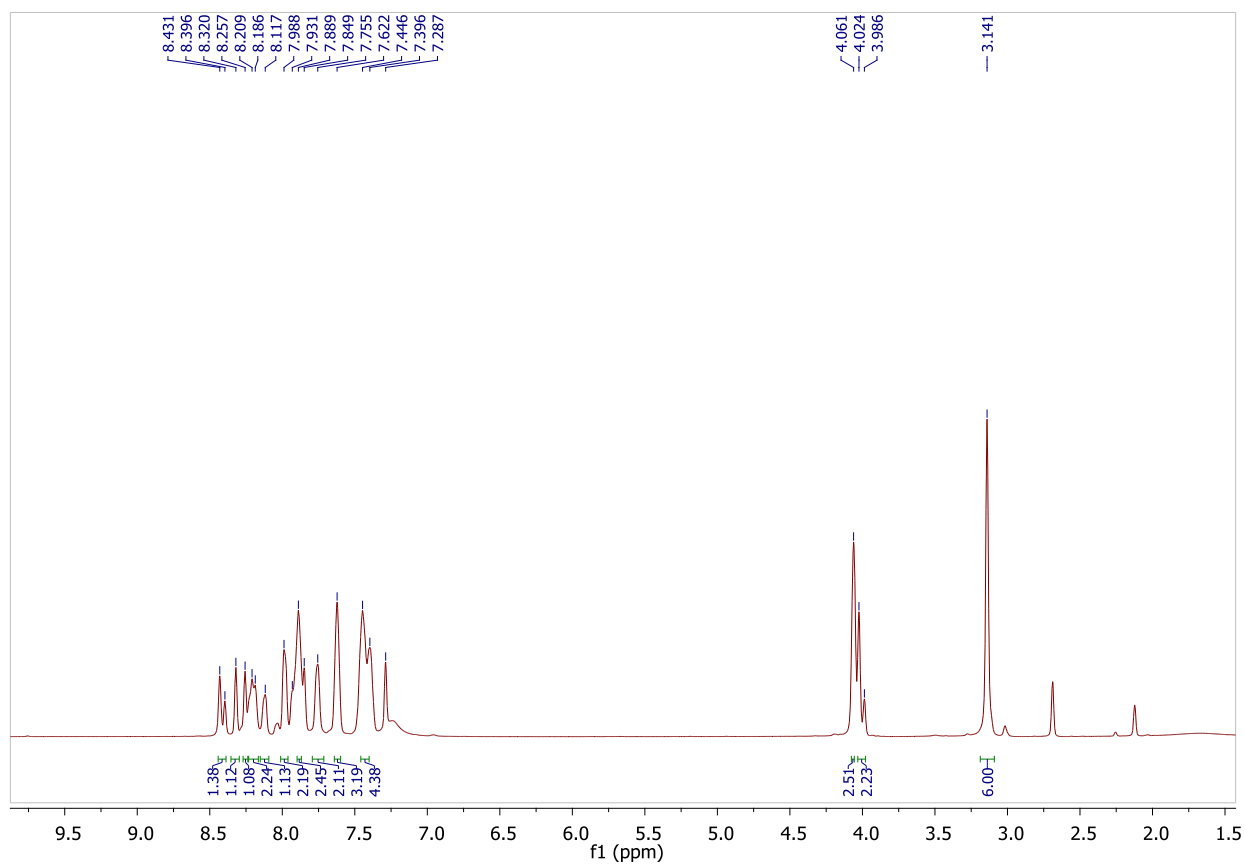



**<sup>13</sup>C NMR spectrum of 4-(4-(dimethylamino)phenyl)-2,6-di(9H-fluoren-2-yl)nicotinonitrile**

**(7b)**

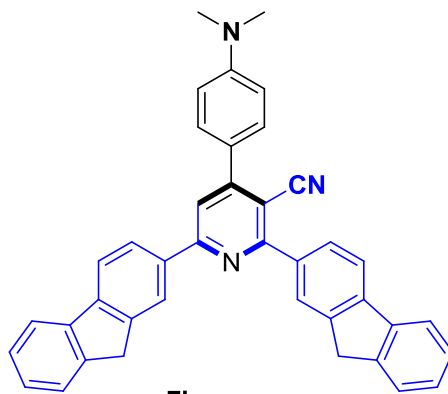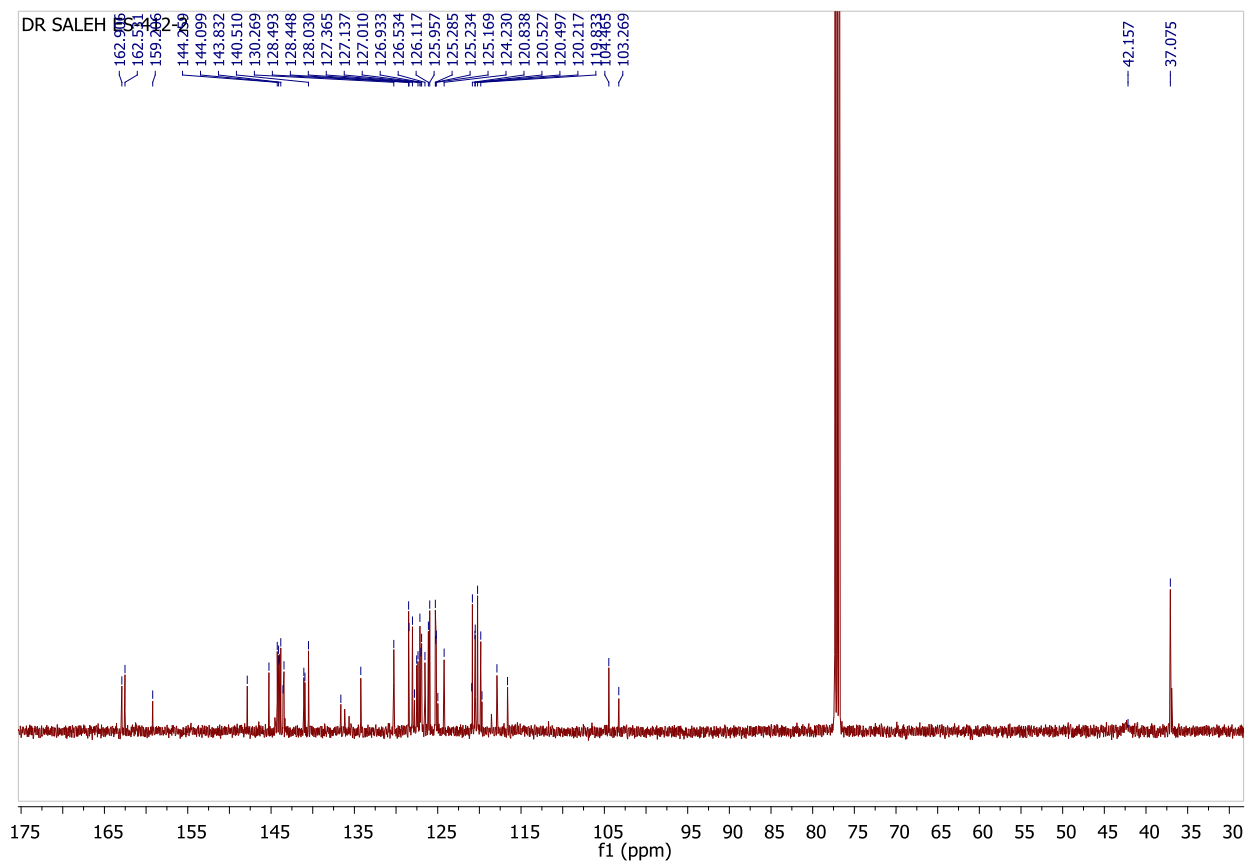

DEPT-135 NMR spectrum of 4-(4-(dimethylamino)phenyl)-2,6-di(9H-fluoren-2-yl)nicotinonitrile (7b)

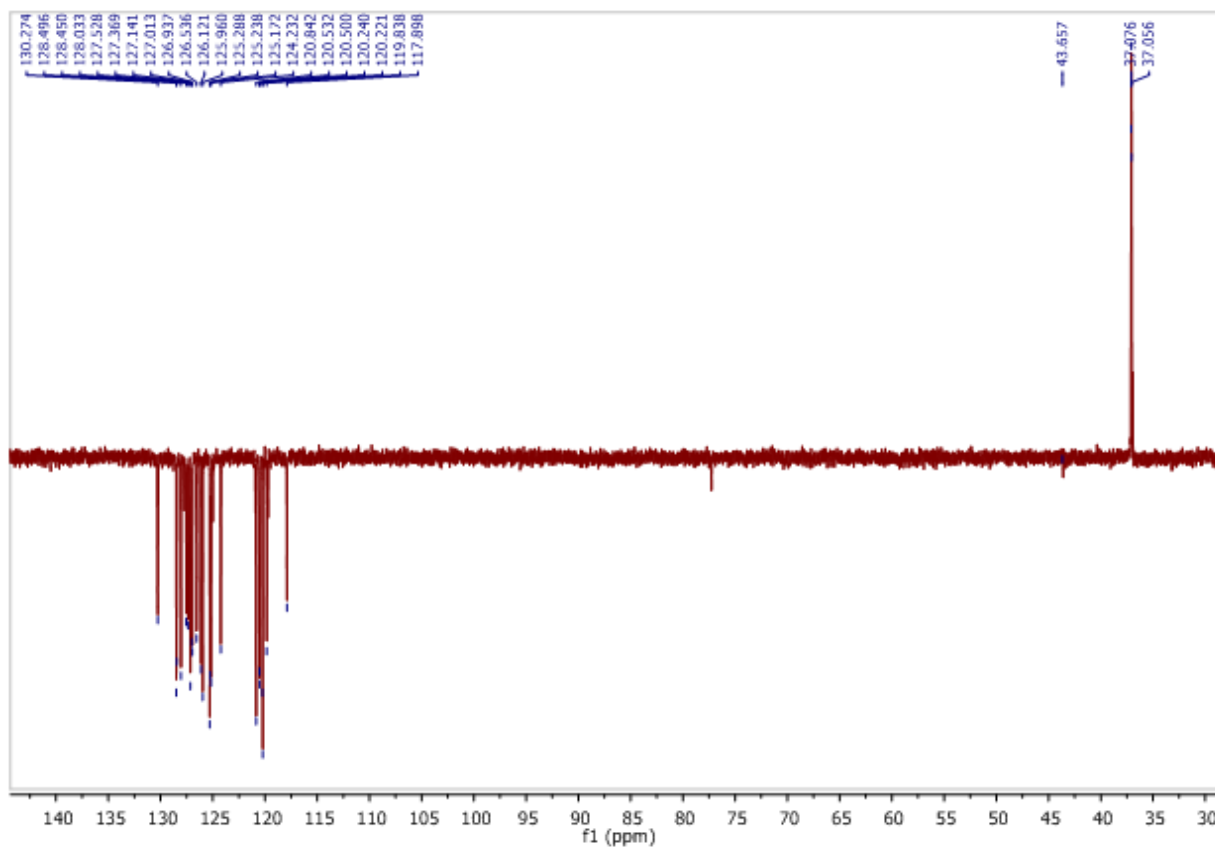

**<sup>1</sup>H NMR spectrum of 2,6-di(9H-fluoren-2-yl)-4-(4-methoxyphenyl)nicotinonitrile (7c)**

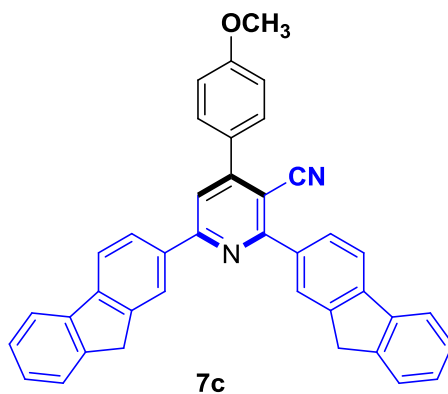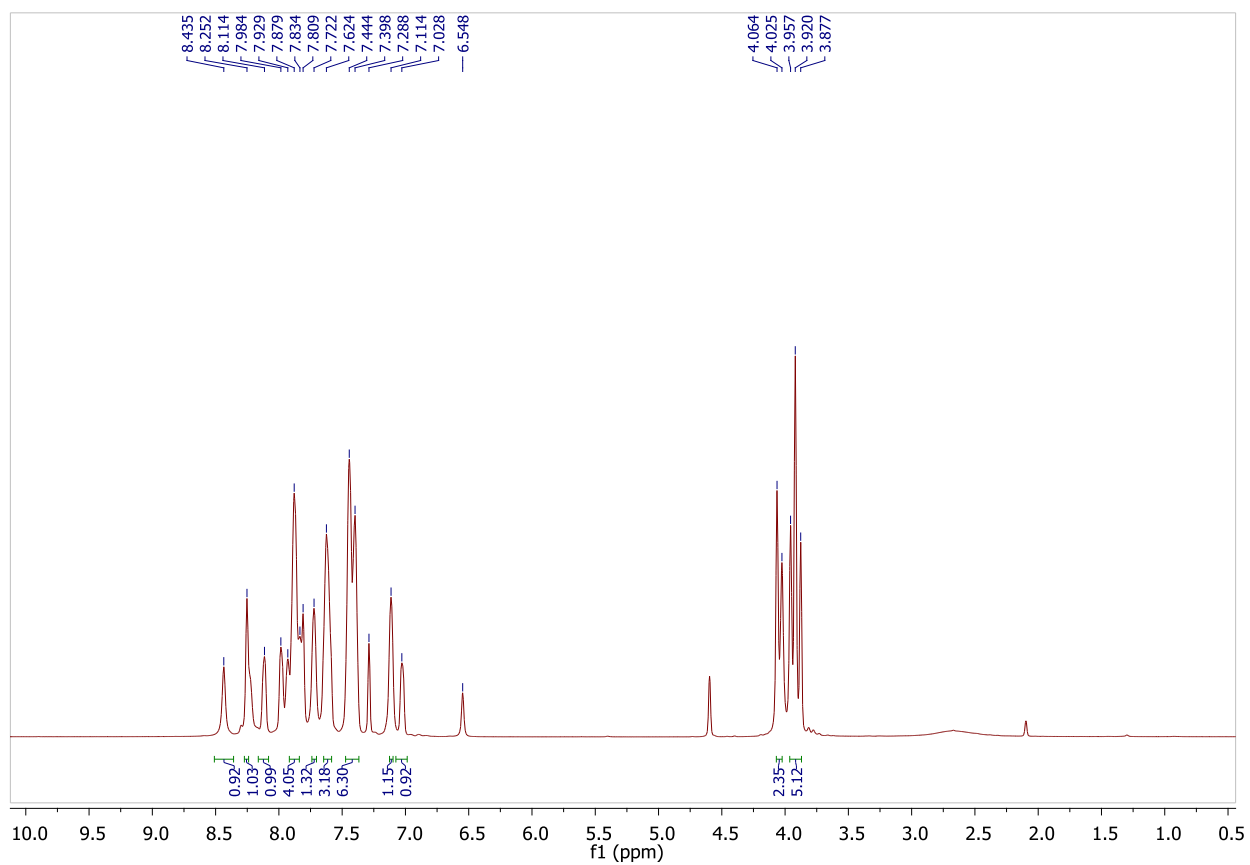

**<sup>13</sup>C NMR spectrum of 2,6-di(9H-fluoren-2-yl)-4-(4-methoxyphenyl)nicotinonitrile (7c)**

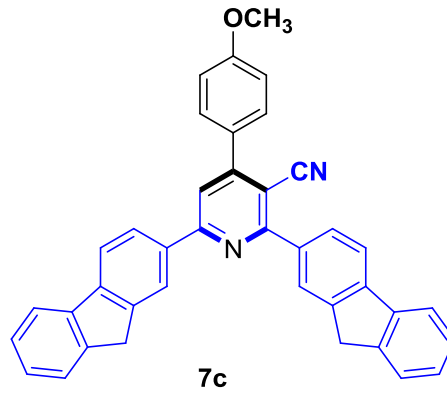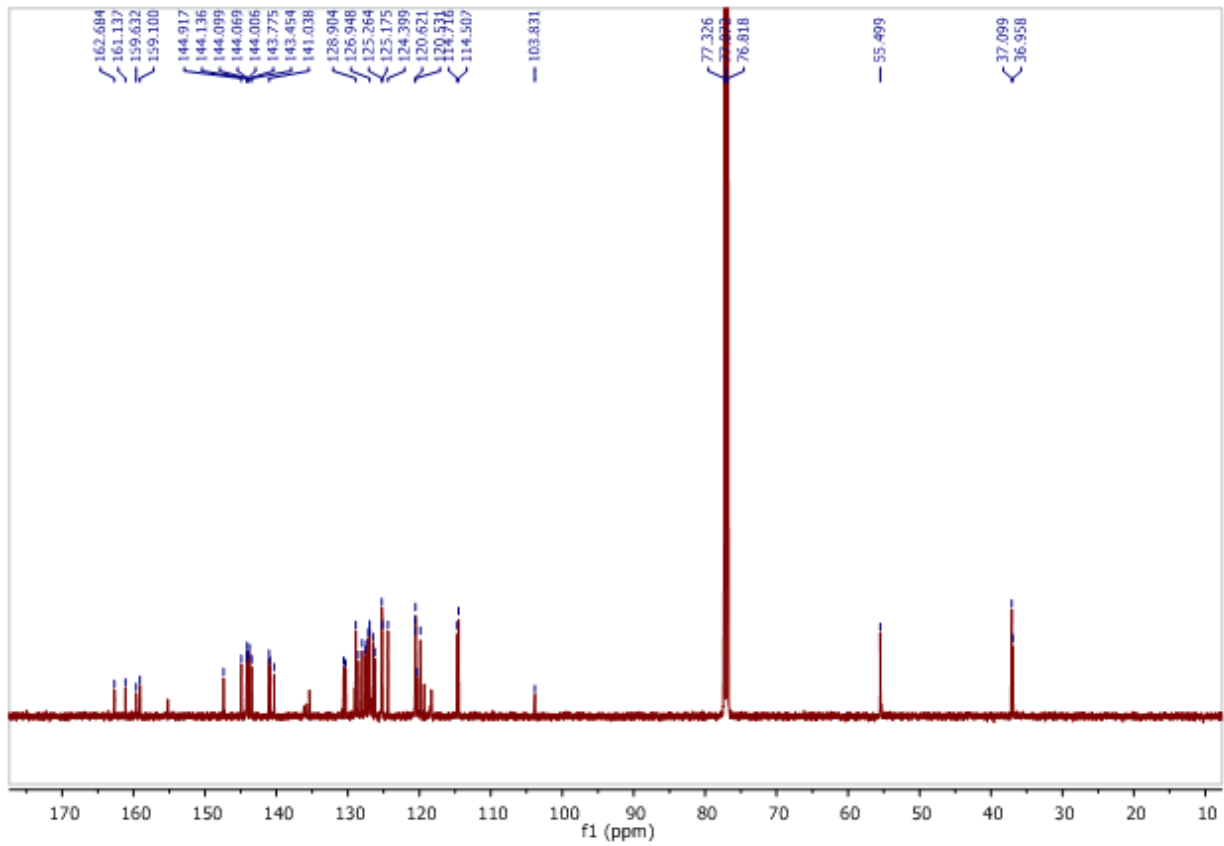

DEPT-135 NMR spectrum of 2,6-di(9H-fluoren-2-yl)-4-(4-methoxyphenyl)nicotinonitrile

(7c)

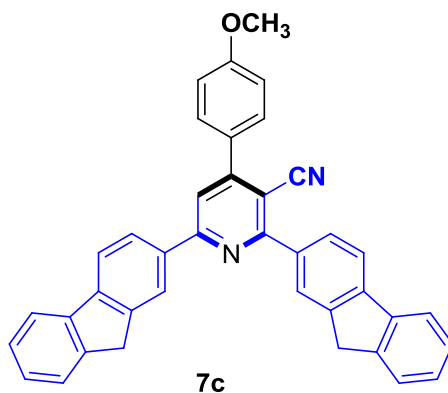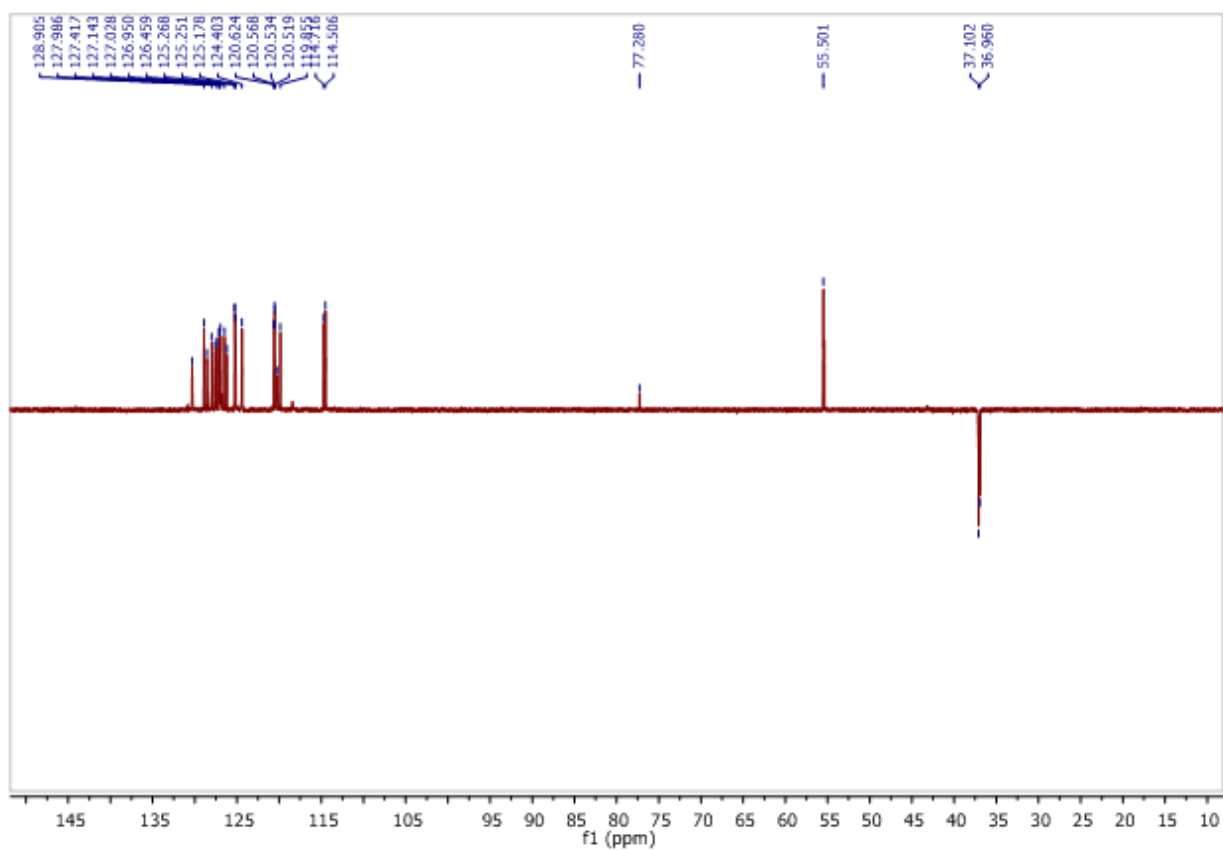

**<sup>1</sup>H NMR spectrum 4-(4-chlorophenyl)-2,6-di(9H-fluoren-2-yl)nicotinonitrile (7d)**

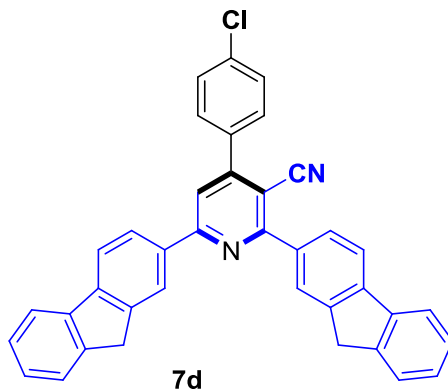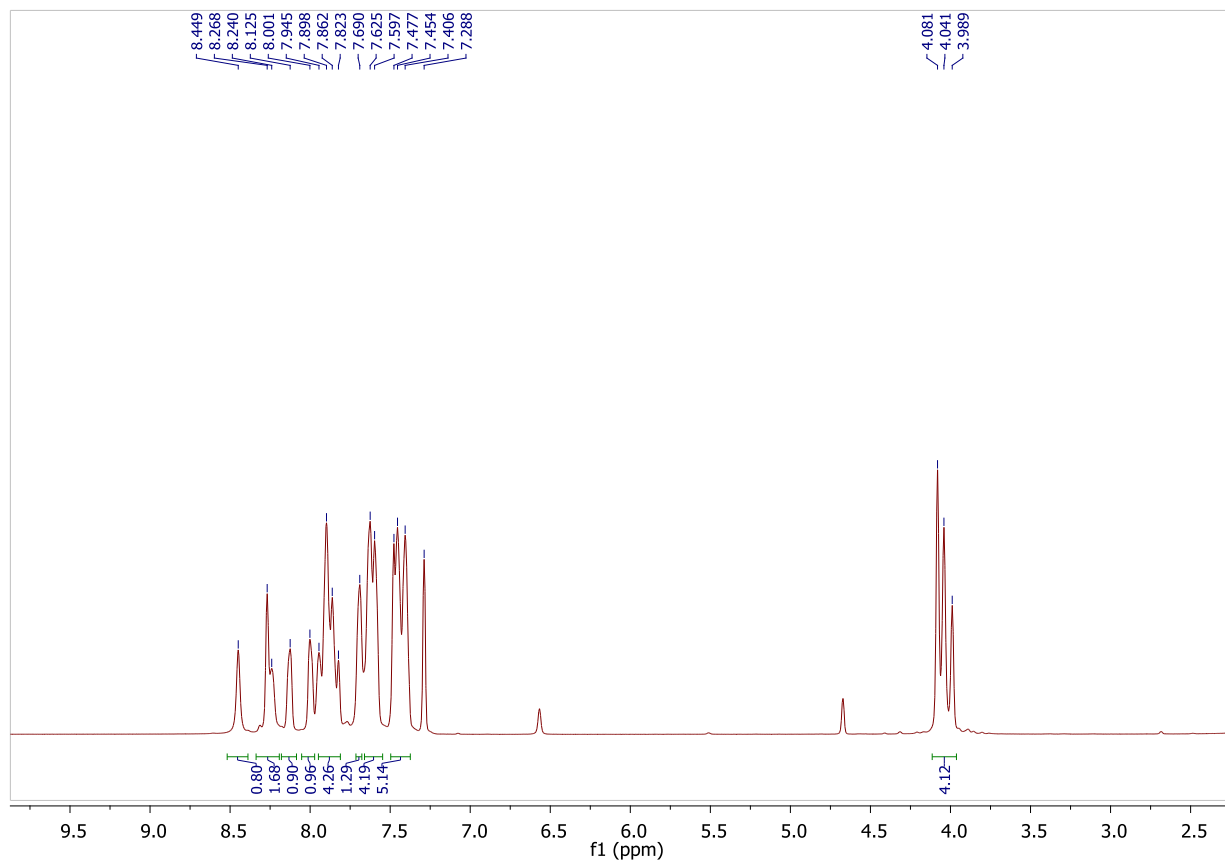

<sup>13</sup>C NMR spectrum 4-(4-chlorophenyl)-2,6-di(9H-fluoren-2-yl)nicotinonitrile (7d)

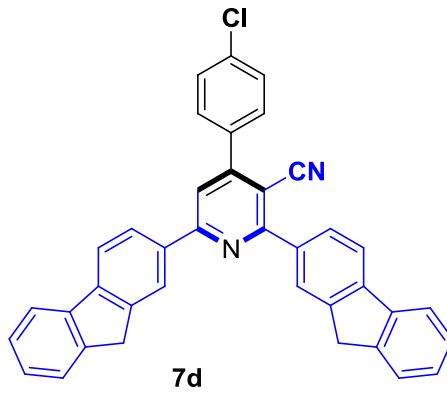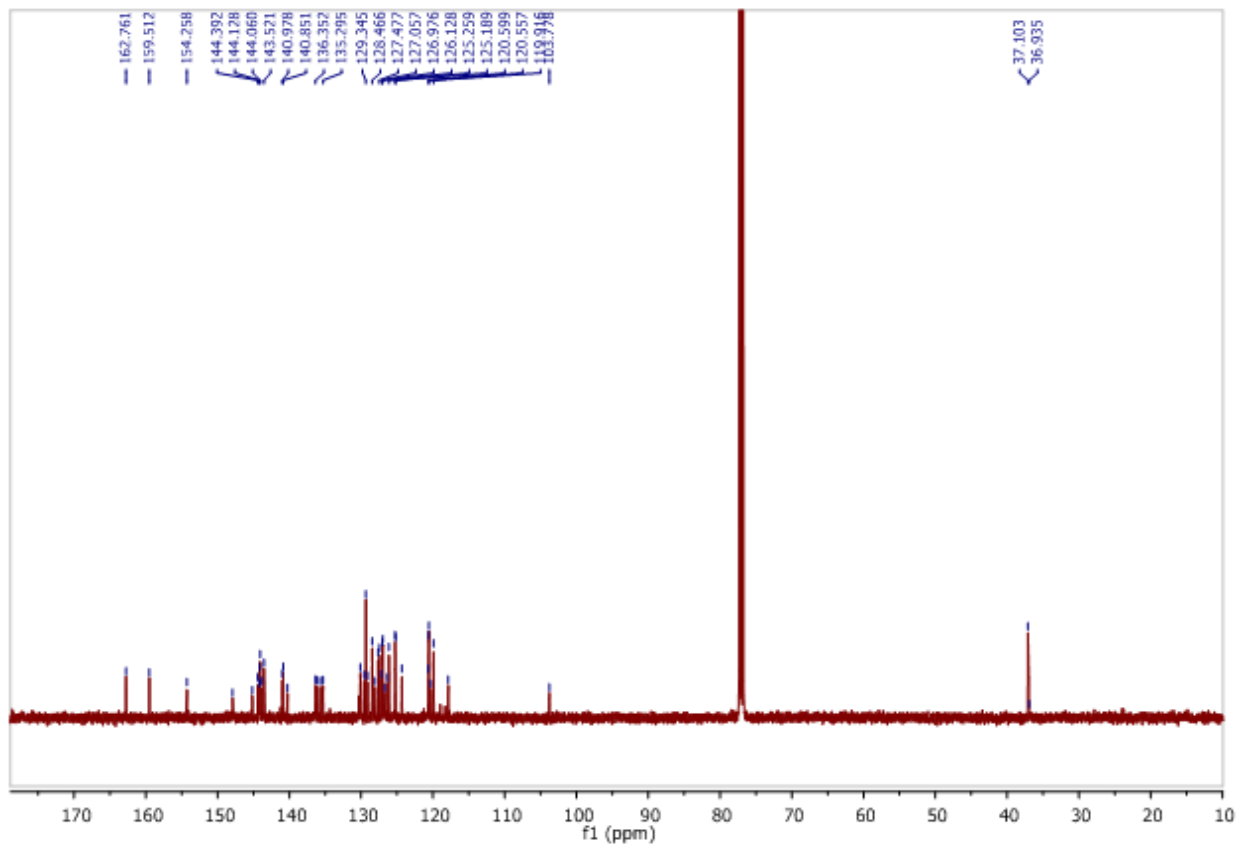

DEPT-135 NMR spectrum 4-(4-chlorophenyl)-2,6-di(9H-fluoren-2-yl)nicotinonitrile (7d)

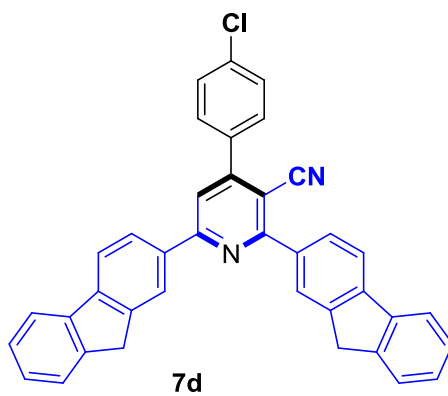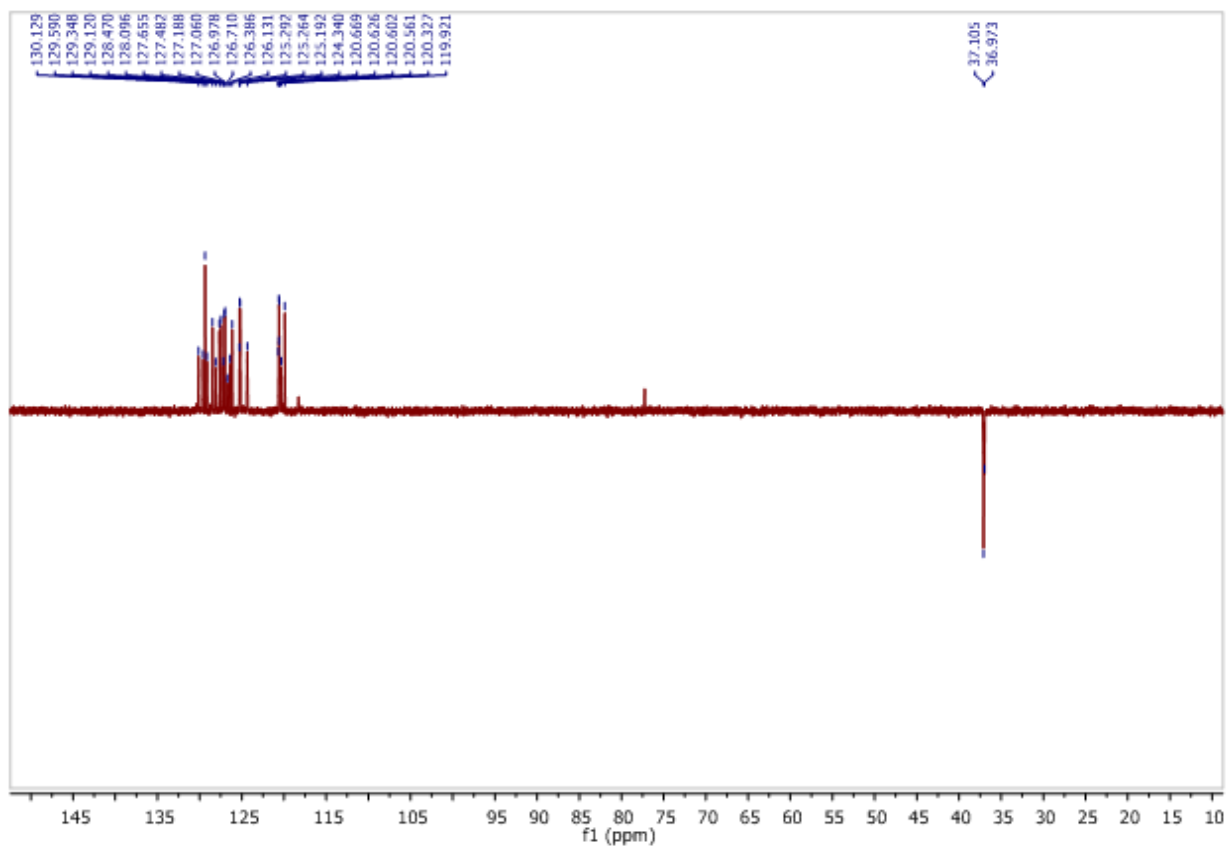



**<sup>1</sup>H NMR spectrum of 4-(4-cyanophenyl)-2,6-di(9H-fluoren-2-yl)nicotinonitrile (7e)**

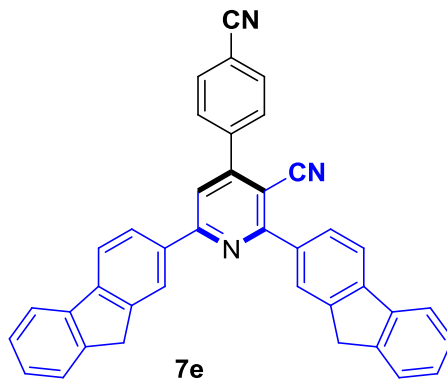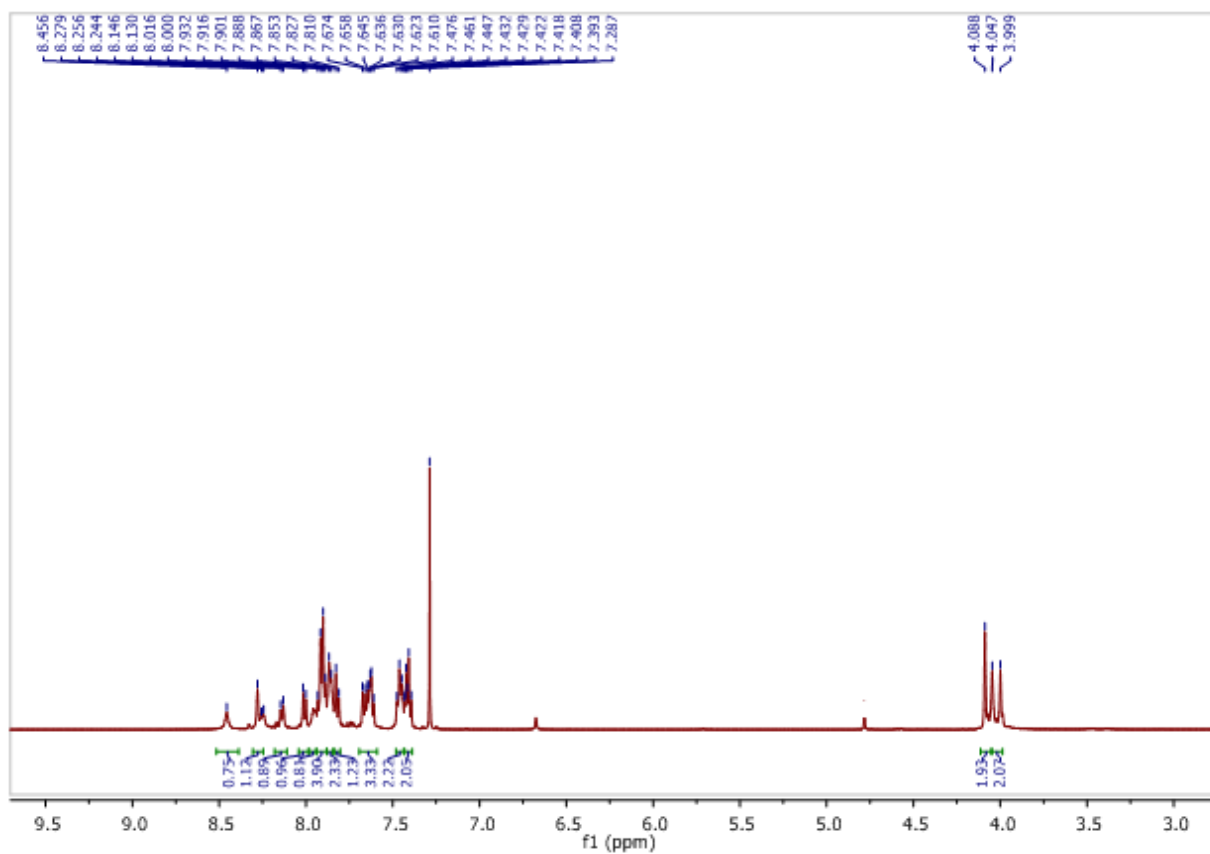

**<sup>13</sup>C NMR spectrum of 4-(4-cyanophenyl)-2,6-di(9H-fluoren-2-yl)nicotinonitrile (7e)**

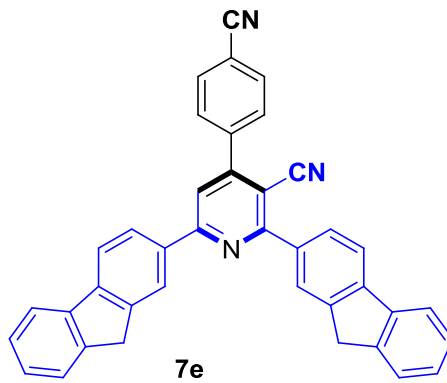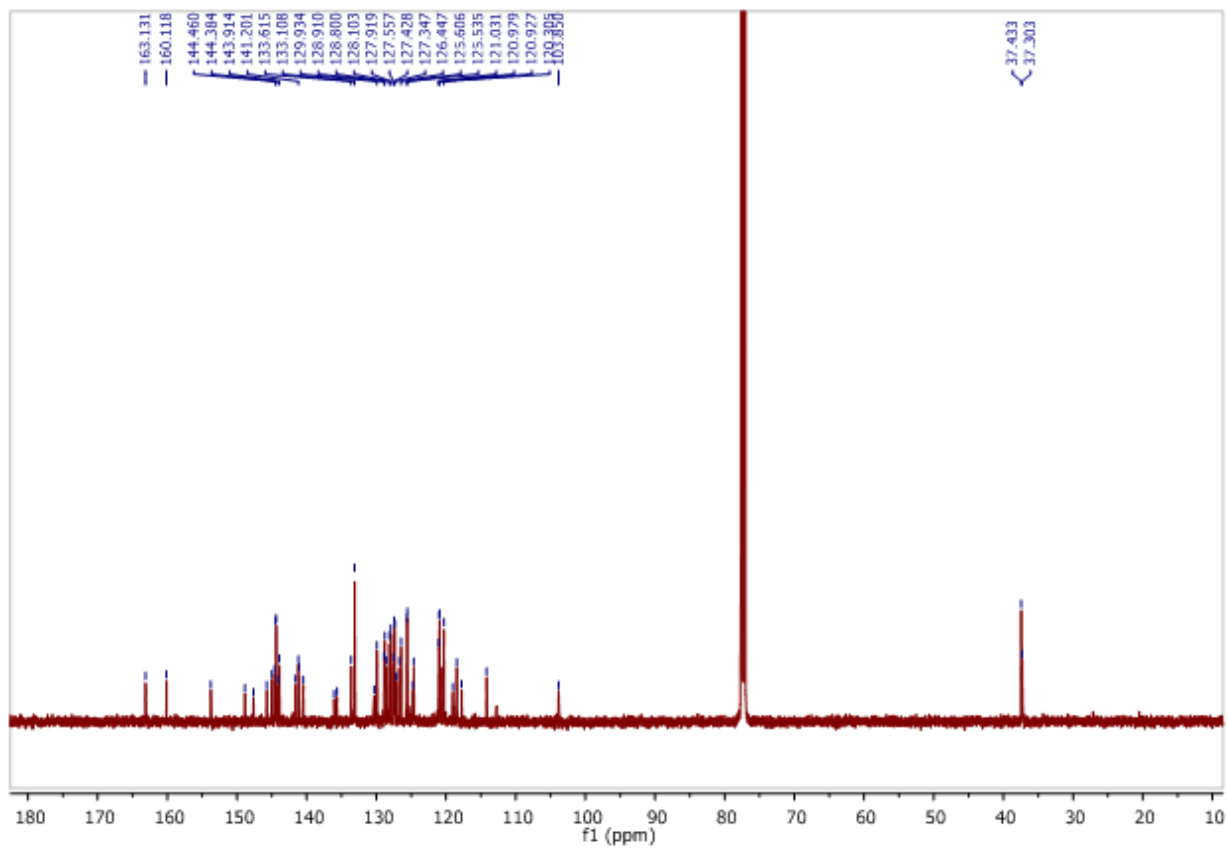

DEPT-135 NMR spectrum of 4-(4-cyanophenyl)-2,6-di(9H-fluoren-2-yl)nicotinonitrile (7e)

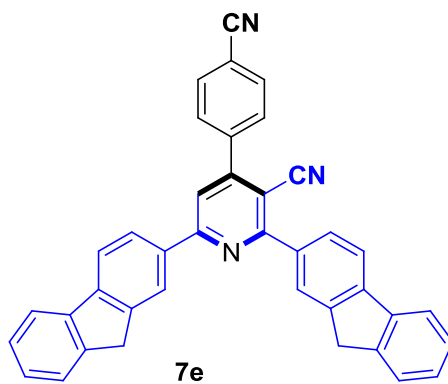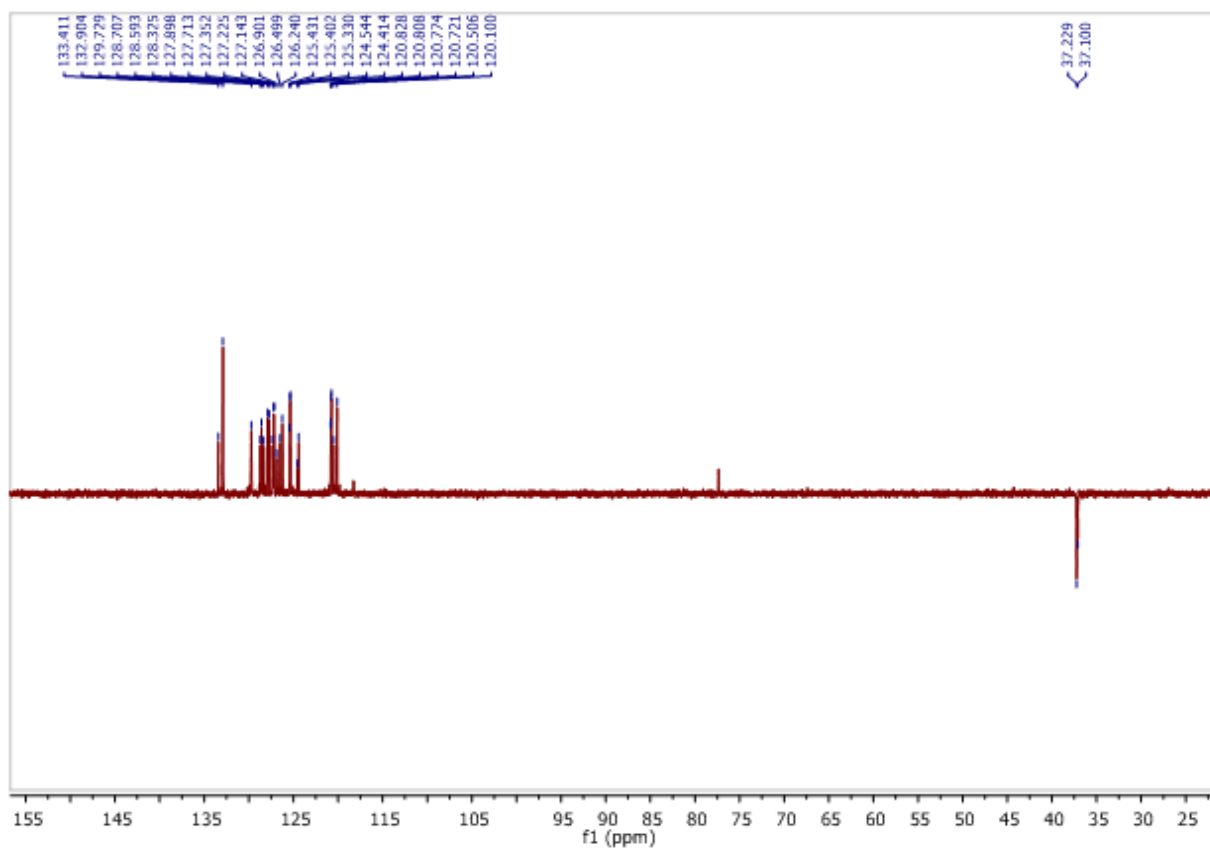

**<sup>1</sup>H NMR spectrum of 2,6-di(9H-fluoren-2-yl)-4-(4-nitrophenyl)nicotinonitrile (7f)**

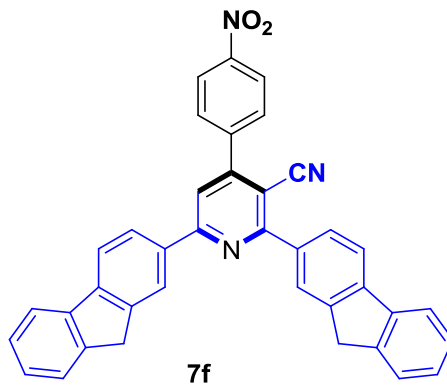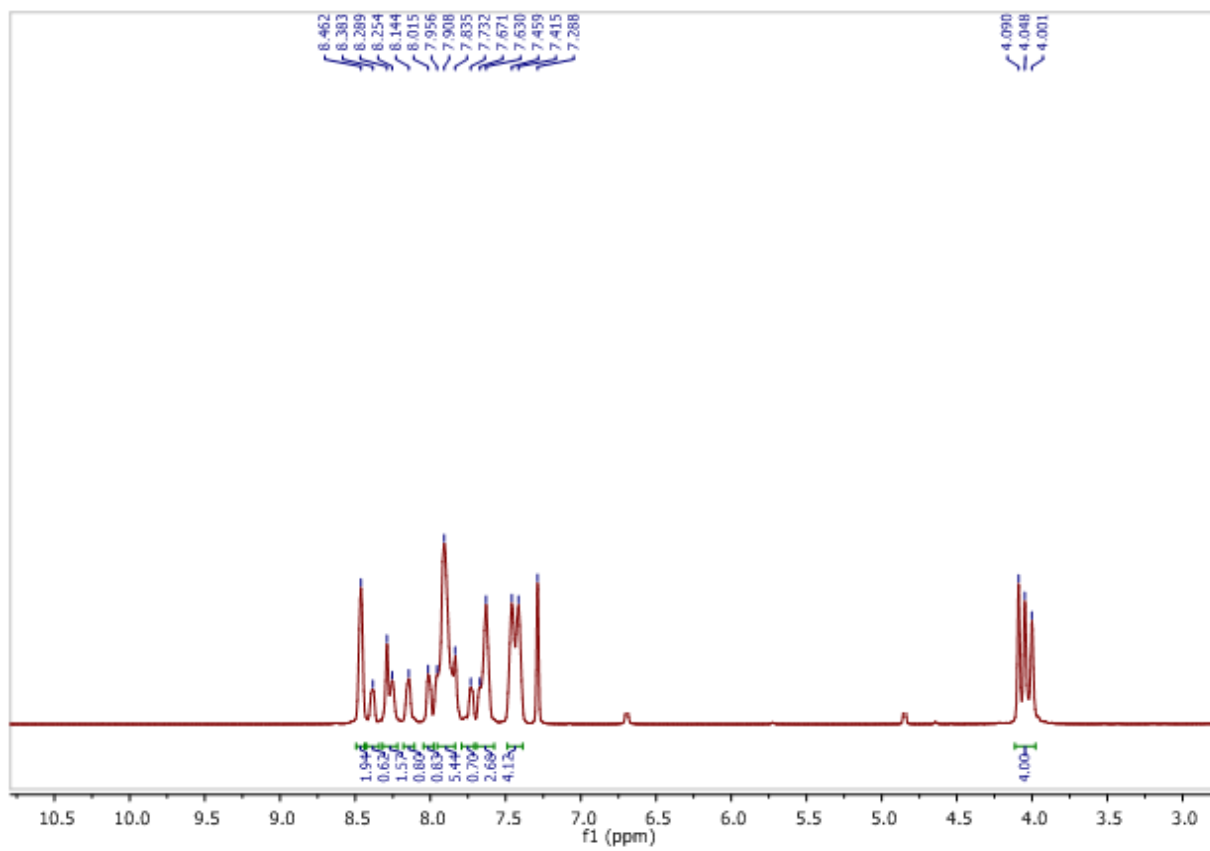

**<sup>13</sup>C NMR spectrum of 2,6-di(9H-fluoren-2-yl)-4-(4-nitrophenyl)nicotinonitrile (7f)**

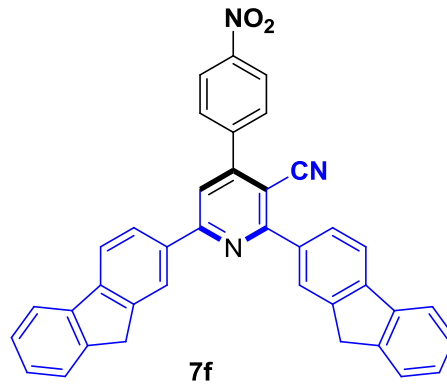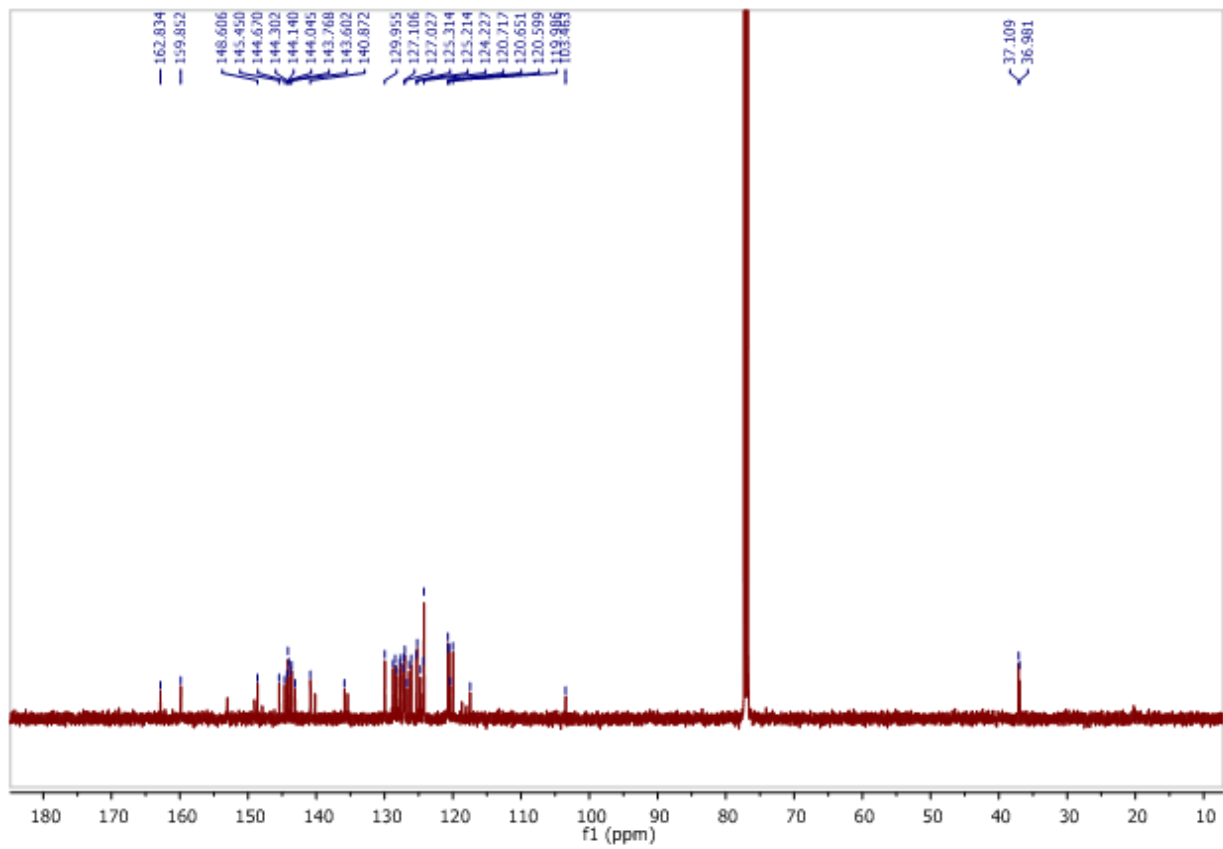

DEPT-135 NMR spectrum of 2,6-di(9H-fluoren-2-yl)-4-(4-nitrophenyl)nicotinonitrile (7f)

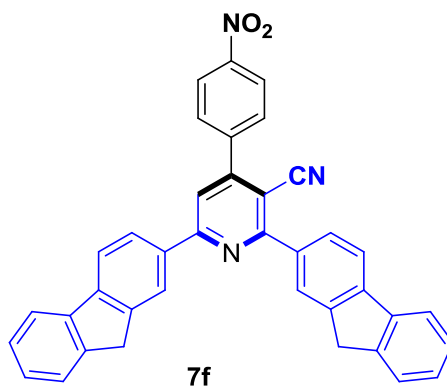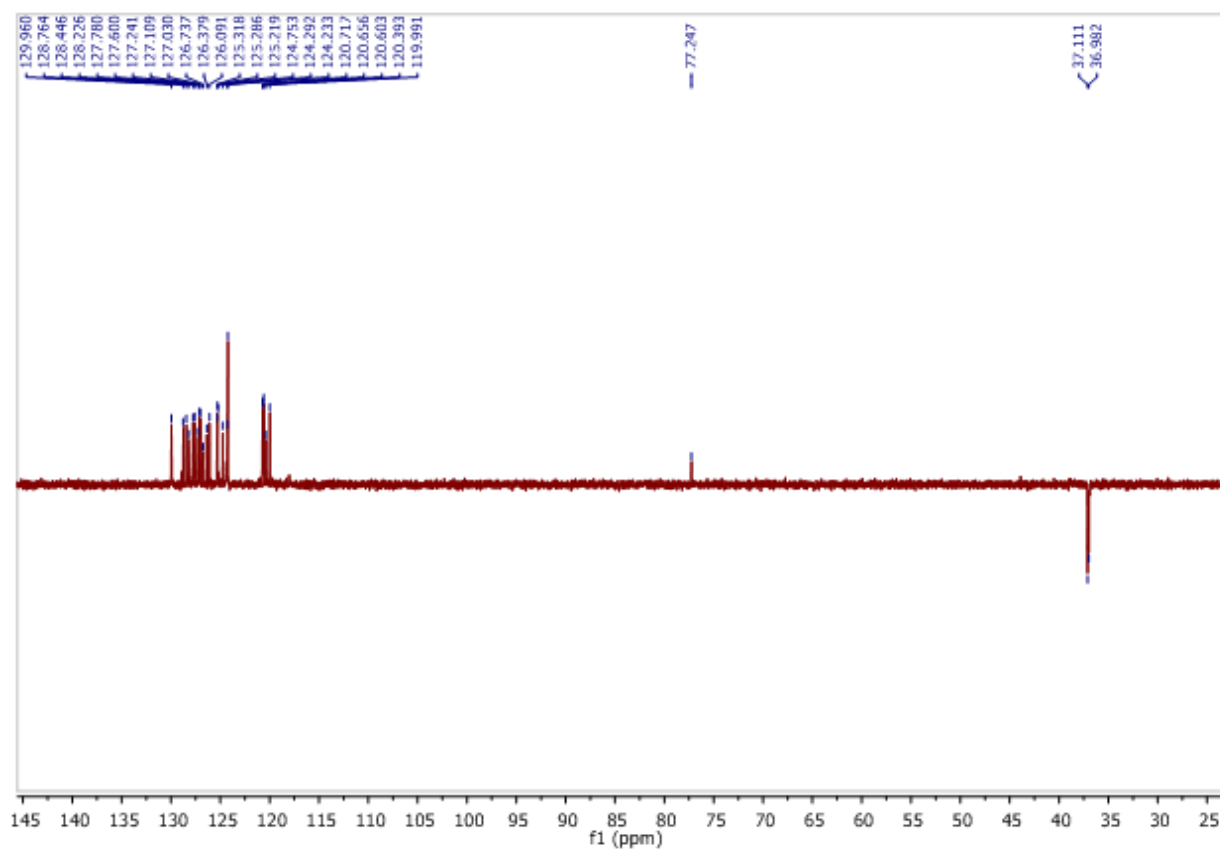

**<sup>1</sup>H NMR spectrum of 6-(9H-fluoren-2-yl)-4-phenyl-2-(pyren-1-yl)nicotinonitrile (8a)**

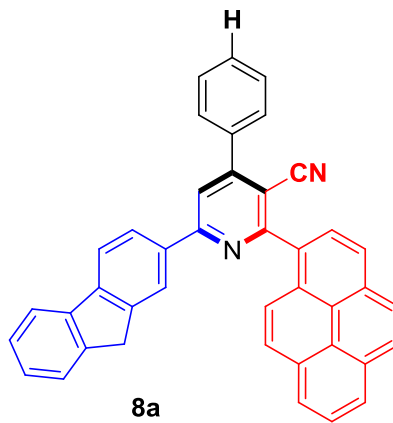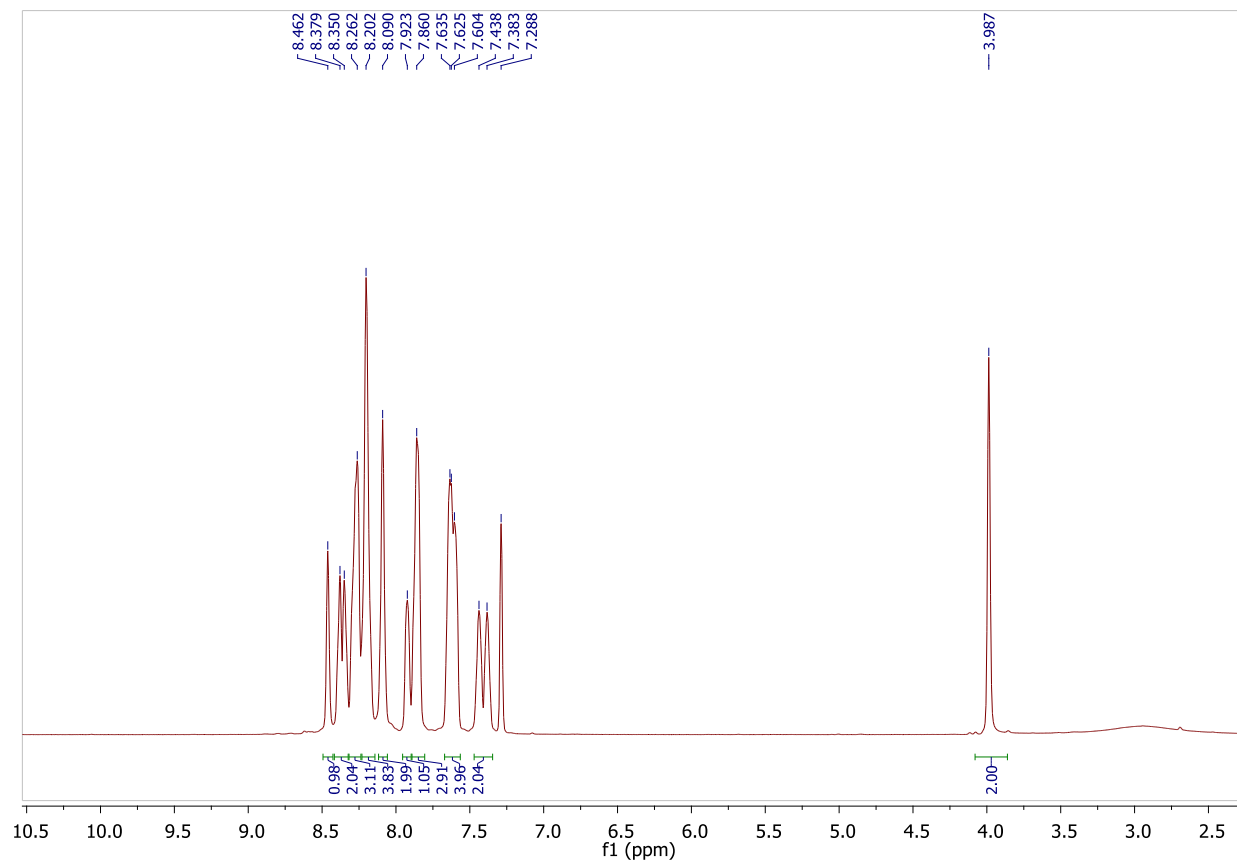

**<sup>13</sup>C NMR spectrum of 6-(9H-fluoren-2-yl)-4-phenyl-2-(pyren-1-yl)nicotinonitrile (8a)**

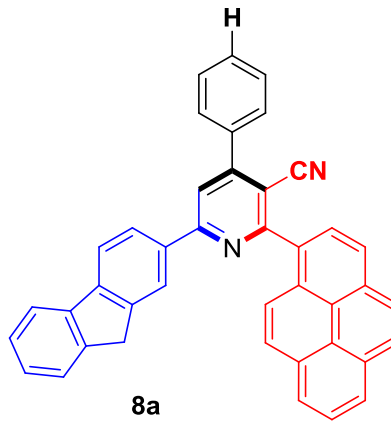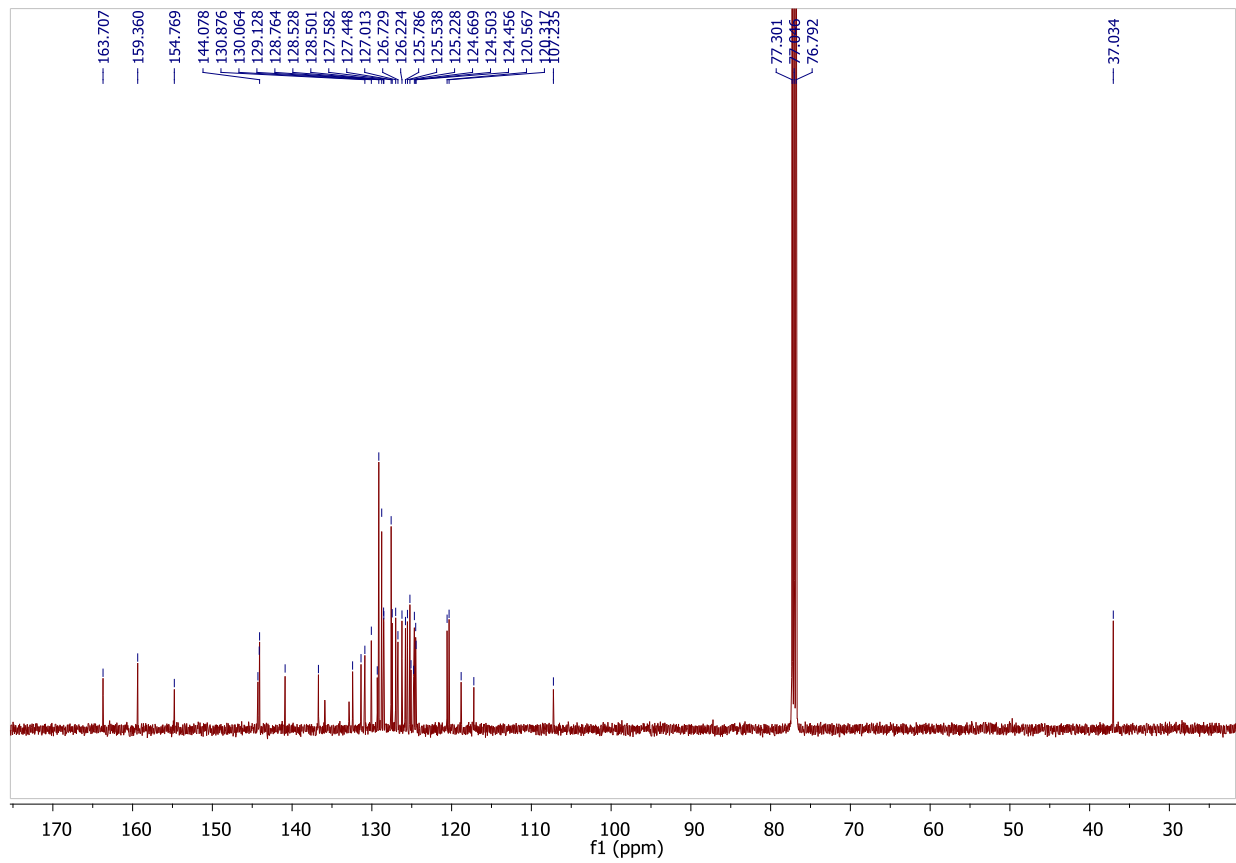



DEPT-135 NMR spectrum of 6-(9H-fluoren-2-yl)-4-phenyl-2-(pyren-1-yl)nicotinonitrile (8a)

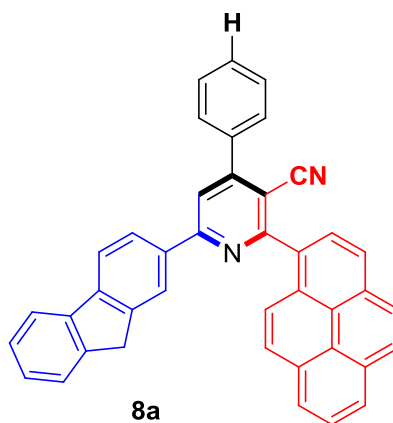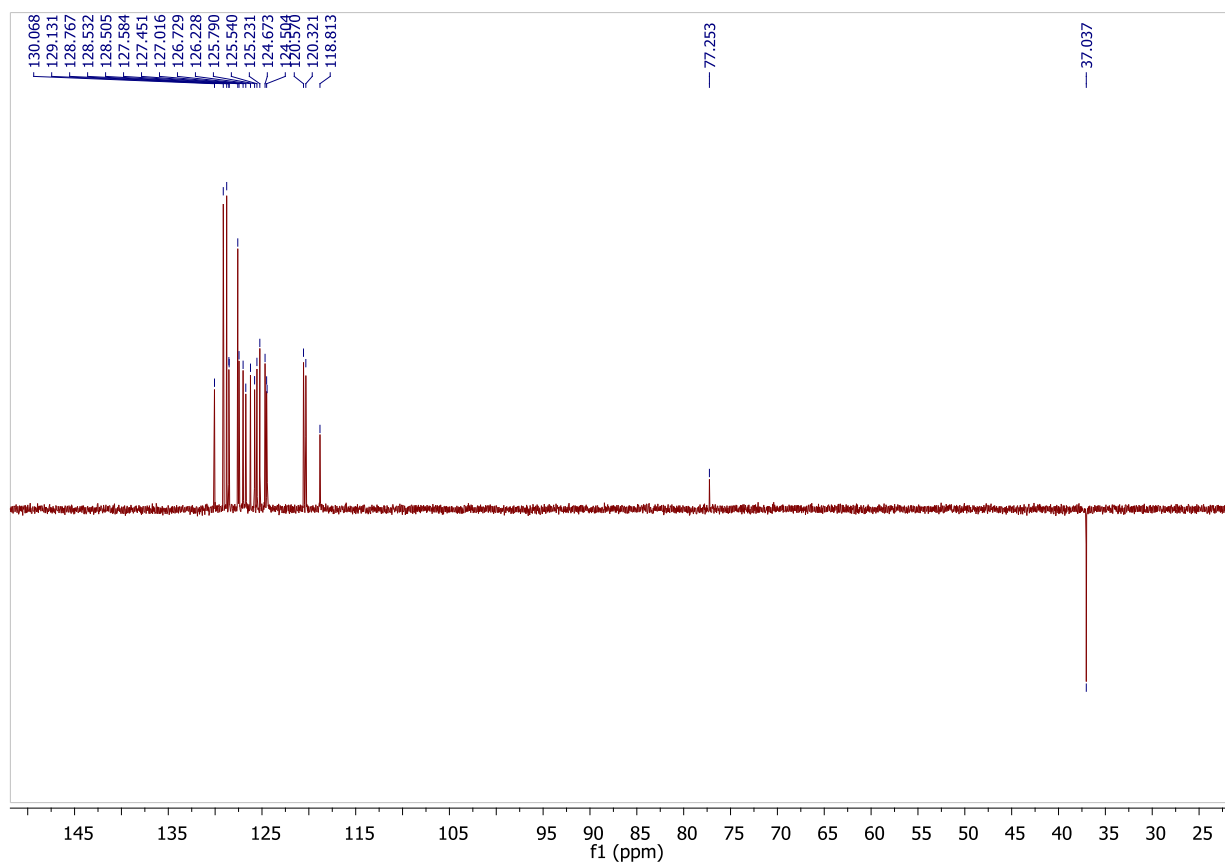

**<sup>1</sup>H NMR spectrum of 4-(4-(dimethylamino)phenyl)-6-(9H-fluoren-2-yl)-2-(pyren-1-yl)nicotinonitrile (8b)**

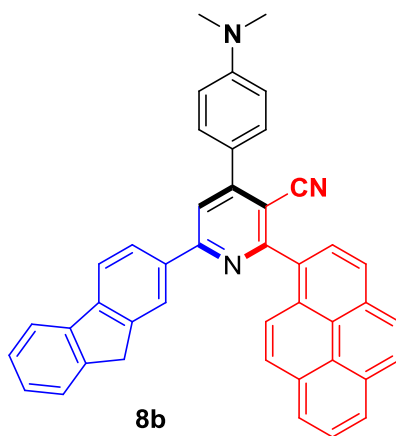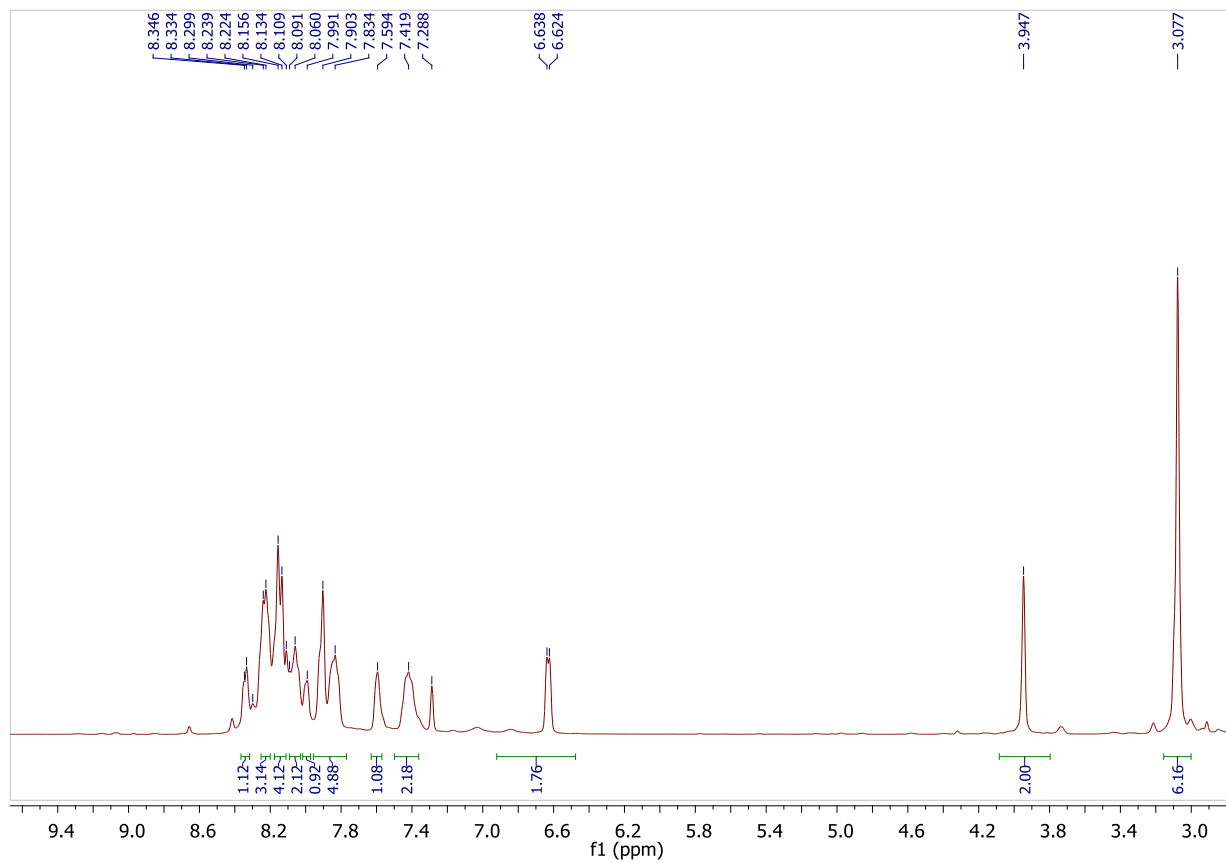

**<sup>13</sup>C NMR spectrum of 4-(4-(dimethylamino)phenyl)-6-(9H-fluoren-2-yl)-2-(pyren-1-yl)nicotinonitrile (8b)**

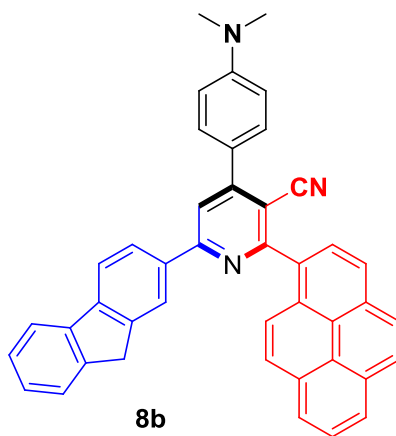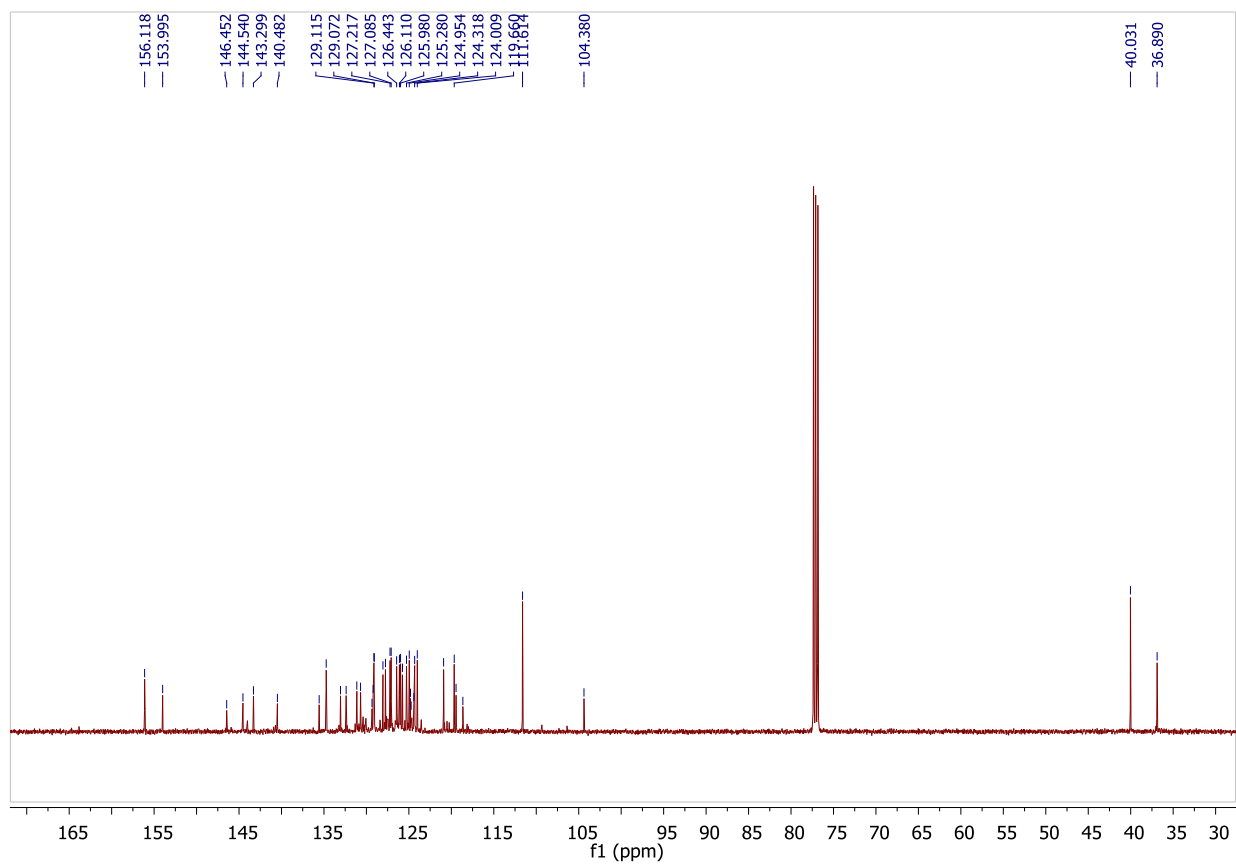

**DEPT-135 spectrum of 4-(4-(dimethylamino)phenyl)-6-(9H-fluoren-2-yl)-2-(pyren-1-yl)nicotinonitrile (8b)**

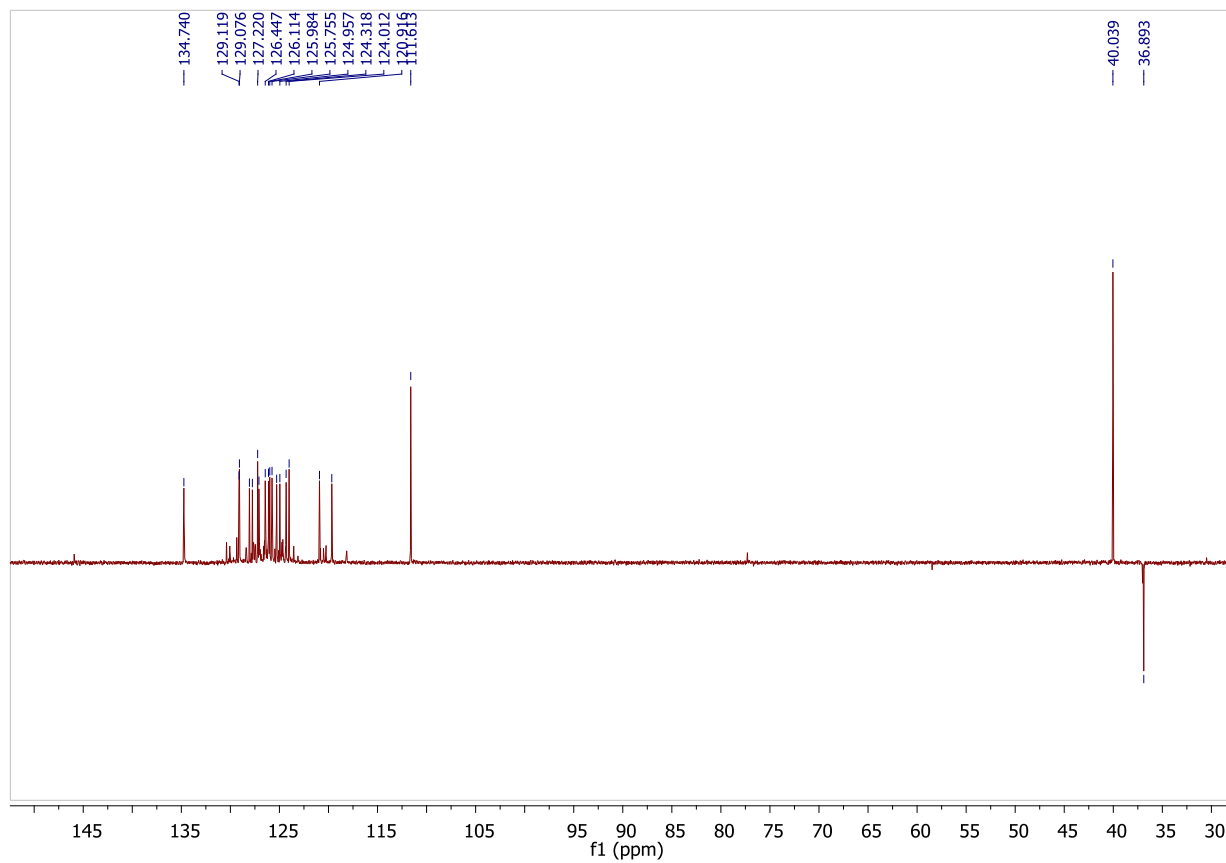

**<sup>1</sup>H NMR spectrum of 6-(9H-fluoren-2-yl)-4-(4-methoxyphenyl)-2-(pyren-1-yl)nicotinonitrile**

**(8c)**

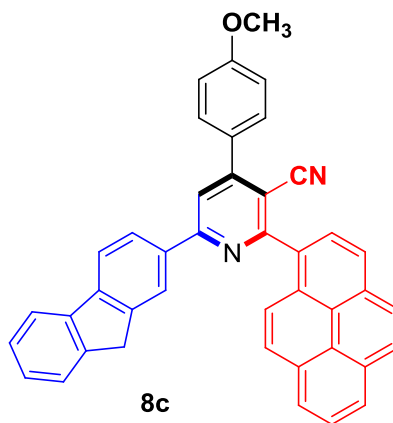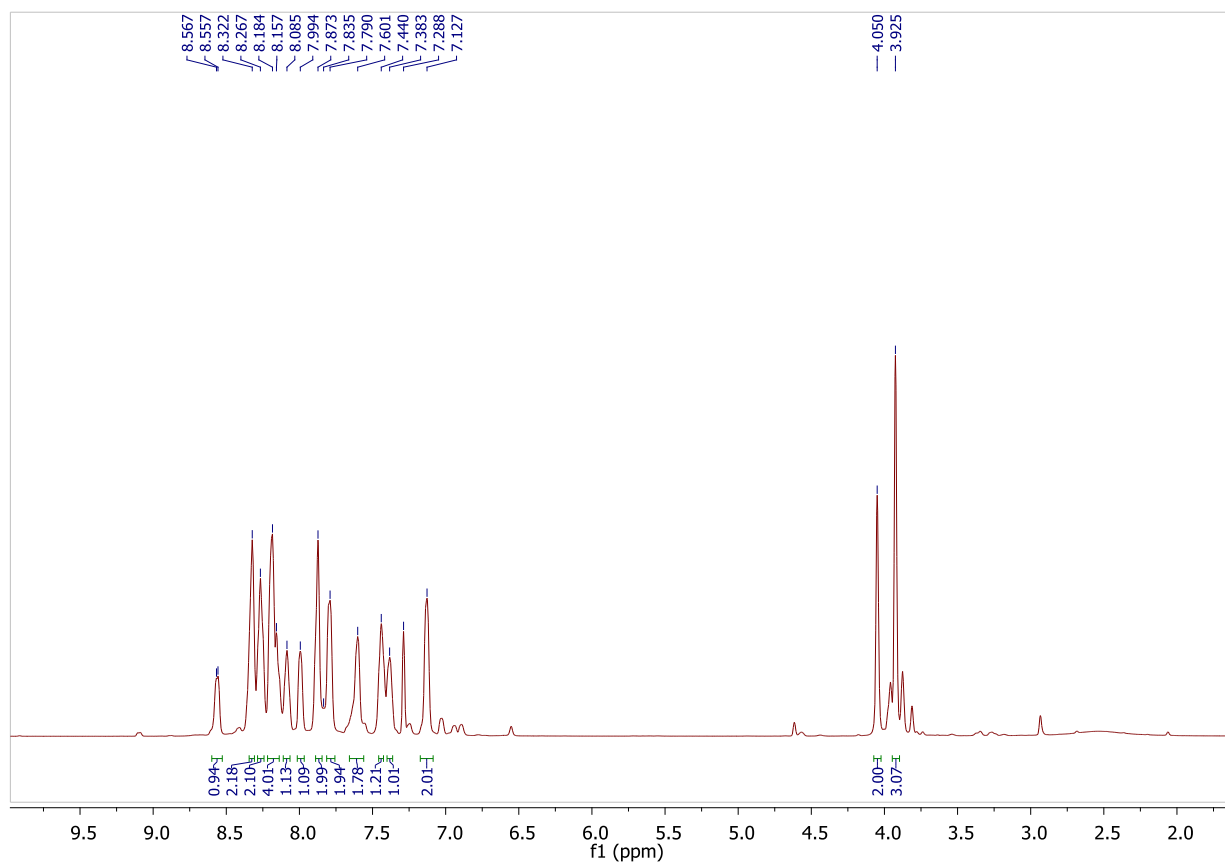

<sup>13</sup>C NMR spectrum of 6-(9H-fluoren-2-yl)-4-(4-methoxyphenyl)-2-(pyren-1-yl)nicotinonitrile (8c)

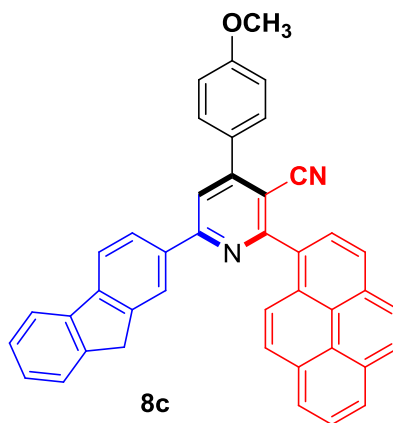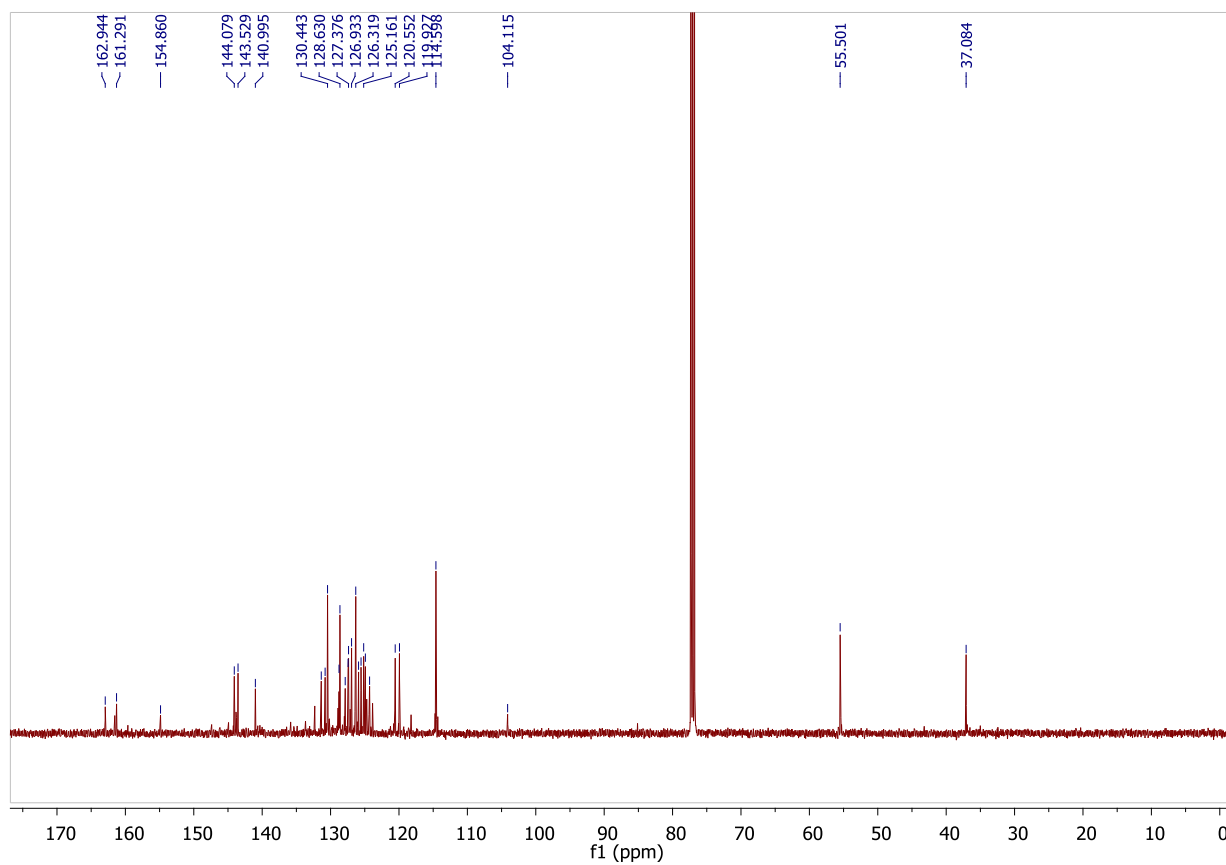

DEPT-135 NMR spectrum of 6-(9H-fluoren-2-yl)-4-(4-methoxyphenyl)-2-(pyren-1-yl)nicotinonitrile (8c)

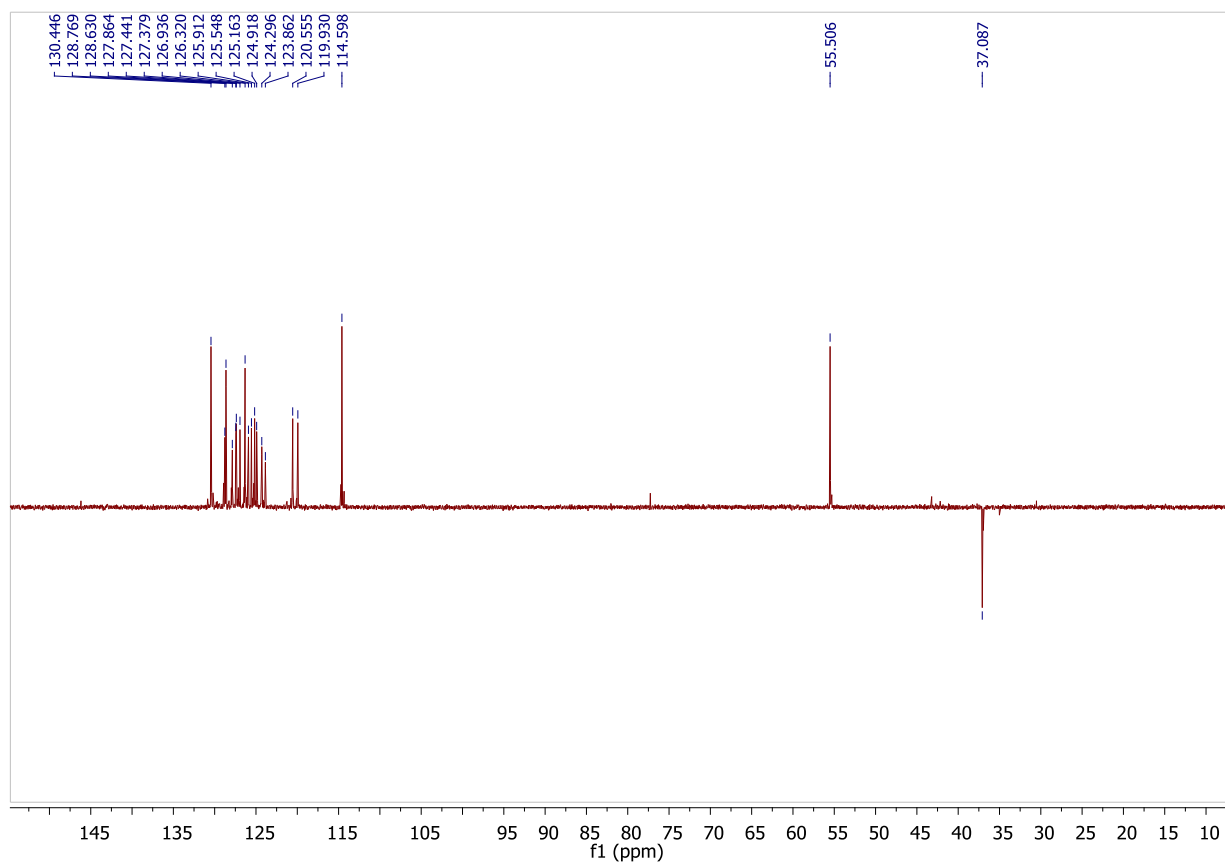

**<sup>1</sup>H NMR spectrum of 4-(4-chlorophenyl)-6-(9H-fluoren-2-yl)-2-(pyren-1-yl)nicotinonitrile**

**(8d)**

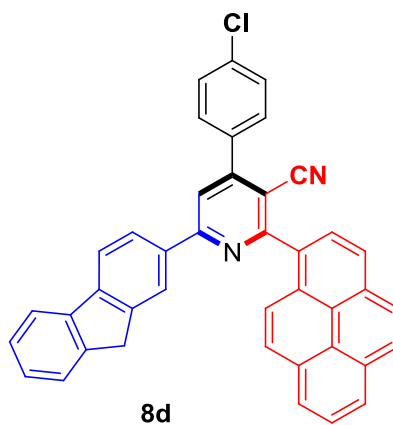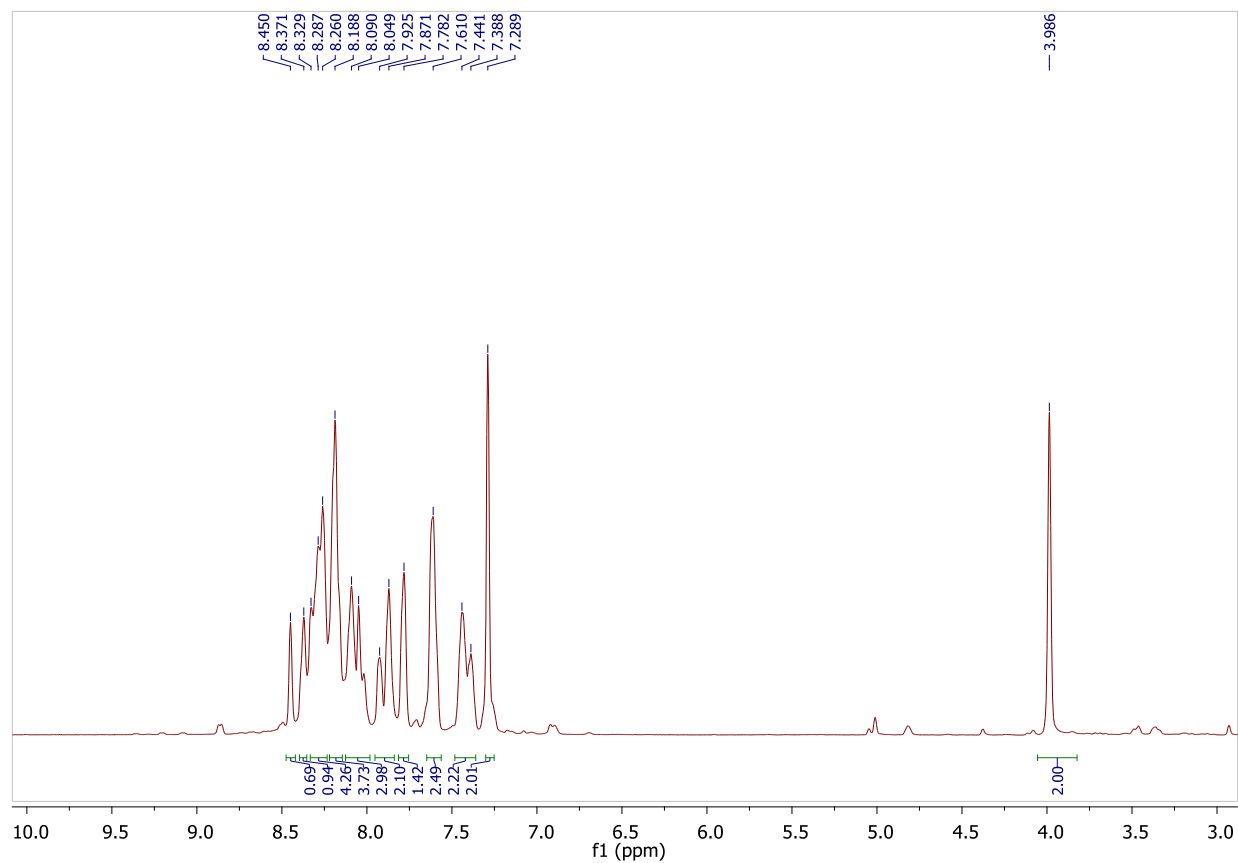



**$^{13}\text{C}$ -NMR spectrum of 4-(4-chlorophenyl)-6-(9H-fluoren-2-yl)-2-(pyren-1-yl)nicotinonitrile**

**(8d)**

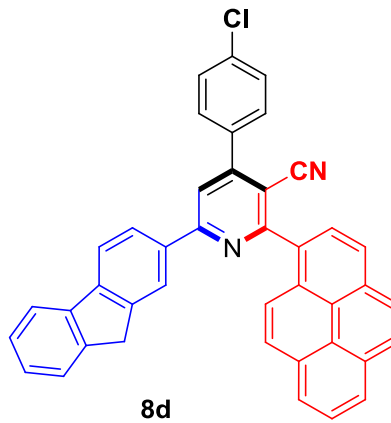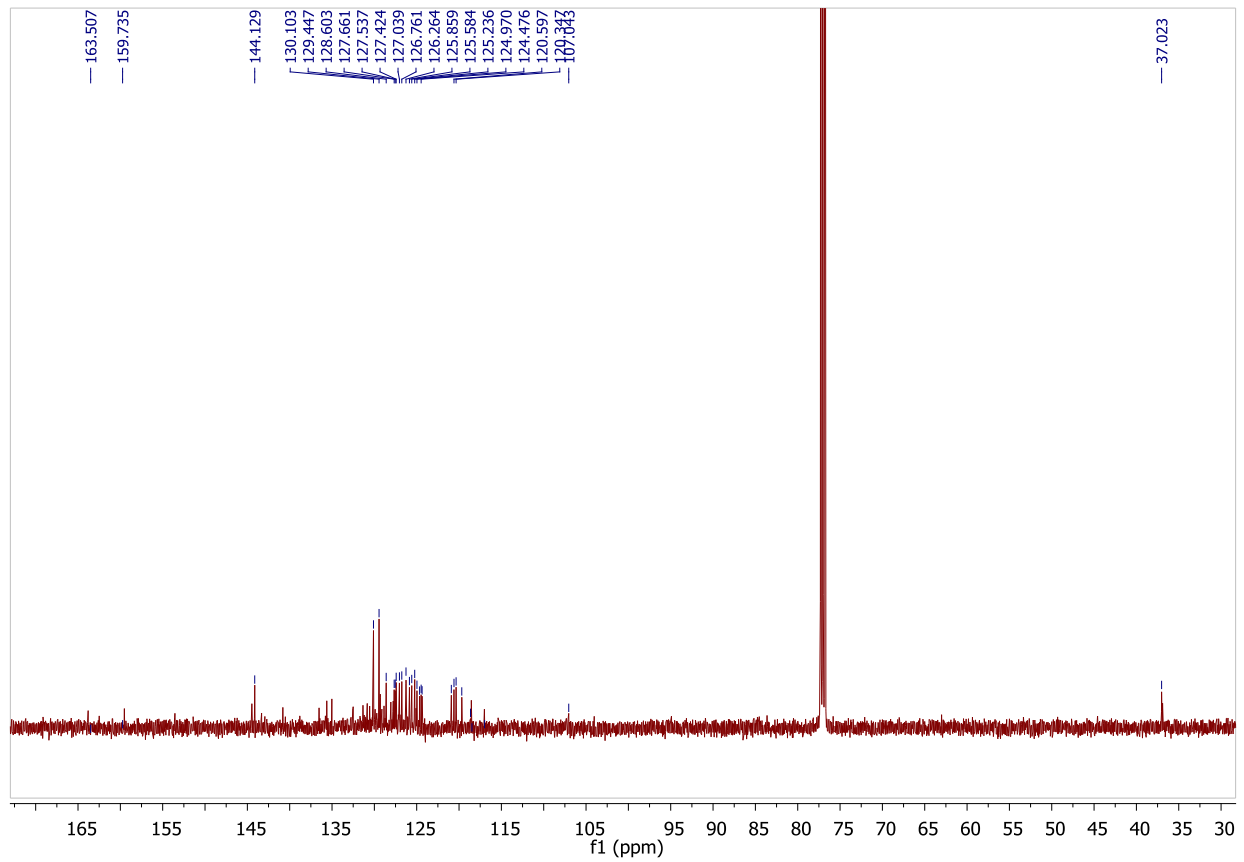

DEPT-135 NMR spectrum of 4-(4-chlorophenyl)-6-(9H-fluoren-2-yl)-2-(pyren-1-yl)nicotinonitrile (8d)

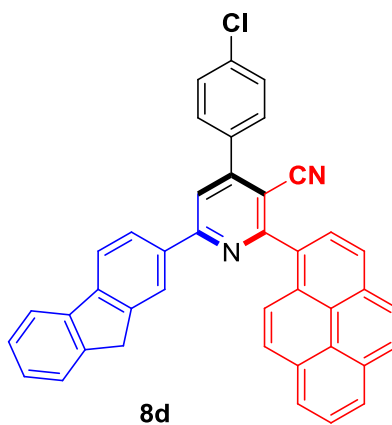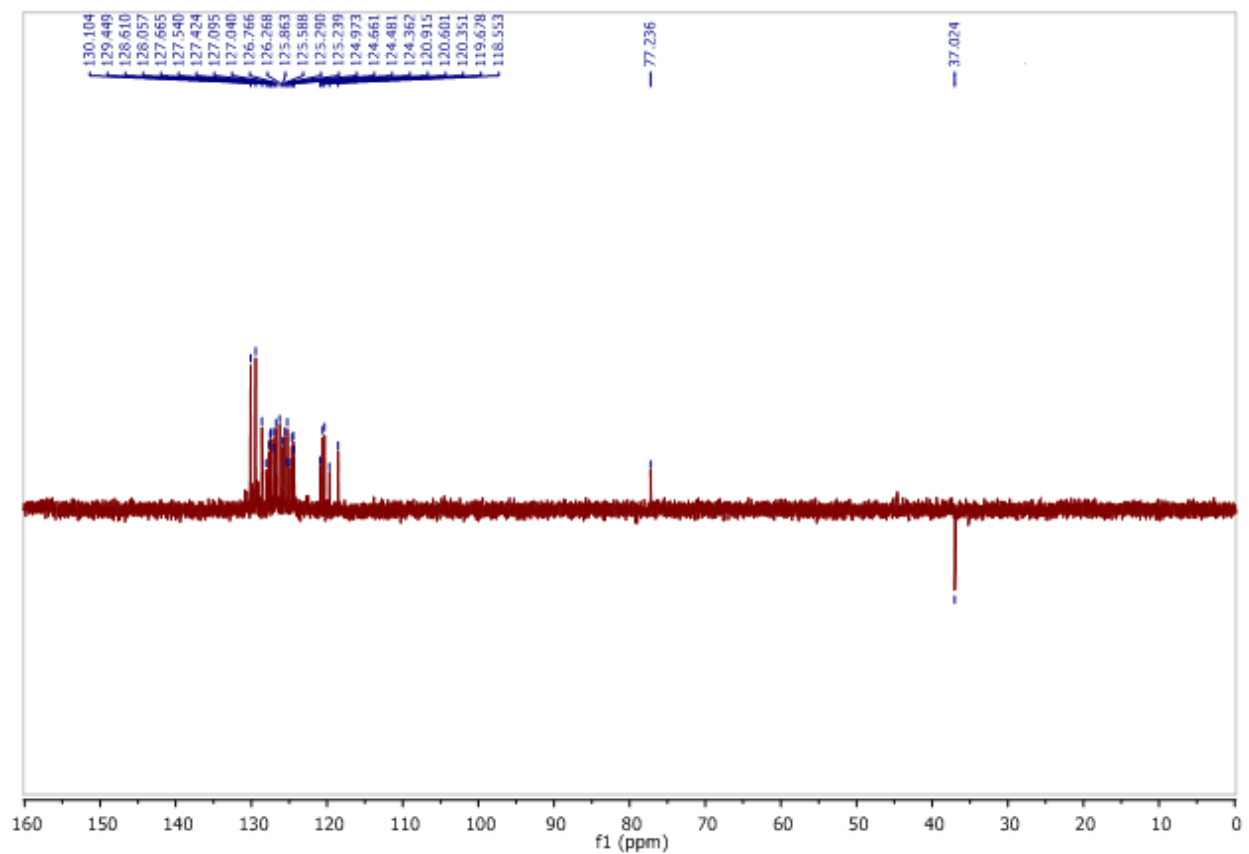

**<sup>1</sup>H NMR spectrum of 4-(4-cyanophenyl)-6-(9H-fluoren-2-yl)-2-(pyren-1-yl)nicotinonitrile**

**(8e)**

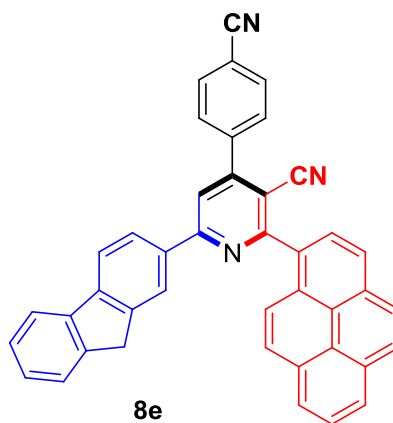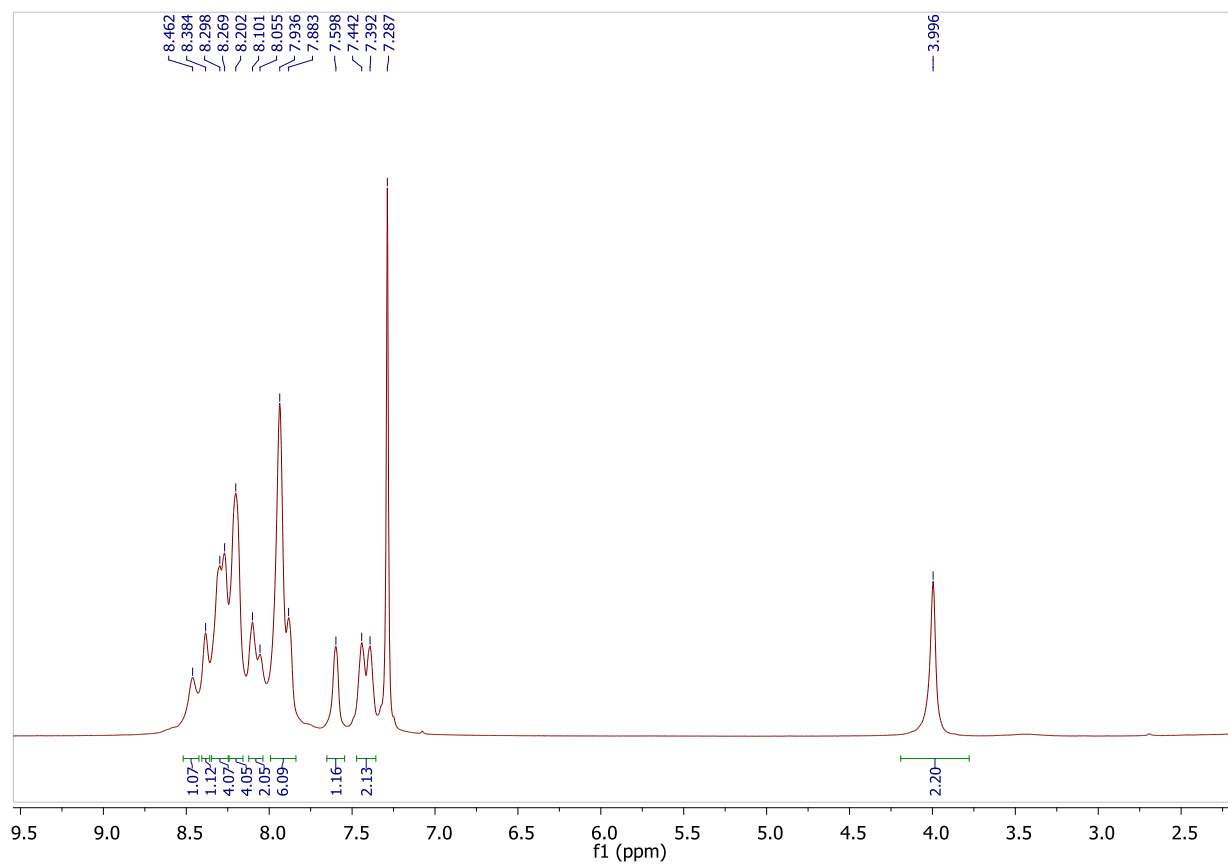

**<sup>13</sup>C NMR spectrum of 4-(4-cyanophenyl)-6-(9H-fluoren-2-yl)-2-(pyren-1-yl)nicotinonitrile**

**(8e)**

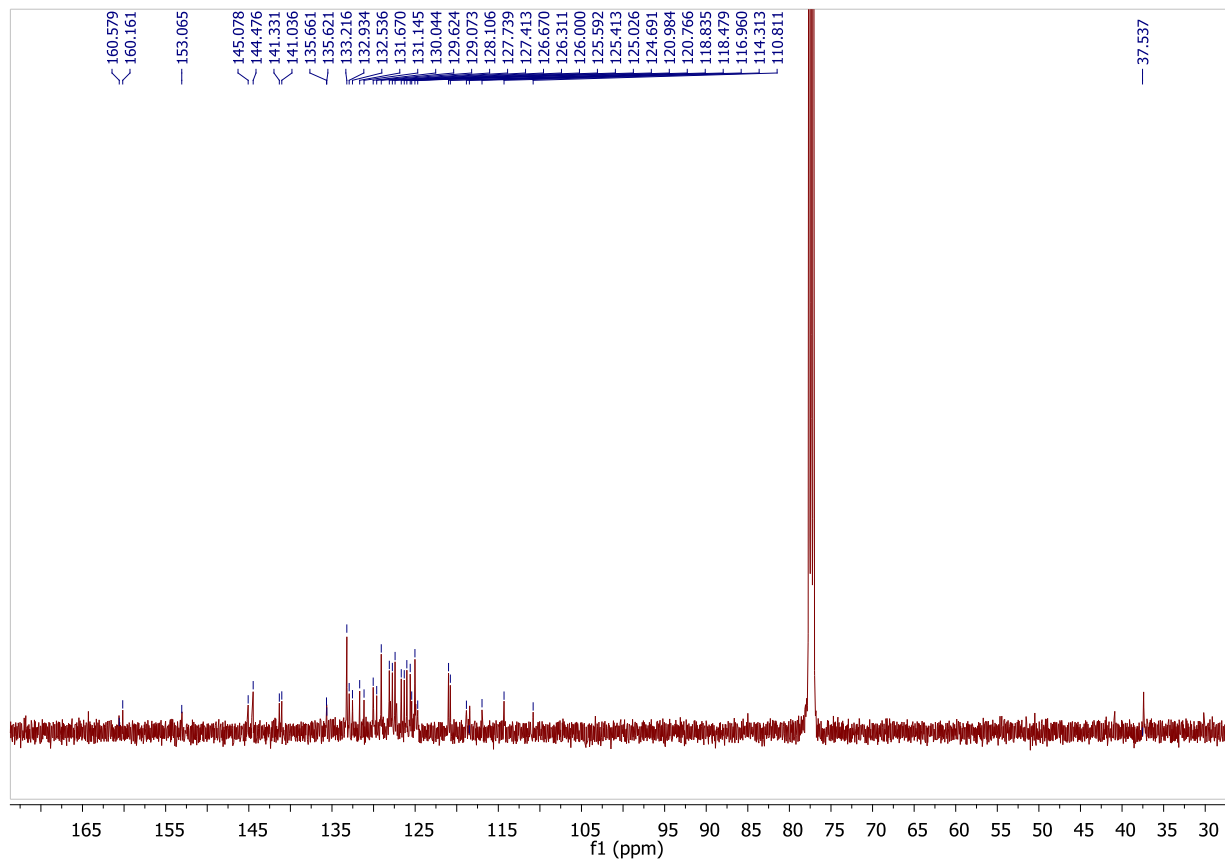

DEPT 135 NMR spectrum of 4-(4-cyanophenyl)-6-(9H-fluoren-2-yl)-2-(pyren-1-yl)nicotinonitrile (8e)

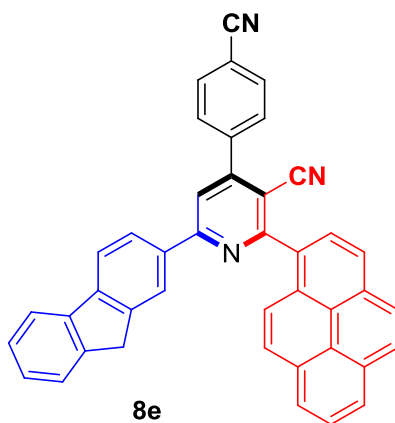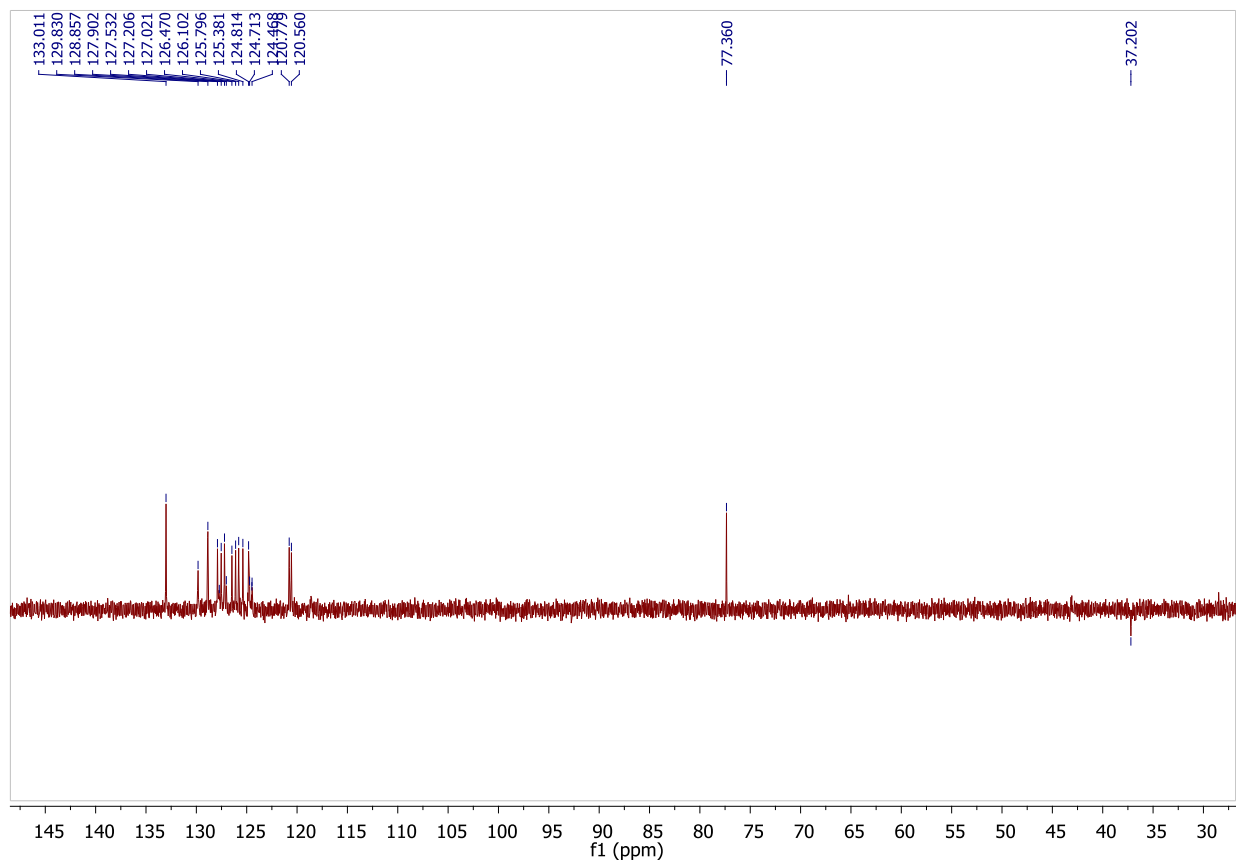

**<sup>1</sup>H NMR spectrum of 6-(9H-fluoren-2-yl)-4-(4-nitrophenyl)-2-(pyren-1-yl)nicotinonitrile (8f)**

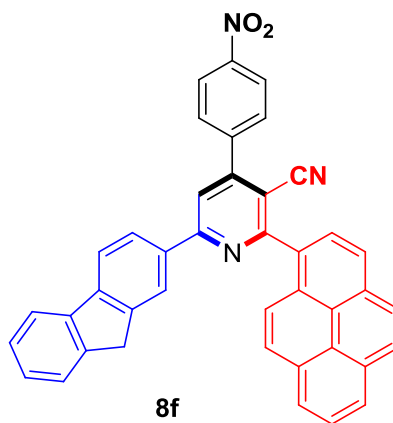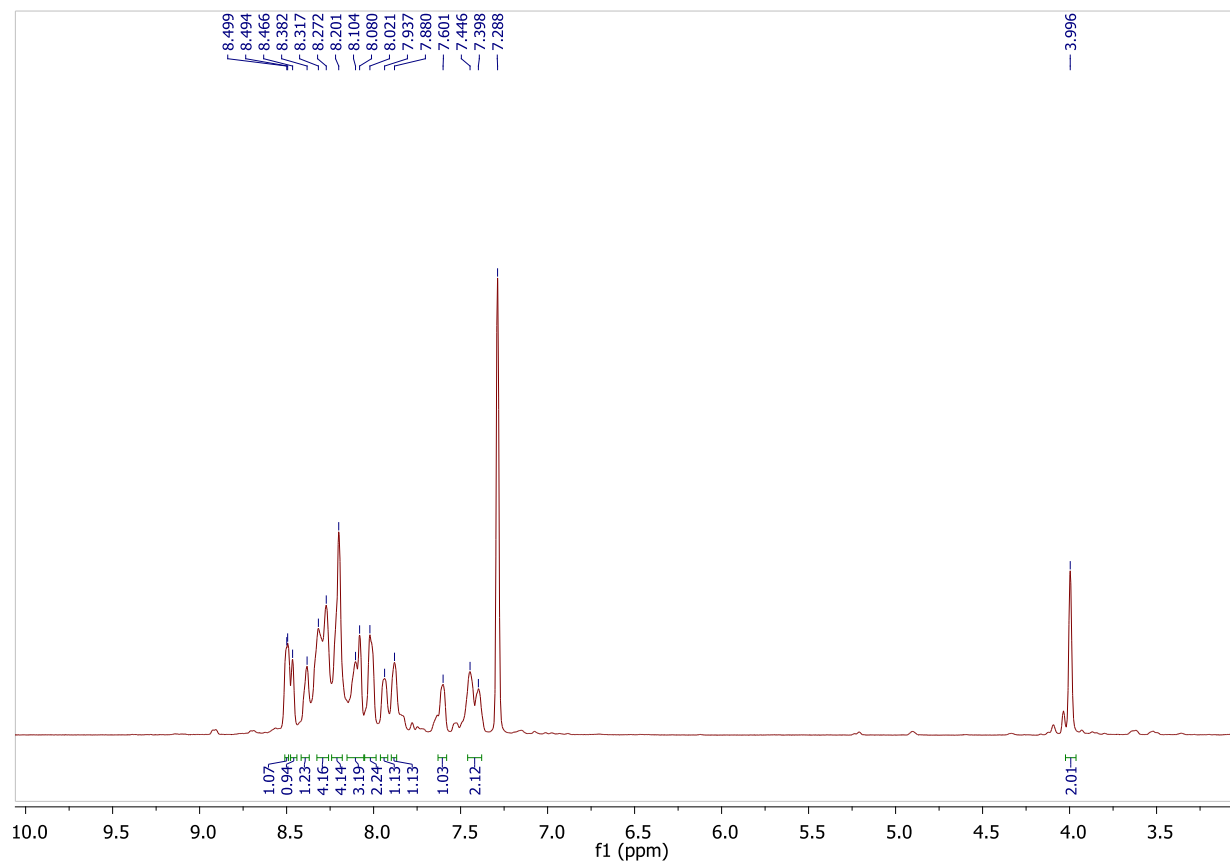

**<sup>13</sup>C NMR spectrum of 6-(9H-fluoren-2-yl)-4-(4-nitrophenyl)-2-(pyren-1-yl)nicotinonitrile**

**(8f)**

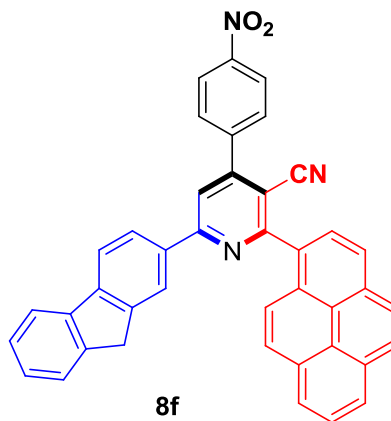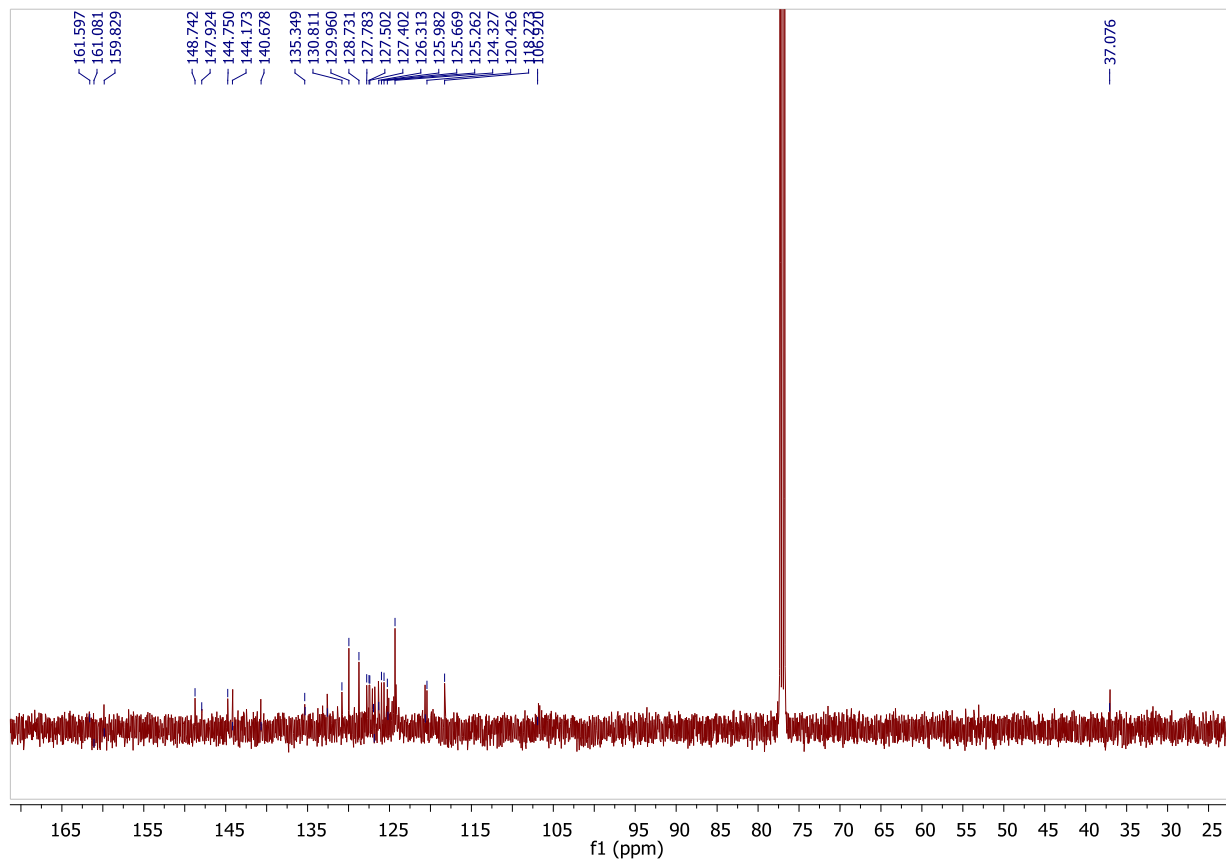

DEPT-135 NMR spectrum of 6-(9H-fluoren-2-yl)-4-(4-nitrophenyl)-2-(pyren-1-yl)nicotinonitrile (8f)

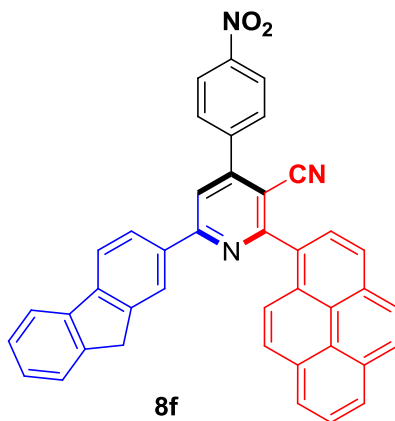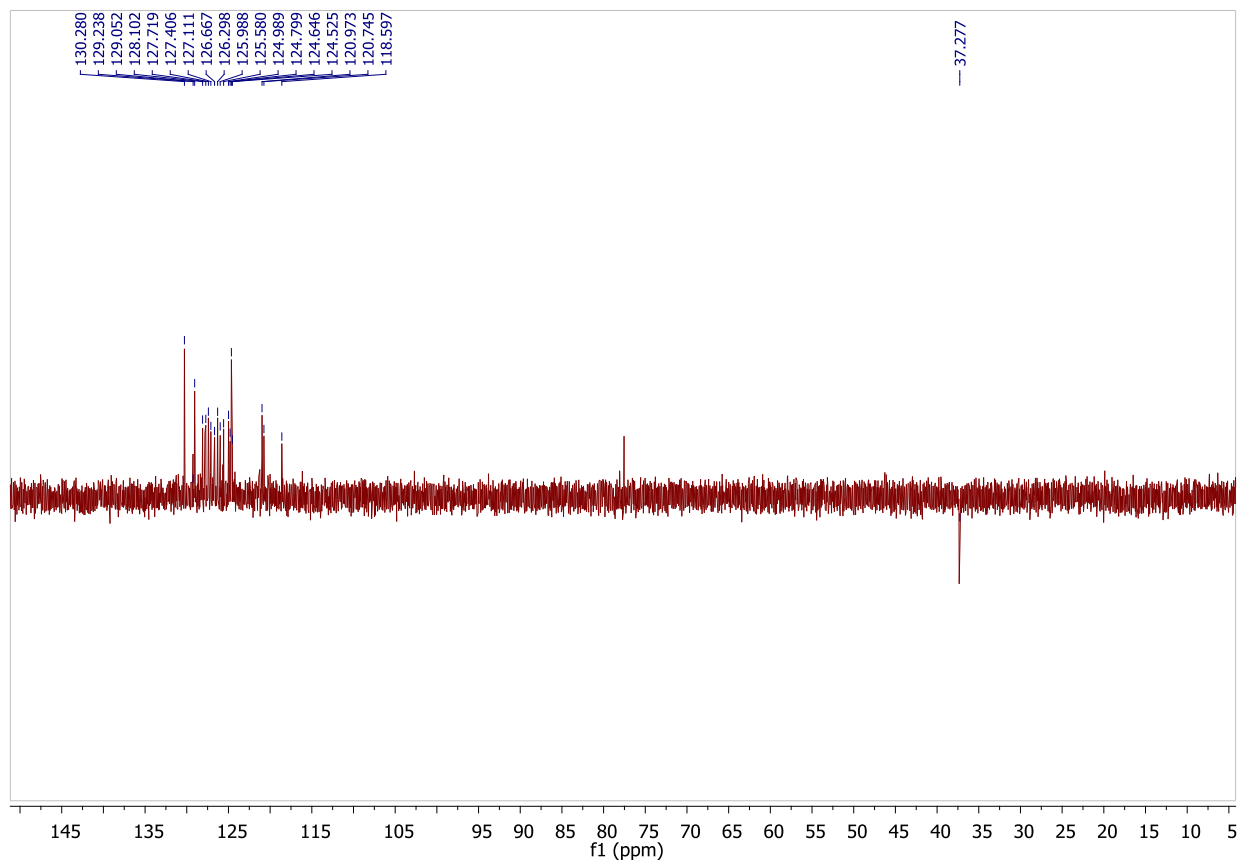

Supplement: c9ra09379f1.pdf [file c9ra09379f1.pdf]
